# Supplementary material for: Exposure to the widely used herbicide atrazine results in deregulation of global tissue-specific RNA transcription in the third generation and is associated with a global decrease of histone trimethylation in mice
Source: PubMed Central journal article supplement (PMC5175363; doi:10.1093/nar/gkw840), 2016-09-20
Supplement: supp_gkw840_nar-01413-v-2016-File007.pdf [file supp_gkw840_nar-01413-v-2016-File007.pdf]

## Supplementary Methods

**Animals and atrazine exposure.** All animal procedures were performed according to the guidelines for animal models in research defined by the Ethics Committee and approved by the Ministry of France (reference project number is 01861.02), and by persons who qualified for laboratory animal care and use. Eight-week-old adult CD1 mice were treated by oral gavage from E6.5 to E15.5 with atrazine in oil at a concentration of 100 mg/kg/day. The control mice were treated with the same volume of oil. The 12 week old F1 male progeny were crossed with unrelated untreated 12-week-old female and progeny of F2 were crossed again to receive F3 male progeny. 12 week-old F1 and F3 ATZ-derived or control-derived male mice were euthanized, and reproductive organs, liver and hypothalamus were dissected. At least five independent experiments were performed with at least six-to-ten animals in each group.

**Testosterone and FSH quantification.** Serum was collected from ketamine/xylazine-anaesthetized adult animals by terminal cardiac exsanguination, and aliquots were stored at -20°C. Testosterone levels in the serum were assayed in duplicate using a commercial radioimmunoassay (RIA) based on competitive binding with <sup>125</sup>I-labeled testosterone (Immunotech, Beckman Coulter, Villepinte, France), according to the manufacturer's recommendations. FSH measurements were conducted according to a standard protocol provided by a FSH measurement kit (KA2330, Abnova, Walnut CA, USA). In each hormone measurement, the data from at least 10 treated and control animals were averaged and plotted, and the results were expressed in nanograms per milliliter.

**Analysis of histology, apoptosis and germ cells/Sertoli cells numbers.** For the histological analysis, testis samples were fixed in Bouin's solution and embedded in paraffin. Histological sections (5- $\mu$ m thick) were stained with hematoxylin and eosin (H&E). The staging of cells in seminiferous tubules was performed according to an established method ([Russell 1990](#)), with analysis of at least 600 tubule sections. For immunohistochemistry (IHC), the animals were perfused, and the testes were fixed for 24 hours in 4% (wt/vol) paraformaldehyde (PFA), dehydrated and embedded in paraffin. For IHC, 5- $\mu$ m-thick testis sections were incubated overnight at 4°C with goat anti-ZBTB16 (diluted at 1:500) and rat anti-GATA1 (diluted at 1:50). The sections were counterstained with 0.001% (vol/vol) 4,6-diamidino-2-phenylindole dihydrochloride (DAPI) and mounted in Vectashield (Vector Laboratories, UK).

**Cells sorting by flow cytometry.** Germ cells were isolated from control and ATZ-derived F3 male testes. The testes were subjected to collagenase/DNAse I treatment and purified by FACS, as described previously (Zhu, Shao et al. 2011). The dispersed cells were fixed in 1% (wt/vol) buffered PFA for 20 min at 4°C and permeabilized in a solution of 0.2% (wt/vol) saponin containing propidium iodide to label the DNA. Cells were sorted at concentration of 1X10<sup>6</sup> cells/ml on FACSCalibur cell-sorting machine. The data were analyzed by CellQuestPro software, which was included with the sorter.

**Spermatozoa count.** Spermatozoa counts were conducted according to an established protocol ([Vallet-Erdtmann, Tavernier et al. 2004](#)). Briefly, mice were euthanized, and each epididymis was dissected, rapidly frozen in liquid nitrogen and stored at -80°C until the sperm heads were counted as follows. The organ was first cut with a scalpel into several fragments and homogenized in 50 ml 0.15 M NaCl containing 0.005% (vol/vol) Triton X-100 (Sigma). After homogenization with three rounds of sonication (12 kHz), an aliquot of the cell suspension was loaded onto a Malassez hemocytometer, and spermatozoa heads were counted. The data from at least ten controls or F3 ATZ-derived animals were averaged and plotted, and presented as averaged sperm counts normalized to control; a t-test was performed using Excel software.

**Antibodies.** The following commercial antibodies were used: rat anti-GATA1 (sc-265) and goat anti-PRM2 (sc-23104) antibodies from Santa Cruz, rabbit anti-H3K4me3 (07-473), mouse anti-H2B (05-1352) and rabbit anti-H4K5Ac (07-327) from Millipore, rabbit anti-Ddx4 (ab13840) from Abcam, mouse anti-ACTB (A1978) from Sigma Aldrich and goat anti-PLZF (AF2944) from R&D systems. Secondary HRP antibodies were purchased from Jackson Laboratories. Fluorescent secondary Alexa antibodies were purchased from Invitrogen.

### **Histone purification and Western blot analysis.**

Protein samples from F3 mouse testes were prepared using the EpiSeeker Histone Extraction Kit (Abcam, 113476) according to the manufacturer's supplied protocol. Briefly, mice testes were homogenized and centrifuged at 900 g for 5 min. The pellets were resuspended in lysis buffer and left on ice for 30 min. After centrifugation, the supernatant fractions containing acid-soluble proteins were transferred to new tubes, and the Balance-DTT buffer was added. The protein concentrations were determined using the Pierce™ 660nm Protein Assay (ThermoScientific, France). Five ug (H4K5ac), 10 ug (H2B) or 20 µg (H3K4me3) of protein were run on a 4-20% gradient gel (BioRad, USA) for 1 h. Proteins were transferred onto ImmobilonPSQ membranes (Millipore, France) using an electro-blotter system (TE77X; Hoefer, USA) and modified Towbin buffer (48 mM Tris base, 40 mM glycine and 0.1% (wt/vol) SDS) and methanol (20% (vol/vol) anode; 5% (vol/vol) cathode) for 2 hours. Proteins were detected using an H2B mouse monoclonal antibody, a PRM2 goat polyclonal antibody, an ACTB mouse monoclonal antibody and a H3K4me3 or a H4K5Ac rabbit polyclonal antibody. The antibodies were incubated in hybridization buffer. The primary antibodies were detected using secondary antibodies conjugated to horseradish peroxidase for 1 h. The signals were developed using the ECL-Plus Chemiluminescence kit (GE Healthcare, USA) and the ImageQuant 350 system (GE Healthcare, USA).

### **Meiotic surface spreads**

The surface spreads were prepared in 4 independent experiments from F3 control or ATZ progeny as described in a previous study ([Peters, Plug et al. 1997](#)). The analysis of the meiotic substages was performed according to previous studies ([Mahadevaiah, Turner et al. 2001](#), [Page, de la Fuente et al. 2012](#)). The images were taken from randomly chosen pachytene stages of prophase I of meiosis and reanalyzed independently by two researchers.

### **Fractionation of germ cells**

Germ cells were separated according to ([Bellve, 1979](#)). Briefly, 8 C57Bl/6J twelve week-old male mice were perfused with PBS, and testes were dissected. Testes were digested with collagenase, trypsin and DNase. The cells were loaded into 2-4% gradient of BSA and allowed to sediment. The spermatocytes and spermatids fractions were collected. The purity of the fractions was confirmed by DAPI staining of the small cell sample. Cells were fixed with PFA and used for ChIP-seq. The library and data analysis were done similar to analysis of total testis extracts.

### **Preparation and Immunohistochemistry of embryonic testis histological sections**

To perform immunohistochemistry in E15.5 and E18.5 embryo, the testis from control or ATZ-treated groups were fixed in PFA 4% (v/v) solution for 16 hours, then were dehydrated and embedded in paraffin. Organs were cut and every 5th sections (5 µm-thick) were taken for a slide. In total, testes from at least 3 animals of each group were used. The sections were deparaffined and rehydrated and slides were placed in 0.01M solution of citrate buffer, pH6 at 80°C for 45min to unmask the epitopes. The sections were washed three times for five minutes in 1X PBS Tween 0.05% (v/v), then incubated with primary antibody anti-Ddx4 diluted PBS-Tween 0.05% (v/v) overnight at 4C ° in a humid chamber. This antibody recognizes all germ cells. The following day the sections were washed with PBS-Tween 0.05% and then incubated with florescent secondary antibody for 1 hour in a humidified chamber. The sections were all counterstained with 0.001 % (vol/vol) 4,6-diamidino-2-phenylindole dihydrochloride (DAPI) and mounted in Vectashield (Vector Laboratories, UK). The images were taken using an AxioImager microscope equipped with an AxioCam MRc5 camera and AxioVision software version 4.8.2 (Zeiss, Le Pecq, France) with a 20X objective lens. To quantify the number of Ddx4-positive cells, we take at least 10 pictures in at least 3 different slides per replicate. We counted the number of Ddx4-positive cells in each tubule present on the picture and we report this number to the surface of seminiferous tubule measure using ImageJ software.

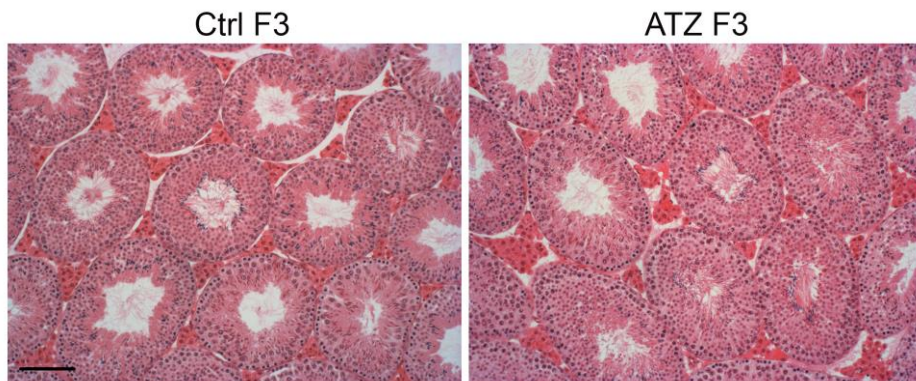

**Supplementary\_Figure\_S1. Embryonic exposure to ATZ does not affect morphology in the third generation of males after treatment.**

Representative image of H&E staining of the histological sections of F3 control (vehicle) and ATZ-derived mouse testes (12 weeks old). The sections from testis tissue were prepared as described in the Supplementary Methods section. We compared sections of seminiferous tubules at similar stages in at least 4 different samples of each group control (Ctrl F3) or ATZ (ATZ F3) derived, scale bar:150 $\mu$ M.

A

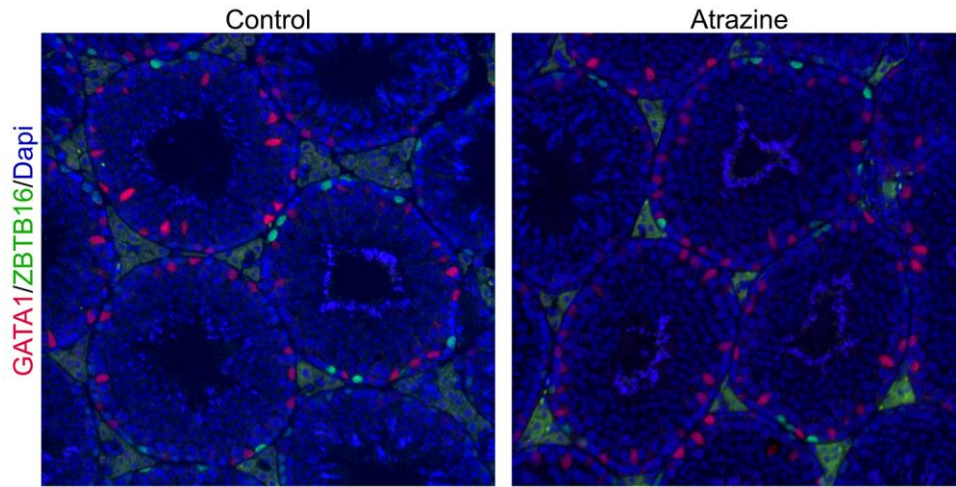

B

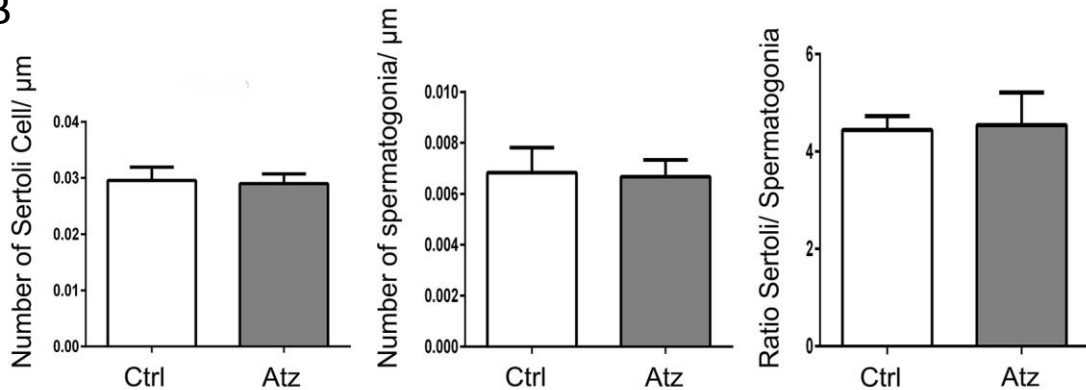

**Supplementary\_Figure\_S2. Embryonic exposure to ATZ does not affect the number of undifferentiated spermatogonia and Sertoli cells in the F3 generations after treatment.**

(A) Representative image of testis sections: Sertoli and spermatogonia cells are immunostained with anti- GATA1 or anti- ZBTB16 antibodies. (B) Quantitative analysis: cells, Sertoli cells and spermatogonia were counted manually at stage VII in F3 mouse testes. The contour of each tubule section was measured using the ImageJ software. The values indicate the cell counts per micrometer of tubule circumference. Ratio of the number of Sertoli cells per spermatogonia is also indicated.  $n=4$ , Scale bar: 50  $\mu\text{m}$ . The immunostaining of testis sections was performed as described in the Supplementary Methods section.

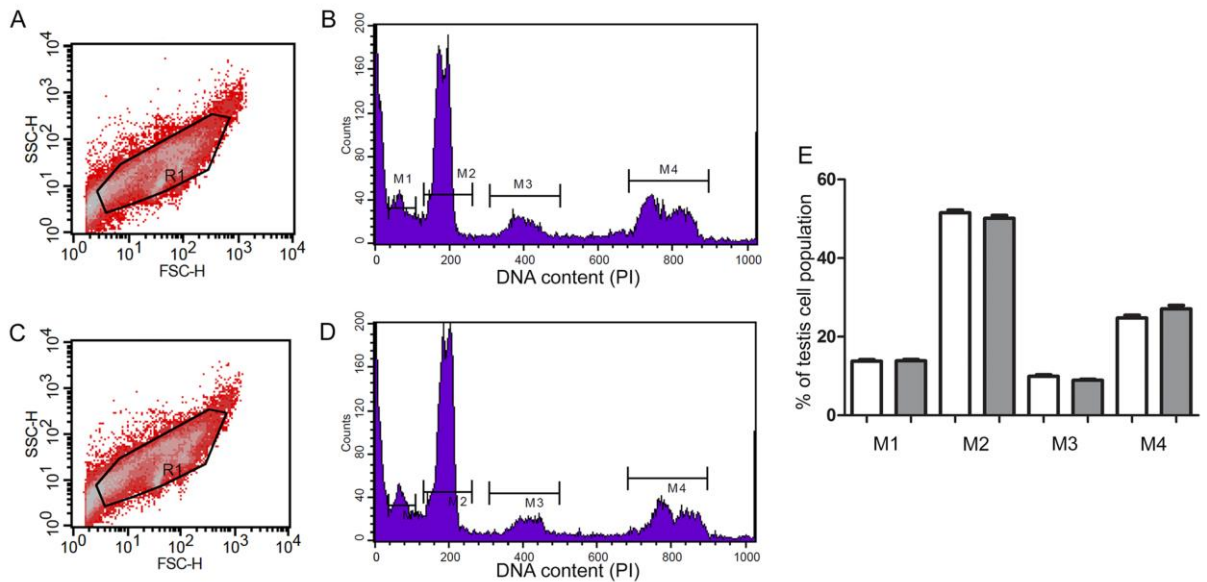

**Supplementary\_Figure\_S3. Embryonic exposure to ATZ does not affect cell populations in seminiferous tubules in the F3 generation of males after treatment.**

(A-D) Representative image of a flow cytometric analysis of germ cells from (A-B) control and (C-D) ATZ-derived testes. DNA content of cells was evaluated by propidium iodide incorporation (PI), which discriminates among the four populations: M1, spermatozoa; M2, haploid cells; M3, diploid cells; and M4, tetraploid cells (meiotic cells). (E) Quantitation of the percentage of cell type in each population from F3 control (white bars) and ATZ-derived mice (grey bars); n=8. The details of the flow cytometric analysis of germ cells are described in the Supplementary Methods section.

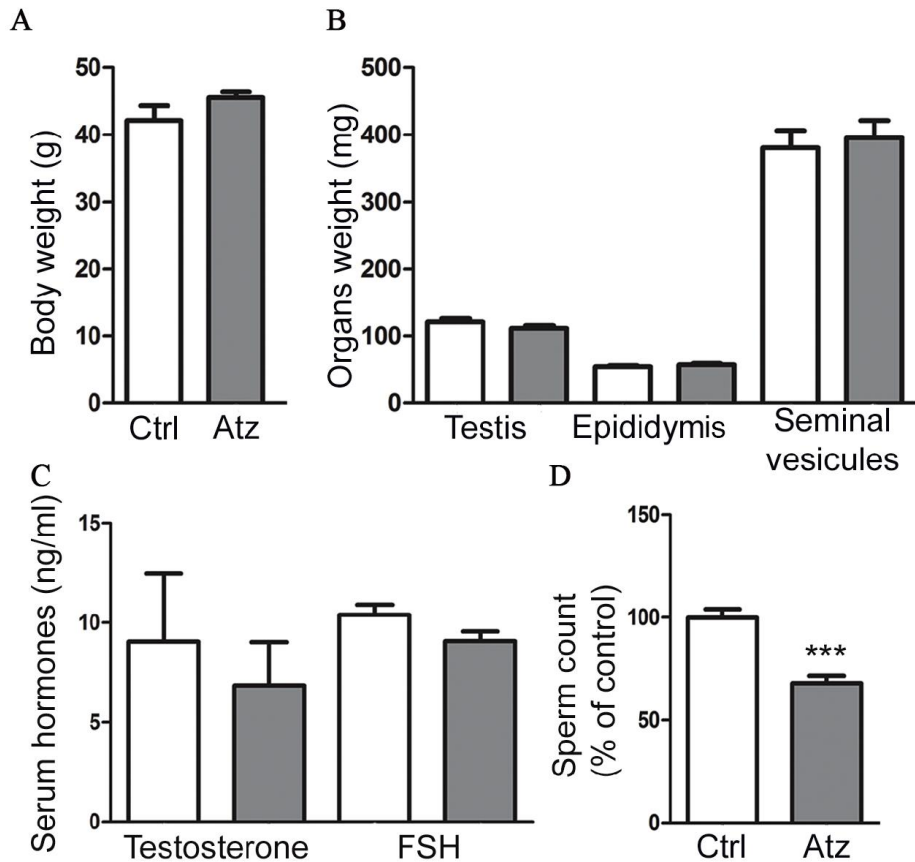

**Supplementary\_Figure\_S4. Embryonic exposure to ATZ does not affect the weight of reproductive organs but decreases spermatozoa number in the epididymis in the F3 generation of males after treatment.**

Weight of (A) body and (B) reproductive organs in F3 control (with bar) and ATZ (grey bar) mice ( $n \geq 14$ ). (C), Testosterone and FSH level are not significantly decreased in serum of F3 control and ATZ-derived mice ( $n \geq 8$ ). (D) The number of spermatozoa in the epididymis decreased in F3 ATZ-derived males compared to the control ( $n \geq 10$ ). Significant differences ( $P^{***} < 0.001$ , t-test) shown by asterisks. The measurements of hormones and spermatozoa counts are described in the Supplementary Methods section.

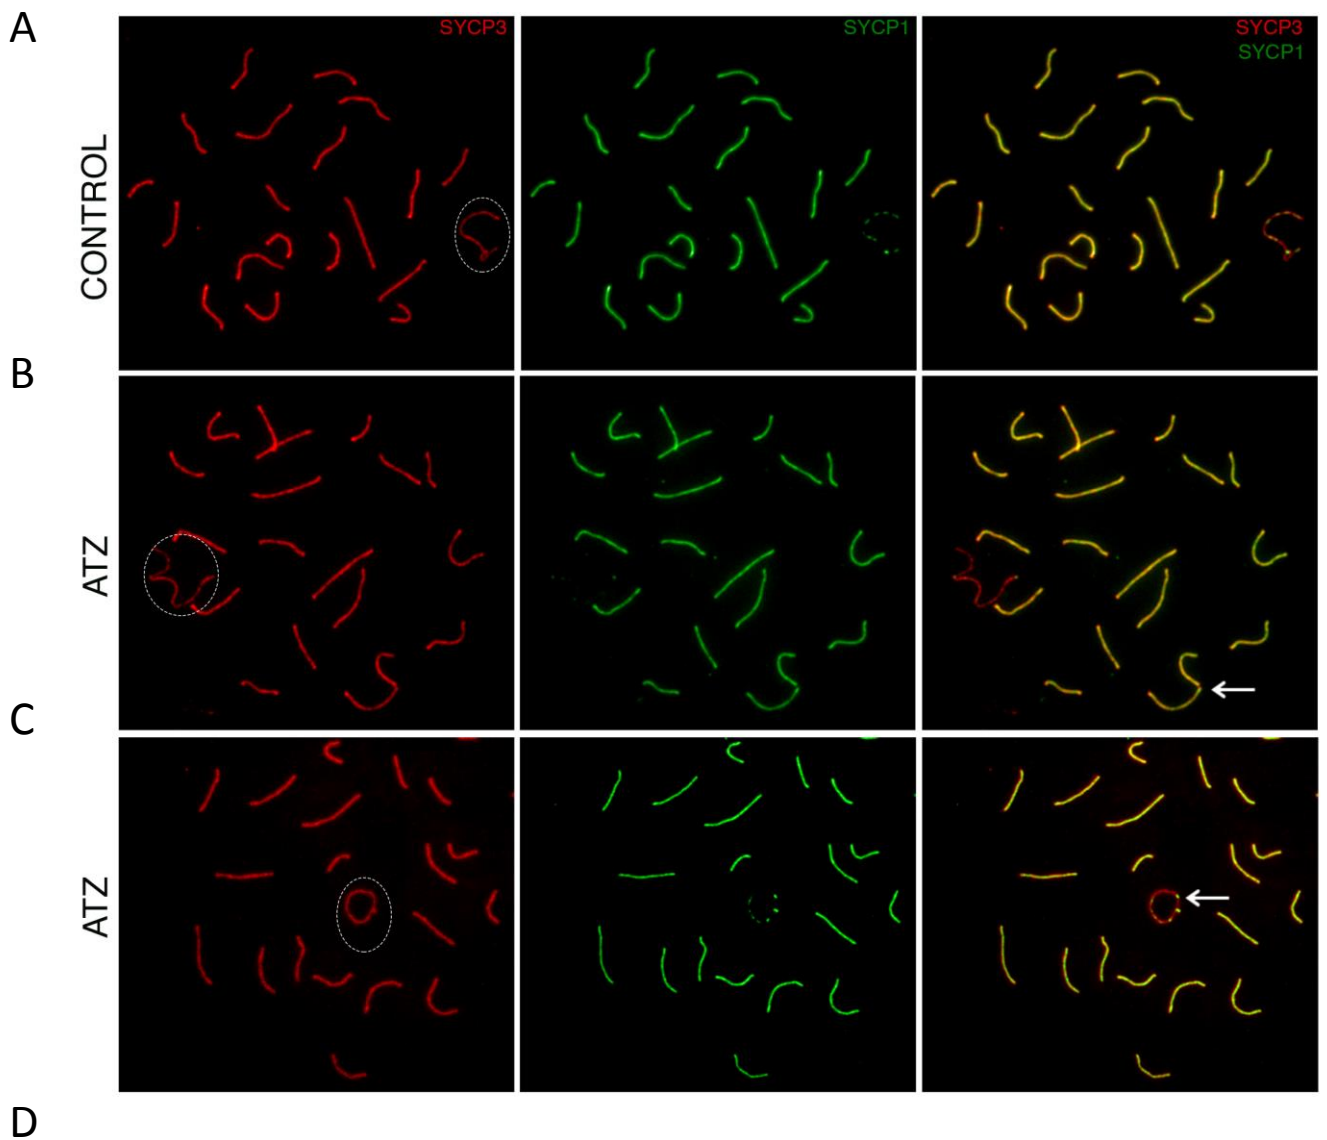

|                | Normal SCs | Telomere defects | "ring" sex body | Incomplete synapse |
|----------------|------------|------------------|-----------------|--------------------|
| control, n=199 | 185        | 10               | 0               | 4                  |
| ATZ, n=195     | 156        | 25               | 10              | 4                  |

**Supplementary\_Figure\_S5. Embryonic exposure to ATZ affects meiosis in F3 ATZ-derived males.**

Surface spreads were prepared from F3 generation testes of the control or ATZ-derived males from 4 independent experiments as described in Supplementary Methods section. The spreads were immunostained against the major protein of lateral element of synaptonemal complex (SC), SYCP3 (in red), and against protein of the SC central element, SYCP1 (in green). (A) Representative images of control testis spread, normally SYCP3 is detected along the length of every chromosomes, SYCP1 is present in all autosomal chromosomes and is visible as punctuated or absent immunostaining pattern in sex chromosomes, (B) In ATZ-derived males the cells with anomalies of the telomere connections are increased (C) the formation in sex chromosomes of the "ring" like structure. X and Y sex chromosomes (sex body) is circled, the arrow shows the chromosomes with abnormal phenotypes. N=199 (control), n=195 (ATZ),  $p < 0.01$ , Pearson's chi-squared test.

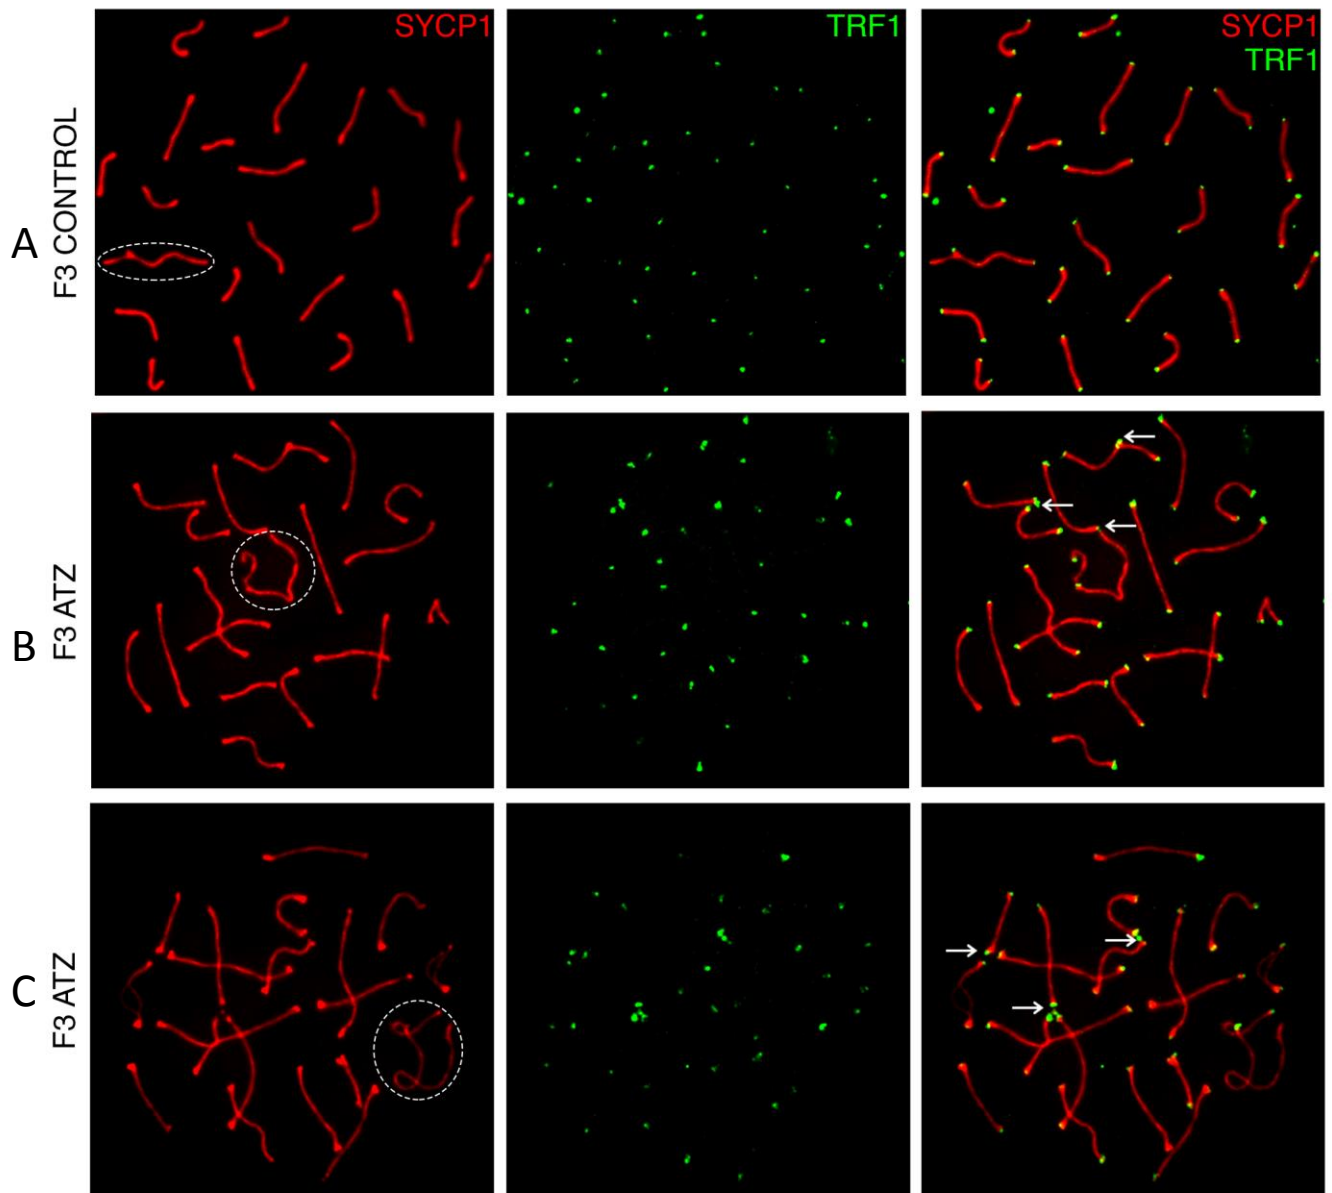

**Supplementary\_Figure\_S6. Embryonic exposure to ATZ causes defects in SC in F3 ATZ-derived males.**

Surface spreads were prepared from the testes of the F3 generation of control or ATZ-derived males as described in Supplementary Methods section. The spreads were immunostained against the major protein of synaptonemal complex, SYCP3 (in red), and TERF1 (in green), a telomere –binding protein. (A) In control cells the TERF1 signal is detected at the end of each chromosomes. (B) The telomeres of different chromosomes are connected in cells of ATZ-derived males. (C), The telomeres of different chromosomes were connected in ATZ-derived sample, X and Y sex chromosomes (sex body) are circled, the arrows show the chromosomes with abnormal phenotypes.



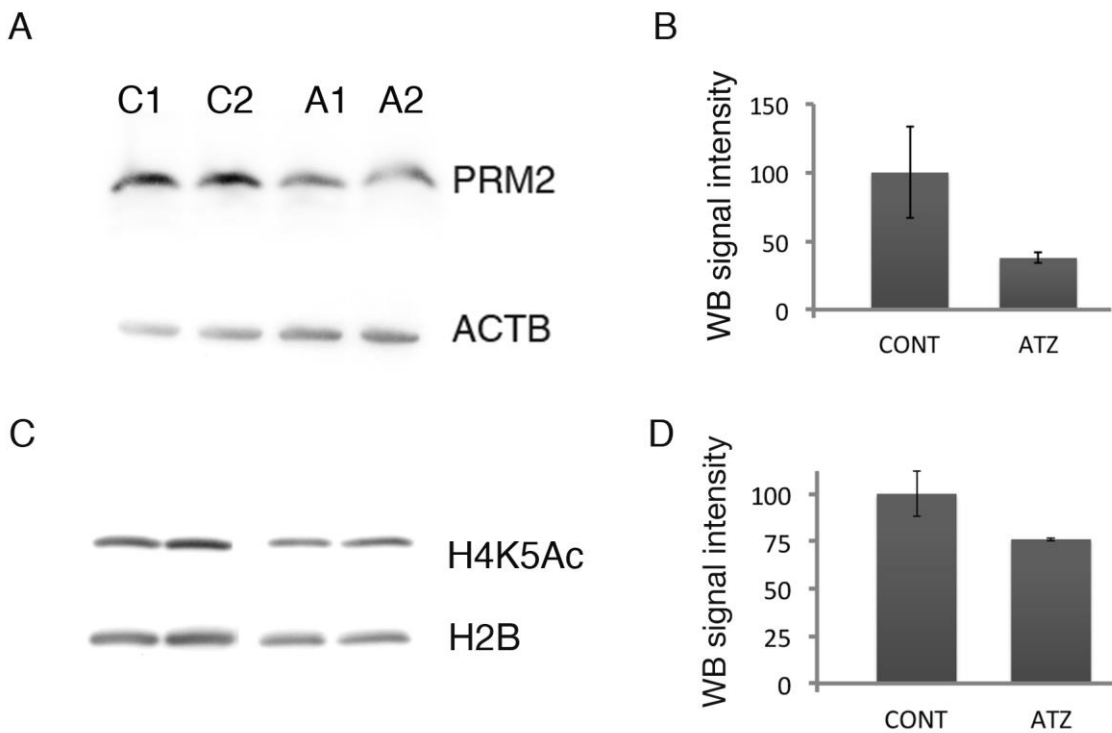

**Supplementary\_Figure\_S7. The PRM2 and H4K5Ac proteins are decreased in F3 ATZ progeny males.**

The total protein extracts or purified histone fractions from F3 control or ATZ progeny testes were prepared as described in Supplementary Methods. Two biological replicates of protein extracts were used. (A) The signal of PRM2 intensity was normalized to ACTB, (B) quantitative analysis of the blot in A. (C) The signal of H4K5Ac intensity was normalized to intensity of unmodified histone H2B, (D) quantitative analysis of the Western blot in C. The peak intensities was calculated using Image J software.

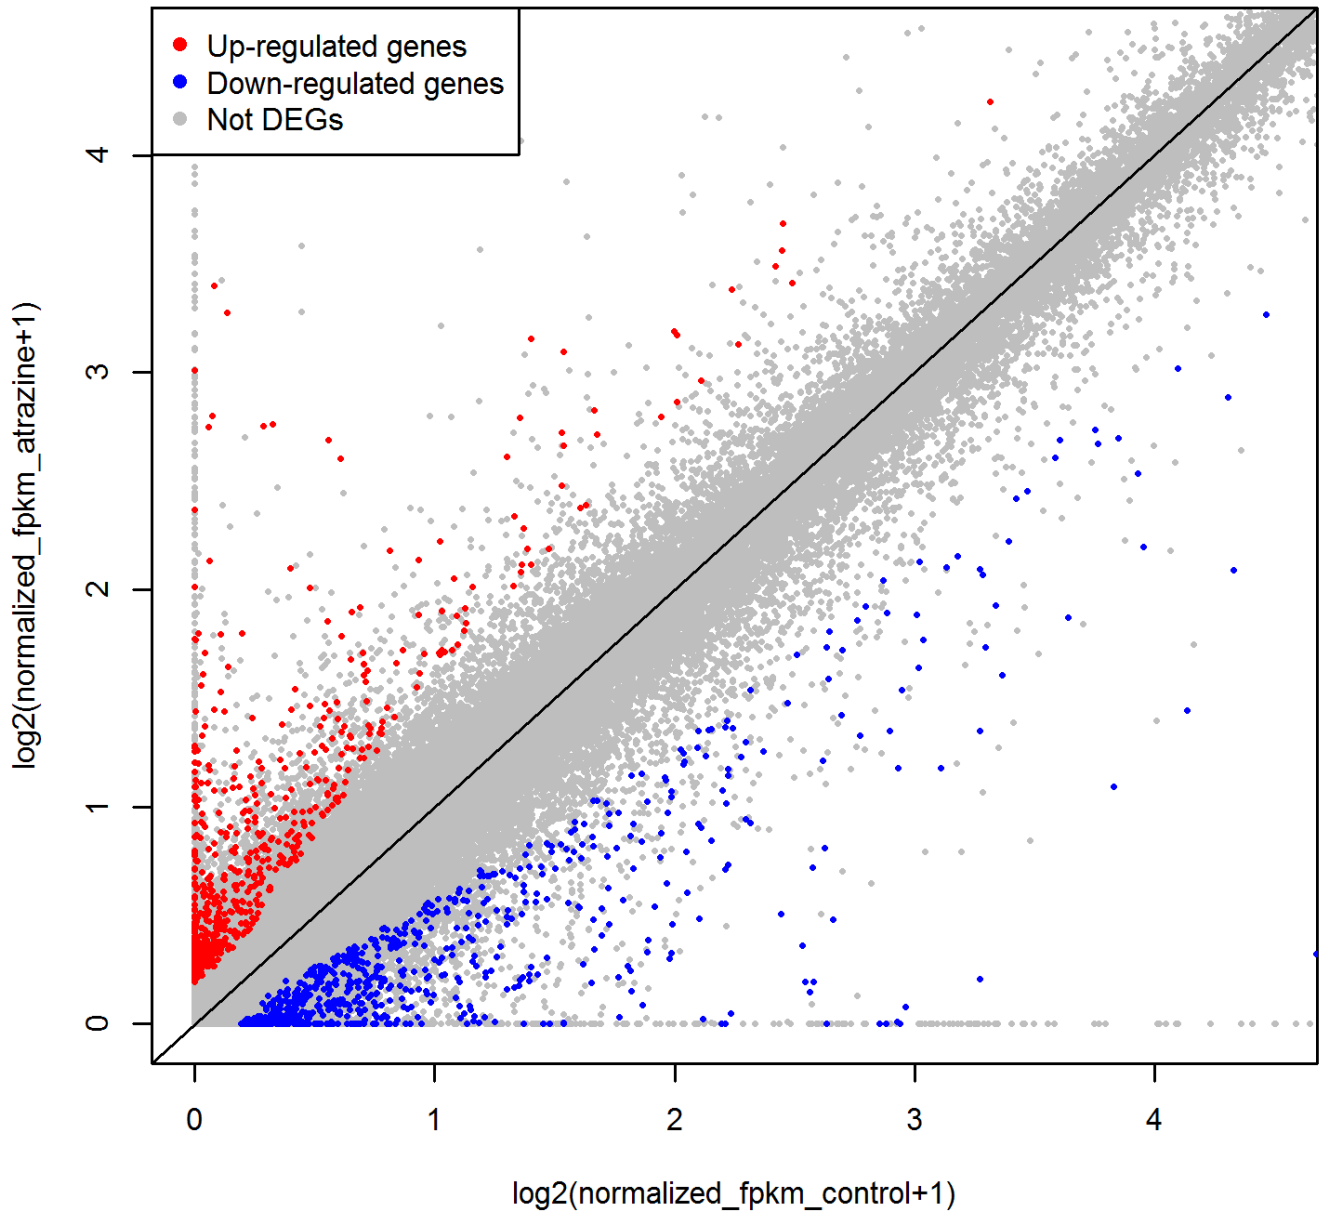

**Supplementary\_Figure\_S8: Embryonic exposure to ATZ globally affects gene expression in the testis tissue in third generation of males**

The scatter plot of differentially expressed genes. Each dot is the  $\log_2$  mean normalized FPKM (fragments per kilobase of exon per million mapped fragments) value from three biological replicates. Up-regulated transcripts are depicted in red, down-regulated ones in blue and not differentially expressed transcripts are in grey, (619 transcripts are upregulated and 703 downregulated).

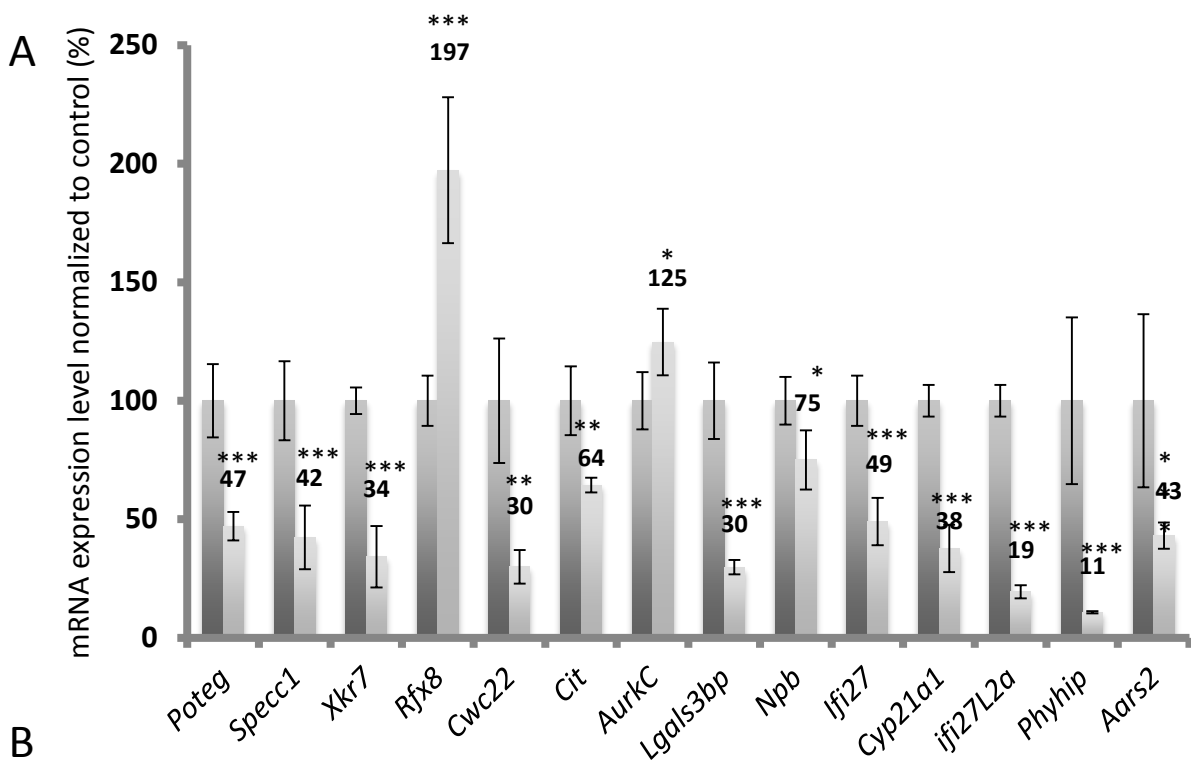

**B**

| gene            | RNA-seq FC | FDR RNA-seq | qPCR FC | p-value qPCR | process                                          |
|-----------------|------------|-------------|---------|--------------|--------------------------------------------------|
| <i>Poteg</i>    | 0.49       | 0.013       | 0.47    | 0.00346      | Spermatogenesis                                  |
| <i>Specc1</i>   | 0.46       | 0.017       | 0.42    | 0.00196      | Spermatogenesis, role in cancer                  |
| <i>Xkr7</i>     | 0.48       | 0.050       | 0.34    | 0.00066      | ND                                               |
| <i>Rfx8</i>     | 0.42       | 0.001       | 0.42    | 0.00503      | Transcription                                    |
| <i>Cwc22</i>    | 0.27       | 0.019       | 0.30    | 0.01010      | Splicing                                         |
| <i>Cit</i>      | 0.00       | 0.025       | 0.64    | 0.01406      | Spermatogenesis                                  |
| <i>AurkC</i>    | 3.48       | 0.023       | 1.25    | 0.03762      | Spermatogenesis                                  |
| <i>Lgals3bp</i> | 0.22       | 0.008       | 0.30    | 0.00256      | Cell adhesion                                    |
| <i>Npb</i>      | 0.47       | 0.044       | 0.75    | 0.02218      | G-protein coupled receptor b                     |
| <i>Ifi27</i>    | 0.33       | 0.019       | 0.49    | 0.00044      | Regulation of transcription                      |
| <i>Cyp21a1</i>  | 0.23       | 0.034       | 0.38    | 0.00011      | C21-steroid hormone biosynthetic                 |
| <i>Ifi27L2a</i> | 0.10       | 0.049       | 0.19    | 0.00503      | Immune response                                  |
| <i>Phyhip</i>   | 0.01       | 0.032       | 0.11    | 0.00002      | Mitophagy                                        |
| <i>Aars2</i>    | 0.45       | 0.040       | 0.43    | 0.01473      | Mitochondrial respiratory chain complex assembly |
| <i>Spin2d</i>   | 7.59       | 0.007       | 10.69   | 0.05092      | ND                                               |
| <i>Crtam</i>    | >10        | 0.042       | 4.71    | 0.00878      | Regulation of immune response                    |

**Supplementary\_Figure\_S9. Comparison of RNA-seq data and qPCR gene expression data for mRNA analysis.**

(A) Differentially expressed genes identified by RNA-seq and confirmed by qPCR. Total RNA was extracted, cDNA isolated and qPCR performed as described in the Methods section. Primer sequences are indicated in Supplemental\_Table\_S12. At least 4 independent experiments were performed and averaged (\*  $p < 0.05$ , \*\*  $p < 0.01$ , \*\*\*  $p < 0.001$ , t-test). Control samples are in dark grey, ATZ-derived in light grey. (B) Comparison of gene expression determined by RNA-seq and qPCR data.

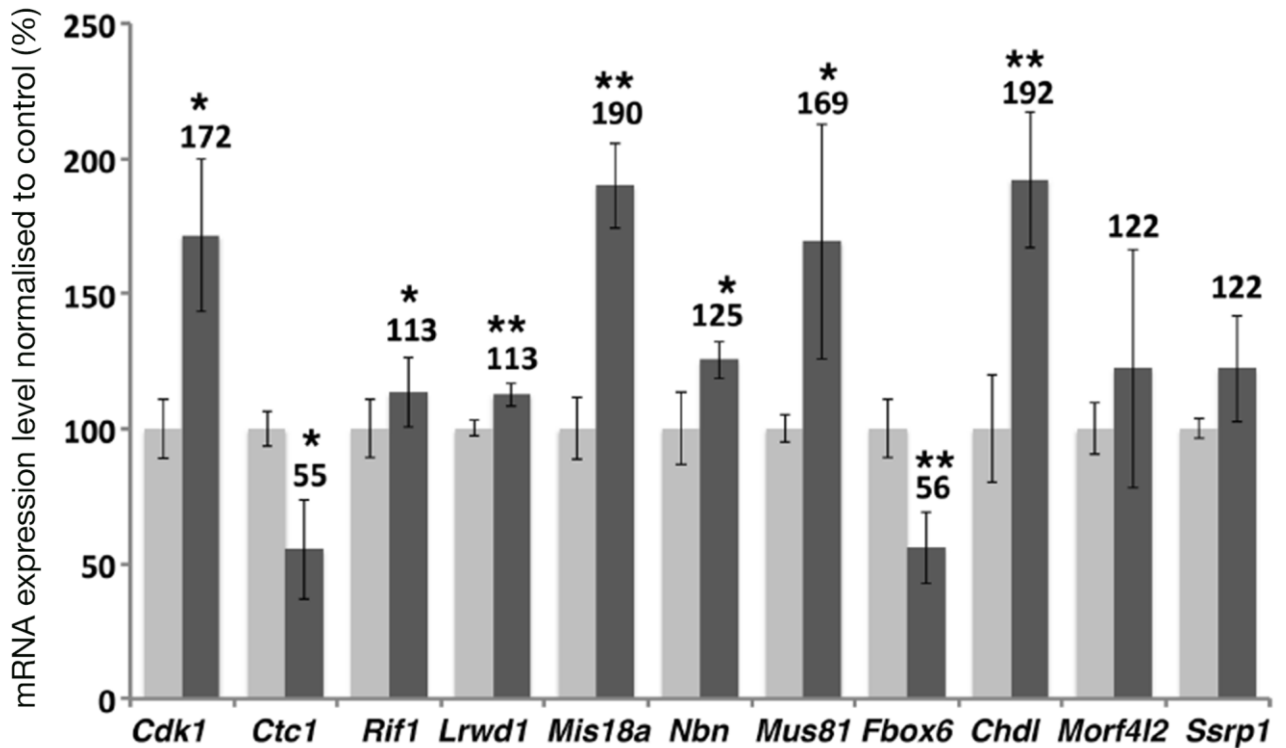

**Supplementary\_Figure\_S10. Embryonic exposure to ATZ affects the expression of several genes belonging to the DNA damage pathway.**

QPCR confirmation of differentially expressed genes of DNA damage response. The details of the experiments are described in the Methods section. The data represent the average of at least 4 independent experiments and are expressed as mRNA expression level in the experimental sample compared to the control (%) ( $p < 0.05$ , \*\*  $p < 0.01$ , \*\*\*  $p < 0.001$ , t-test). The primer sequences are indicated in Supplemental\_Table\_S12.

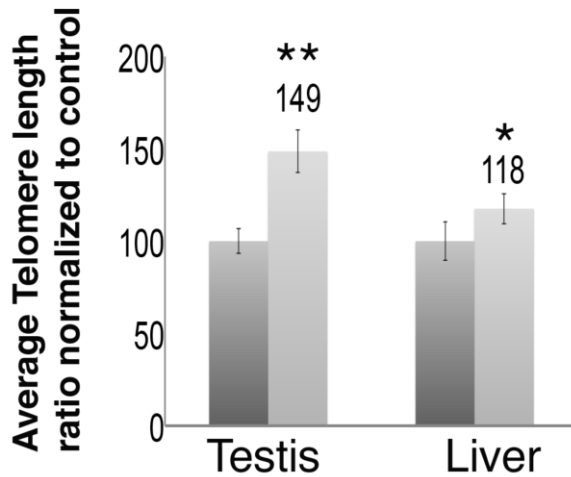

### Supplementary\_Figure\_S11. Embryonic exposure to ATZ affects the telomeres length.

Genomic DNA was isolated from testis or liver tissues using Proteinase K and phenol: chloroform extraction. Concentration of DNA was estimated by fluorescent method. Equal amounts of DNA were used for qPCR. The primers sequences are indicated in Supplementary\_Table\_S12.

Data from at least 6 independent experiments were averaged and expressed as the average telomere length (ATLR) normalized to control, (\*  $p < 0.05$ , \*\*  $p < 0.01$ , t-test).

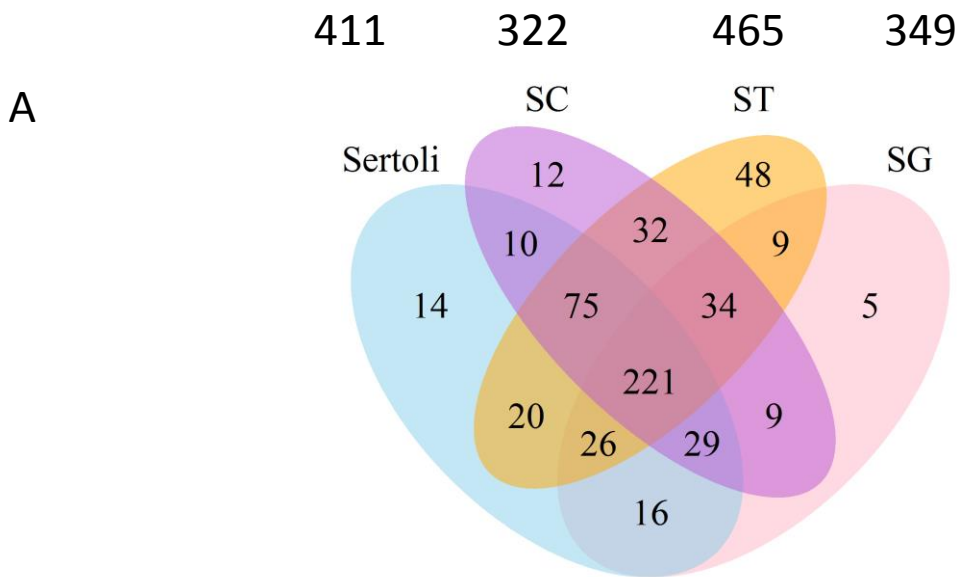

B

| Gene symbol          | Gene Name                                                   |
|----------------------|-------------------------------------------------------------|
| <i>2810474O19Rik</i> | RIKEN cDNA 2810474O19 gene                                  |
| <i>Acp6</i>          | acid phosphatase 6, lysophosphatidic                        |
| <i>Aox3</i>          | aldehyde oxidase 3                                          |
| <i>Esrrb</i>         | estrogen related receptor, beta                             |
| <i>Flnb</i>          | filamin, beta                                               |
| <i>Gatad2b</i>       | GATA zinc finger domain containing 2B                       |
| <i>Gtf2i</i>         | general transcription factor II I                           |
| <i>Hsp90aa1</i>      | heat shock protein 90, alpha                                |
| <i>Islr2</i>         | immunoglobulin superfamily containing leucine-rich repeat 2 |
| <i>Manba</i>         | mannosidase, beta A, lysosomal                              |
| <i>Mcf2</i>          | mcf.2 transforming sequence                                 |
| <i>Ncor1</i>         | nuclear receptor co-repressor 1                             |
| <i>Prrc2b</i>        | proline-rich coiled-coil 2B                                 |
| <i>Rfc1</i>          | replication factor C (activator 1) 1                        |
| <i>Rfc5</i>          | replication factor C (activator 1) 5                        |
| <i>Rif1</i>          | replication timing regulatory factor 1                      |
| <i>Ssrp1</i>         | structure specific recognition protein 1                    |
| <i>Sumo3</i>         | small ubiquitin-like modifier 3                             |
| <i>Esrrb</i>         | estrogen related receptor, beta                             |

**Supplementary\_Figure\_S12: The origin of differentially expressed testis genes in the third generation of males after treatment.**

A). The differentially expressed genes were compared with gene expression in different cell types from previously published dataset (Gan, Wen et al. 2013). Each oval represents a fraction, Sertoli (Sertoli cells), SC (spermatocytes), ST (spermatids), SG (Spermatogonia). A large number of genes (221) are shared between all cell fractions. The highest number (48) of unique differentially expressed genes are found in spermatid fraction. B). DEGs from spermatogonia fraction are known to be interacting with POU5F1.

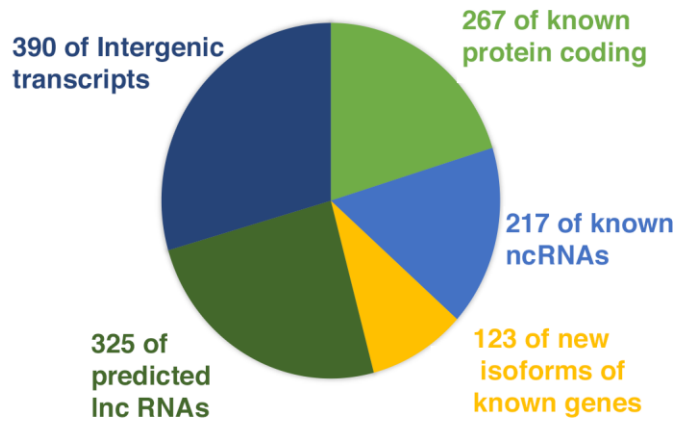

**Supplementary\_Figure\_S13. Group of transcripts that are differentially expressed in the F3 generation of the ATZ -derived males.**

The pie chart shows the distribution of the differentially expressed RNA types in the testis tissue of F3 ATZ-derived males. The RNA-Seq data were analyzed as described in the Methods section.

A

| Term Name                              | Number of genes | P-Value  | Genes                                                                                                                                                                                                                       |
|----------------------------------------|-----------------|----------|-----------------------------------------------------------------------------------------------------------------------------------------------------------------------------------------------------------------------------|
| transcription regulator activity       | 32              | 1.77E-04 | <i>Sox2, Sox5, Sox14, Meis1, Max, Lbh, Olig3, Gata3, Gata4, Hey2, Foxb2, Atoh8, Foxd1, Tlx1, Klf5, Klf12, Tbx3, , Nr4a2, Rybp, Tead1, Ldb2, Arntl, Isl1, Med13l, Ppargc1a, Med10, Mef2d, Hhex, Ets1, Vgll3, Prdm2, Rbpj</i> |
| nitrogen compound biosynthetic process | 13              | 1.07E-03 | <i>Bcat1, Dctd, Adss, Nampt, Adcy1, Atp11b, Nr4a2, Atp5g3, Cmpk2, Gm4953, Gata3, Mat2b, Tph2</i>                                                                                                                            |
| cell motion                            | 13              | 5.32E-03 | <i>Fut8, 4921509c19rik, Plxna2, Gm14147, Nr4a2, Tnp1, Isl1, Kitl, Alcam, Tns1, Bmp7, Foxd1, Ch11</i>                                                                                                                        |
| regulation of cell development         | 8               | 6.82E-03 | <i>Tbx3, Ntrk2, Sox2, Sox5, Isl1, Bmp7, Meis1, Ngf</i>                                                                                                                                                                      |
| regulation of organ growth             | 4               | 1.06E-02 | <i>Gata4, Hey2, Cxadr, Bcl2l1l</i>                                                                                                                                                                                          |
| potassium ion binding                  | 6               | 1.90E-02 | <i>Kcnma1, Slc24a3, Kcnh7, Kcnj3, Kcnip4, Kcnv1</i>                                                                                                                                                                         |

B

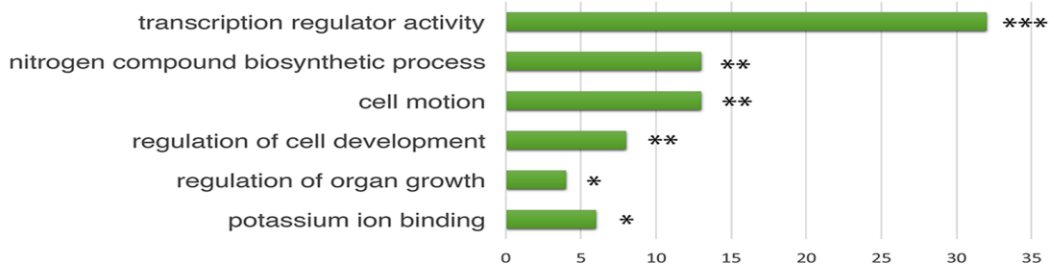

C

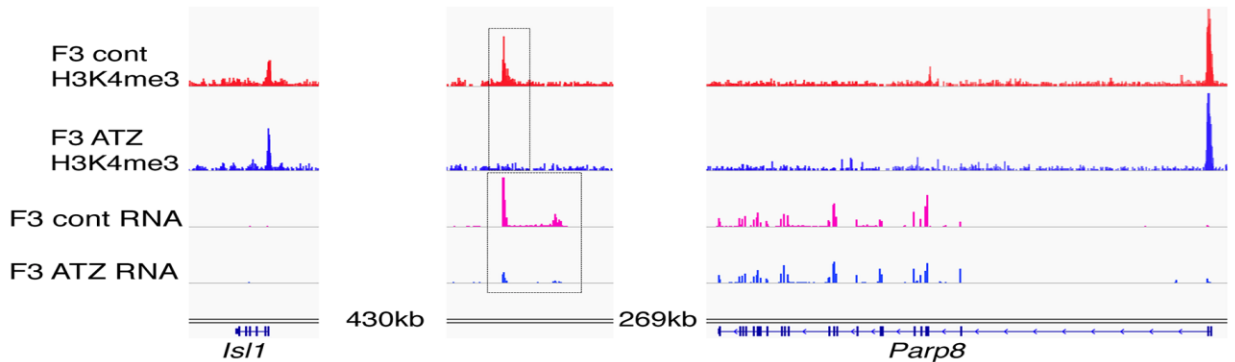

**Supplementary\_Figure\_S14: The expression of the new long noncoding RNA is globally affected in the F3 generation.**

(A) Gene Ontology (GO) term enrichment of genes located upstream and downstream of LincRNA. GO terms were sorted based on p-values (\* $P < 0.05$ ; \*\*  $P < 0.01$ , \*\*\*  $P < 0.001$ , Fisher exact test). (B) The plot represents the number of genes in each GO category. (C) A new predicted long noncoding RNA is located distally from the *Isl1* and *Parp8* genes. Both the expression of noncoding RNA and the H3K4me3 occupancy in the promoter are dramatically decreased. H3K4me3 peaks and RNA expression were determined as described in the Methods section and represent the averaged and normalized values of two (ChIP-seq) or three (RNA-seq) biological replicates for the F3 control (in red) or ATZ-derived (in blue) males testes.



### *Adat1* H3K4me3

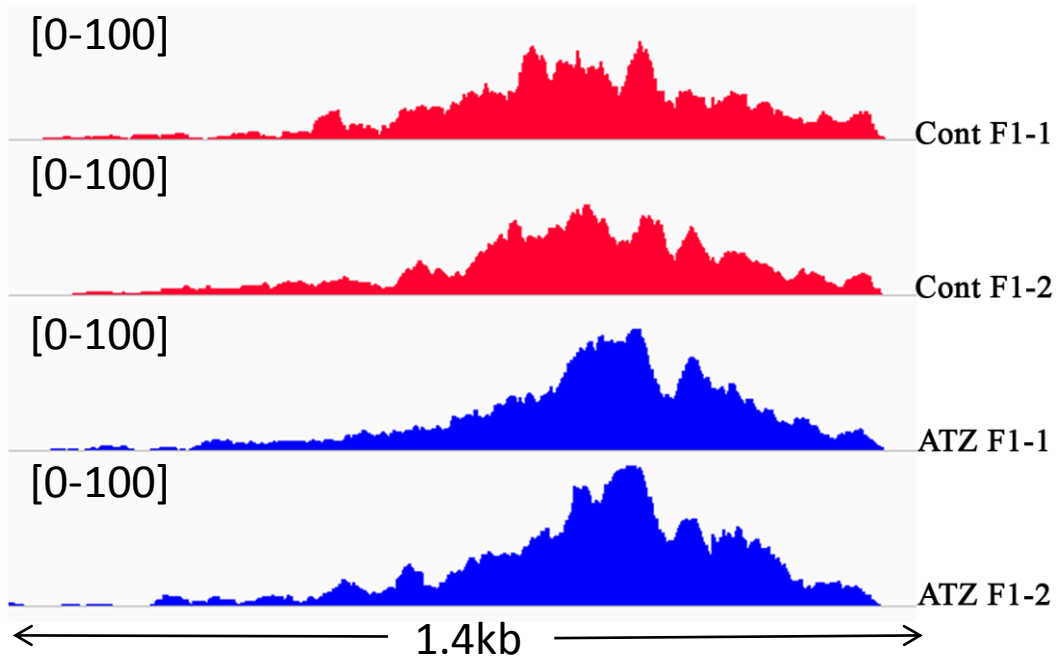

**Supplementary\_Figure\_S15. Embryonic exposure to ATZ affects the H3K4me3 regions in promoters of *Adat1* gene in F1 ATZ-derived males.**

Histone H3K4me3 occupancy is changed in the promoter of the *Adat1* gene in the testes of the F1 generation of ATZ-derived males. Each plot represents the normalized number of tags in the control (red) and ATZ-derived samples (blue). Two biological replicates are shown for the control and the ATZ-derived animals. The IGV genome viewer v 2.3.36 was used to visualize the ChIP-seq data for the *Adat1* gene.

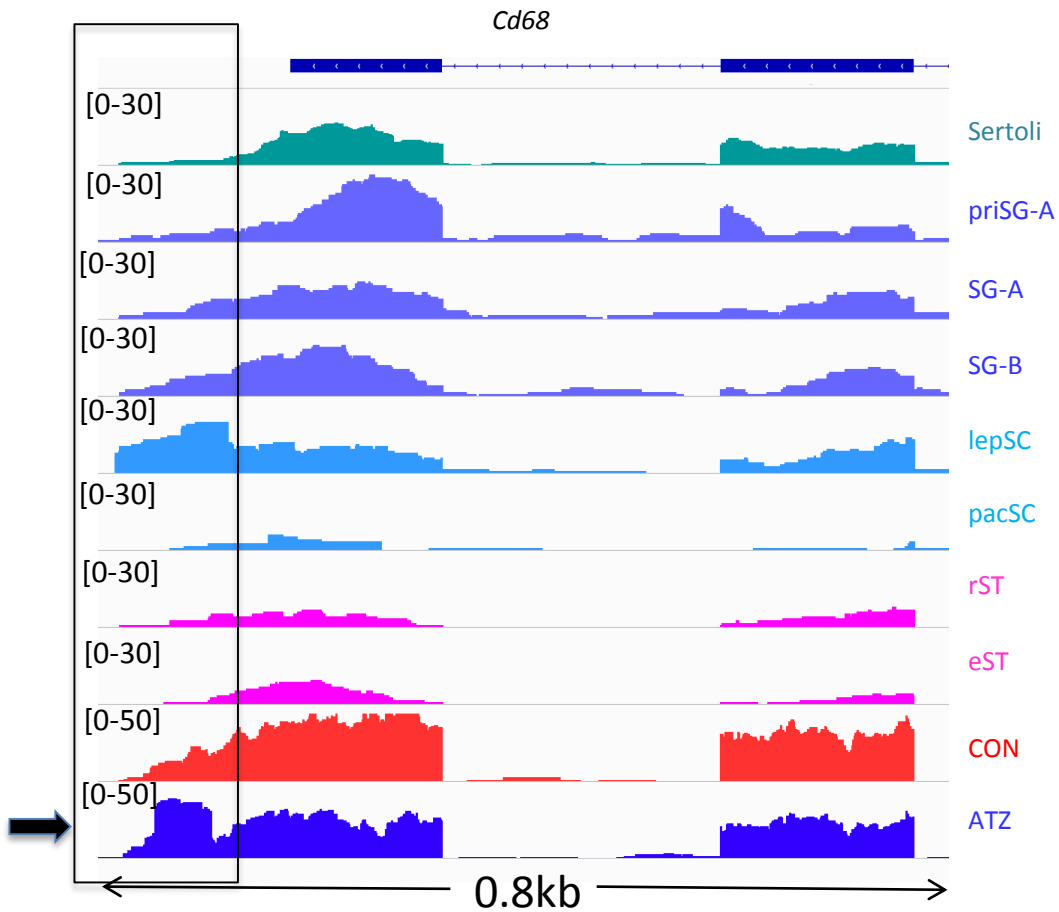

**Supplementary\_Figure\_S16. The altered APA transcript of the *Cd68* gene was identified in F3 ATZ progeny males.**

The RNA profiles from different cell types based on previous work were reanalyzed (Gan, Wen et al. 2013). The *CD68* gene has only one transcript. The altered polyadenylated site is shown by an arrow. Three biological replicates of RNA-seq data in *Cd68* transcripts were merged for simplicity in the control (red) and ATZ-derived (blue) transcripts and are represented as averaged and normalized tag numbers. The direction of transcription is on the opposite strand. priSG-A: primitive type A spermatogonia; SG-A: type A spermatogonia; SG-B: type B spermatogonia; lepSC: leptotene spermatocytes; pacSC: pachytene spermatocytes; rST: round spermatids; eST: elongative spermatids; CON: F3 testis, control; ATZ: F3 testis, atrazine. The IGV genome viewer v 2.3.36 was used to visualize the RNA-seq data.

**A**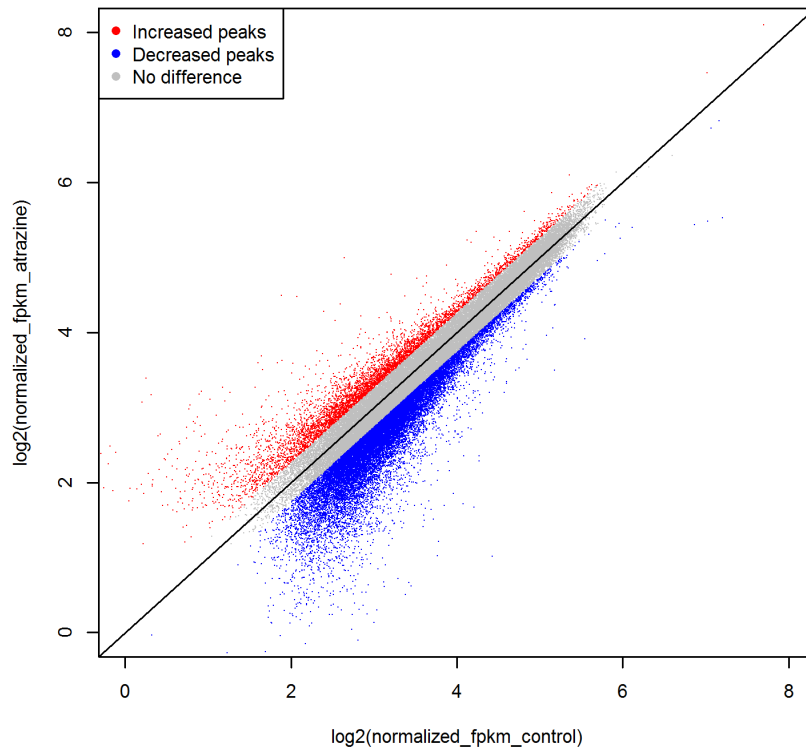**B**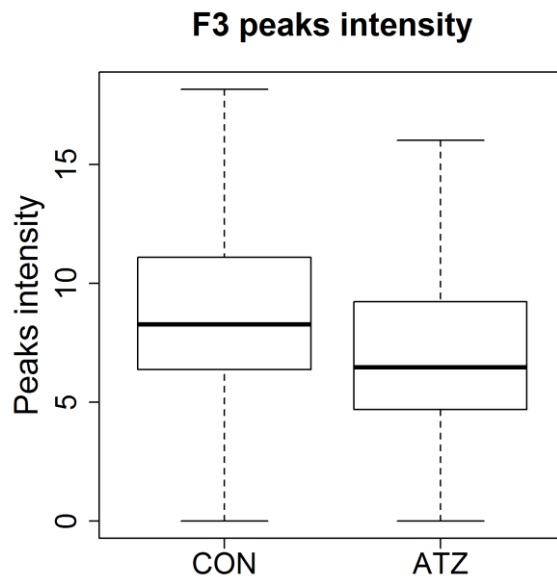

**Supplementary\_Figure\_S17.** The scattered plot and boxplot of H3K4me3 peaks with FC above 1.2.

(A) The scattered plot of differential peaks. With fold change above 1.2, we found 5010 peaks have increased and 19479 peaks have decreased H3K4me3 occupancy. Each dots represents the log2 of mean normalized FPKM value from two biological replicates. The increased occupancy peaks are depicted in red, decreased occupancy peaks are in blue, peaks with no changes in H3K4me3 occupancy are shown in grey color. (B) Boxed plot of H3K4me3 peaks intensity

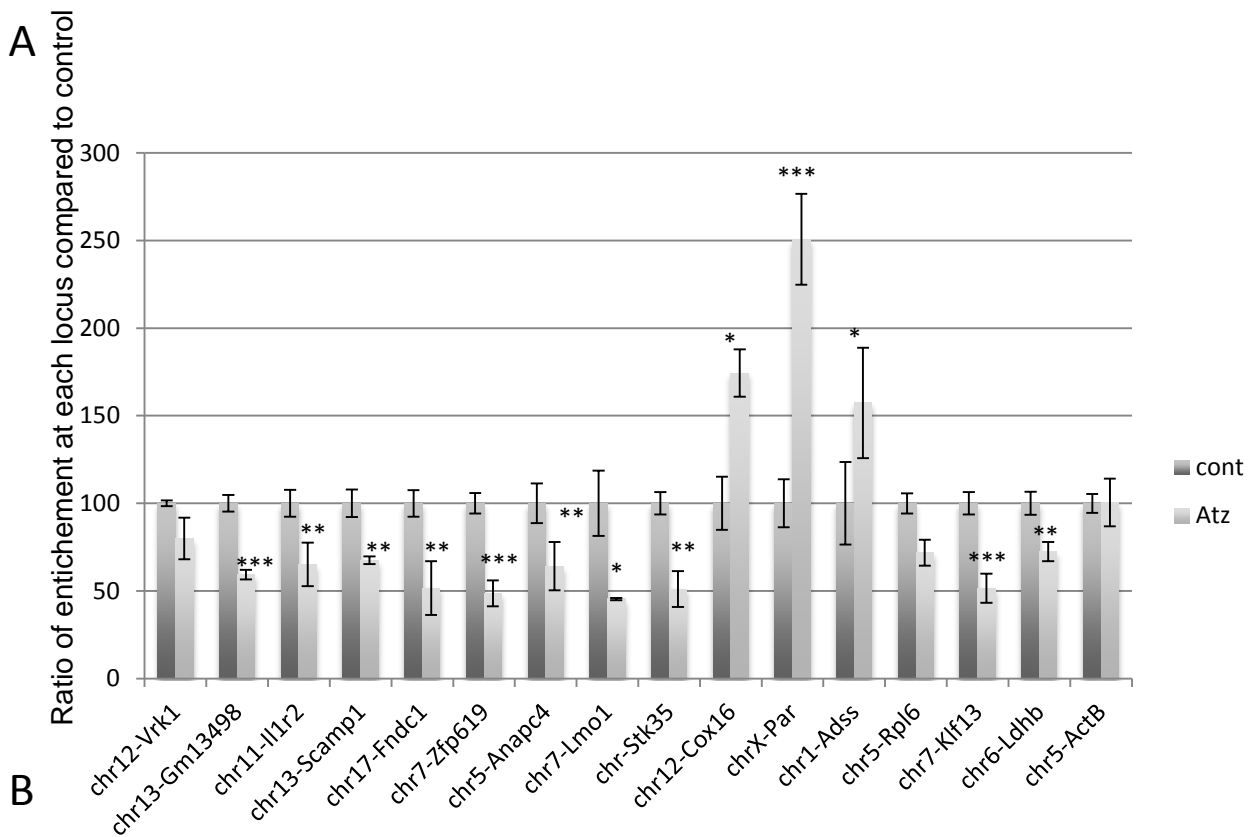

**Supplementary\_Figure\_S18. Comparison of ChIP-seq and ChIP-qPCR data.**

(A) ChIP-qPCR was performed as described in the Methods section. The primer sequences are indicated in Supplemental\_Table\_S12. The average of at least 4 independent experiments is plotted and expressed as the ratio of enrichment of ChIP product compared to Input and normalized to the control, \* $p < 0.05$ , \*\* $p < 0.01$ , \*\*\*,  $p < 0.001$ , t-test. The control samples are in dark grey, the ATZ-derived in light grey.

(B) Comparison of ChIP-seq and ChIP-qPCR data

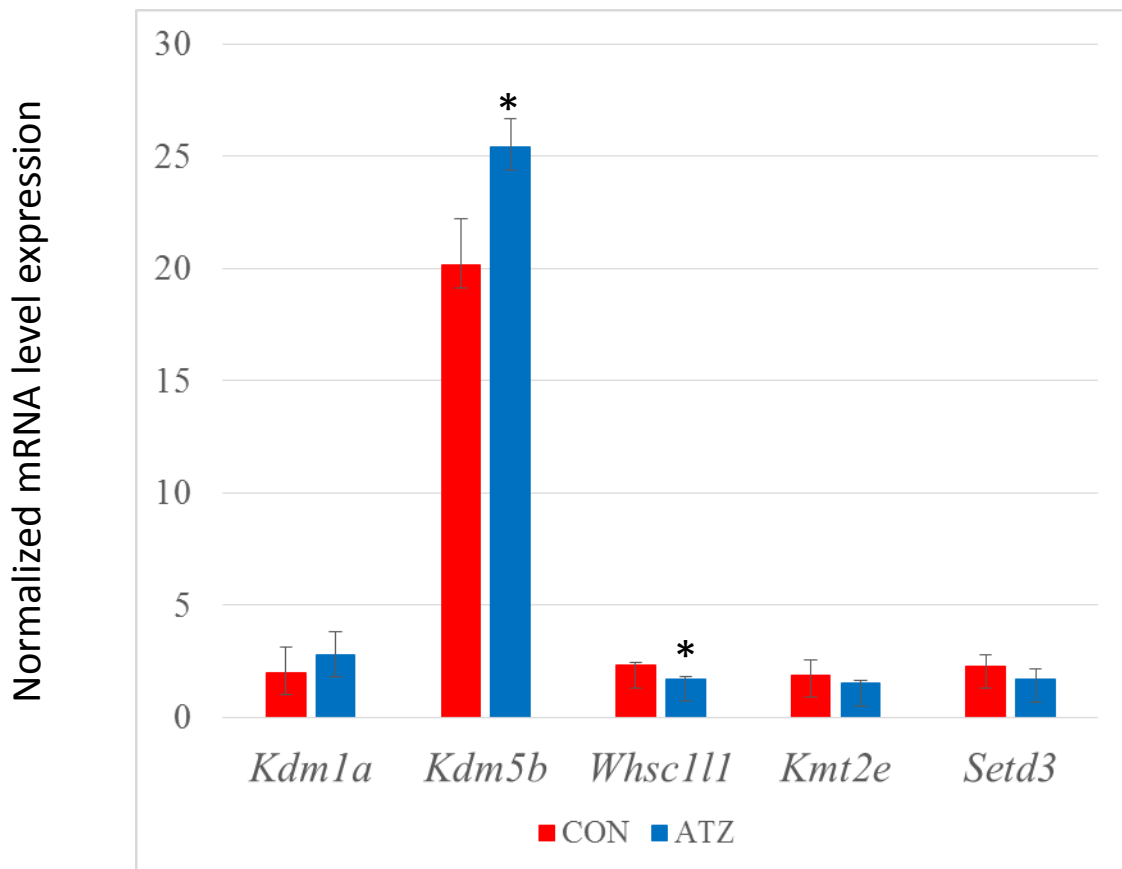

**Supplementary\_Figure\_S19.** The expression level of histone H3 lysine 4 methyltransferase mRNA (*Whsc1l1*) is decreased and the expression levels of histone H3 lysine demethylases (*Kdm5b*) is increased in the testes of F3 ATZ-lineage males.

The expression levels were determined using RNA-seq data. Each plot are represented as the averaged FPKM value of three biological replicates. FPKMs were calculated using the tag number. The control samples are in red, ATZ-derived samples in blue, \* $p < 0.05$ , t-test.

A

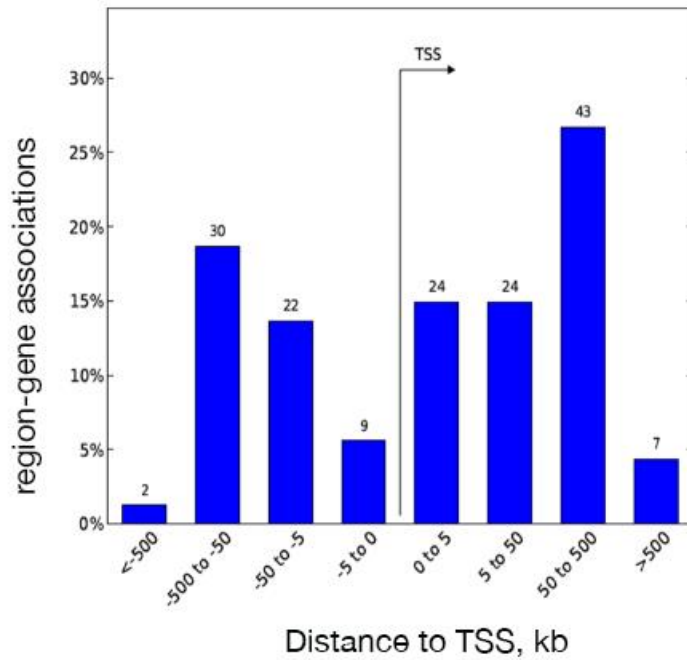

B

### GO Biological Process

Binomial Region Hits

| GO Biological Process                                 | 0 | 1 | 2 | 3 | 4 | 5 | 6 | 7 | 8 | 9 | 10 | 11 | Genes                                                                                   |
|-------------------------------------------------------|---|---|---|---|---|---|---|---|---|---|----|----|-----------------------------------------------------------------------------------------|
| epithelial cell development                           |   |   |   |   |   |   |   |   |   |   |    |    | <i>Slc26a3, Dicer1, Trip13, Mei1, Rapgef3, Sod1, Dmrt1, Sox18, Shroom3, Foxc2, Bbs4</i> |
| anatomical structure homeostasis                      |   |   |   |   |   |   |   |   |   |   |    |    | <i>Mapt, Dicer1, Fgfr1op, Spry1, Crocc, Bbs4</i>                                        |
| microtubule cytoskeleton organization                 |   |   |   |   |   |   |   |   |   |   |    |    | <i>Mapt, Dicer1, Fgfr1op, Spry1, Crocc, Bbs4</i>                                        |
| negative regulation of transferase activity           |   |   |   |   |   |   |   |   |   |   |    |    | <i>Fgfr1op, Spry1, Hexim2, Pif1, Zfyve28</i>                                            |
| multicellular organismal homeostasis                  |   |   |   |   |   |   |   |   |   |   |    |    | <i>Bbs4, Abca4, Arrdc3, Gpr98, Il20rb, Sod1</i>                                         |
| cellular component disassembly                        |   |   |   |   |   |   |   |   |   |   |    |    | <i>Apaf1, Arid2, Mtlf3, Mtrf1</i>                                                       |
| inorganic anion transport                             |   |   |   |   |   |   |   |   |   |   |    |    | <i>Ano6, Gabrb3, Slc26a3, Slc34a2</i>                                                   |
| nucleic acid phosphodiester bond hydrolysis           |   |   |   |   |   |   |   |   |   |   |    |    | <i>Apaf1, Dicer1, Dnase2a, Endou, Wm</i>                                                |
| inner ear receptor cell differentiation               |   |   |   |   |   |   |   |   |   |   |    |    | <i>Cux1, Dicer1, Gabrb3, Gpr98, Sod1</i>                                                |
| tissue homeostasis                                    |   |   |   |   |   |   |   |   |   |   |    |    | <i>Gpr98, Abca4, Bbs4, Sod1</i>                                                         |
| mechanoreceptor differentiation                       |   |   |   |   |   |   |   |   |   |   |    |    | <i>Gpr98, Cix1, Dicer1, Sod1, Gabrb3</i>                                                |
| response to insulin stimulus                          |   |   |   |   |   |   |   |   |   |   |    |    | <i>Foxc2, Ggh, Ipin1, Ptpn1, Sh2b2</i>                                                  |
| meiotic cell cycle                                    |   |   |   |   |   |   |   |   |   |   |    |    | <i>Spin1, Mei1, Spdy1, Trip13</i>                                                       |
| neural tube closure                                   |   |   |   |   |   |   |   |   |   |   |    |    | <i>Apaf1, Bbs4, Shroom3, Zic5</i>                                                       |
| ATP catabolic process                                 |   |   |   |   |   |   |   |   |   |   |    |    | <i>Abca4, Abca6, Abcc4, Wm</i>                                                          |
| primary neural tube formation                         |   |   |   |   |   |   |   |   |   |   |    |    | <i>Apaf1, Bbs4, Shroom3, Zic5</i>                                                       |
| tube closure                                          |   |   |   |   |   |   |   |   |   |   |    |    | <i>Apaf1, Bbs4, Shroom3, Zic5</i>                                                       |
| purine ribonucleoside monophosphate catabolic process |   |   |   |   |   |   |   |   |   |   |    |    | <i>Abca4, Abca6, Abcc4, Wm</i>                                                          |
| purine nucleoside monophosphate catabolic process     |   |   |   |   |   |   |   |   |   |   |    |    | <i>Abca4, Abca6, Abcc4, Wm</i>                                                          |
| nucleoside monophosphate catabolic process            |   |   |   |   |   |   |   |   |   |   |    |    | <i>Abca4, Abca6, Abcc4, Wm</i>                                                          |

### Supplementary\_Figure\_S20. Differential H3K4me3 peaks in spermatocyte fraction in testis of F3 ATZ-derived males are enriched in regions of genes involved in epithelial cell development and cytoskeleton organization

Differential H3K4me3 peaks were compared with normalized peaks intensity from purified spermatocytes or spermatids. (A) The distance of differential peaks to TSS of the genes, (B) The subset of differential H3K4me3 peaks with high signal in spermatocytes were annotated with GREAT. The GO term of biological function is shown on the left, the corresponding genes are on the right.

A

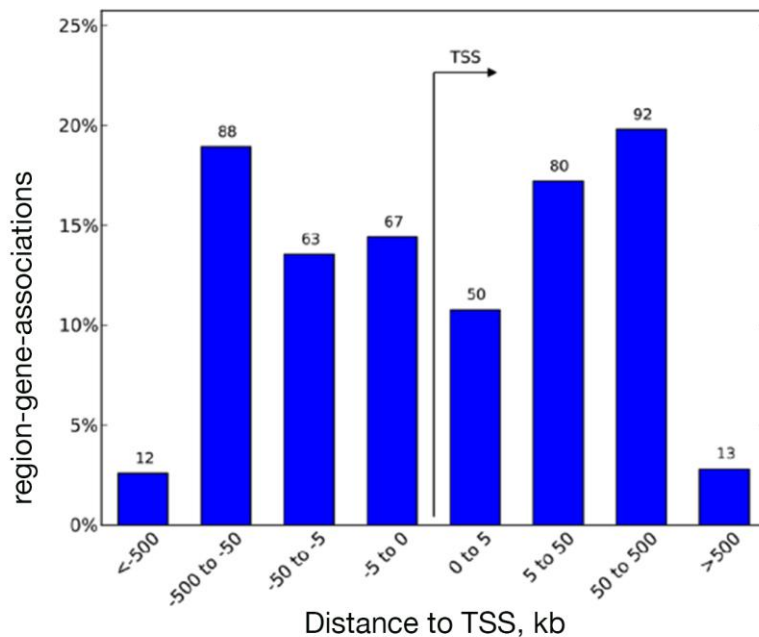

B

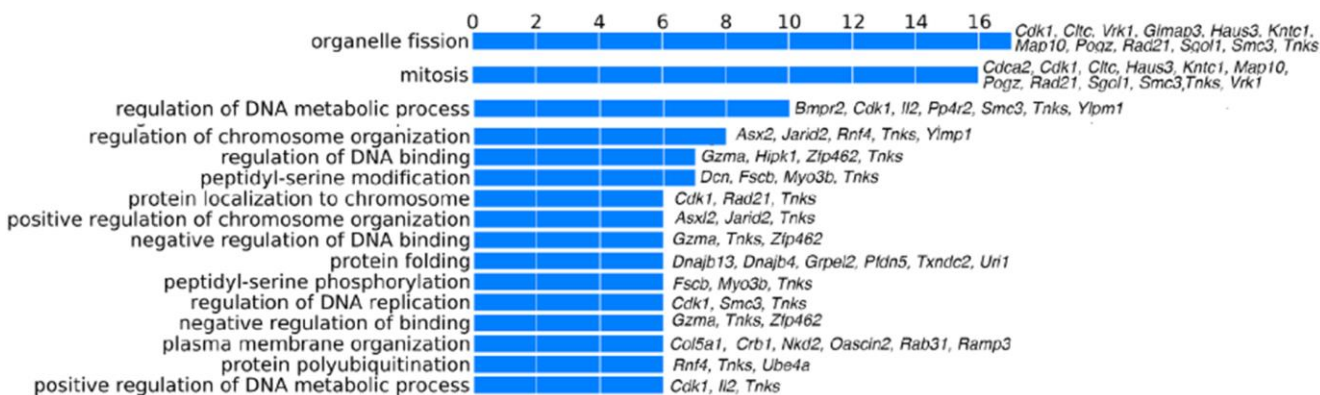

**Supplemental\_Figure\_S21. Differential H3K4me3 peaks in spermatocyte fraction in F3 ATZ-derived males are enriched in regions of genes involved in mitosis.**

Differential H3K4me3 peaks were compared with normalized peaks intensity from purified spermatocytes or spermatids. (A) The distance of differential peaks to TSS of the gene. (B) The subset of h3K4me3 peaks with high signal in spermatids were annotated with GREAT. The GO term of biological function is shown on the left, the corresponding genes are on the right.

A

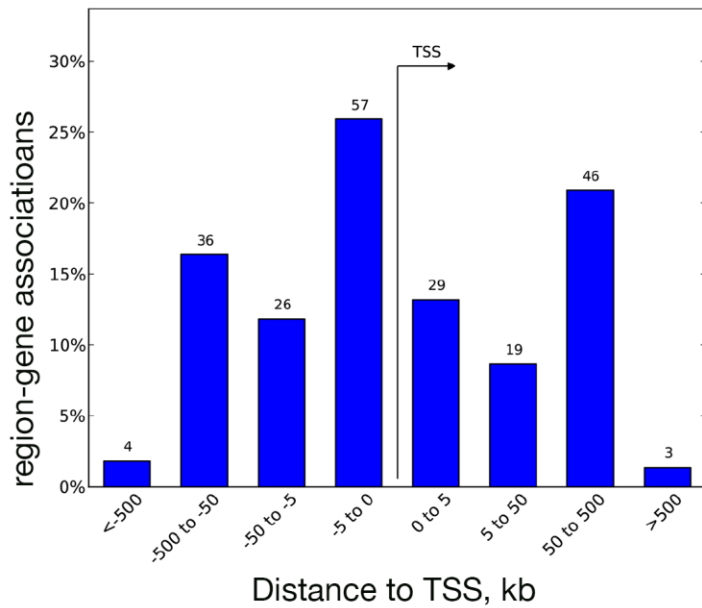

B

### GO Biological Process

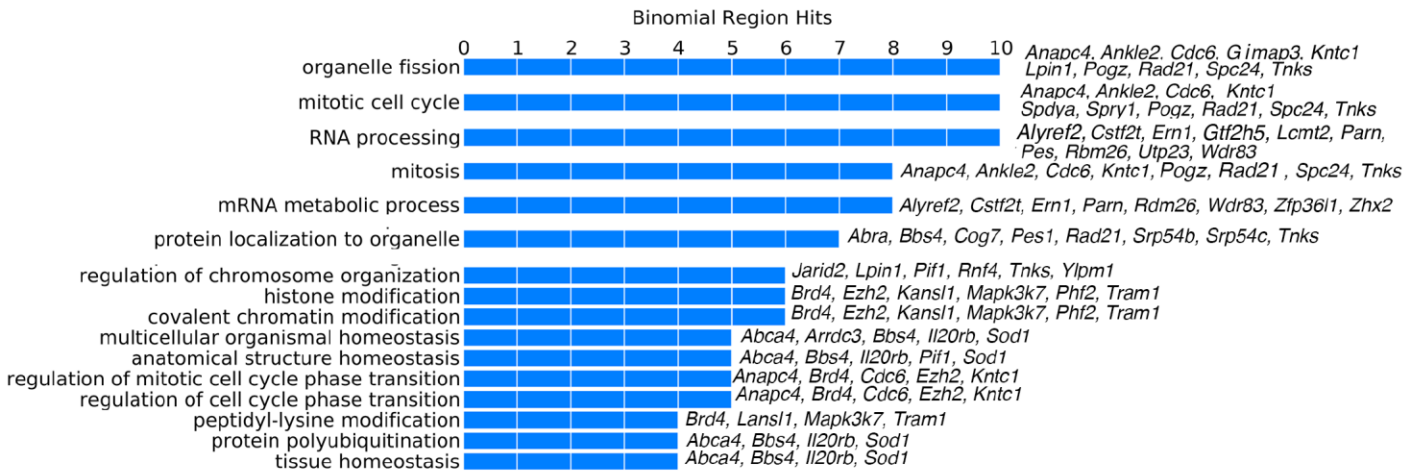

### Supplementary\_Figure\_S22. Differential H3K4me3 peaks in spermatogonia fraction in F3 ATZ-derived males are enriched in regions for the genes associated with cell cycle, mitosis and RNA processing functions

Differential H3K4me3 peaks were compared with published datasets. ( A) The distance of differential peaks to TSS of the genes, B) The subset of peaks with high signal in spermatogonia were annotated with GREAT. The GO term of biological function is shown on the left, the corresponding genes are on the right.



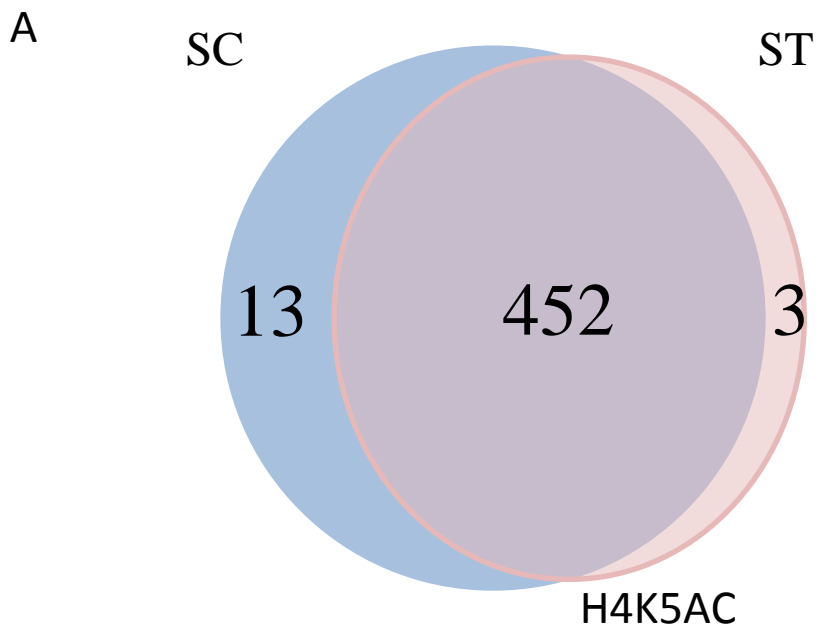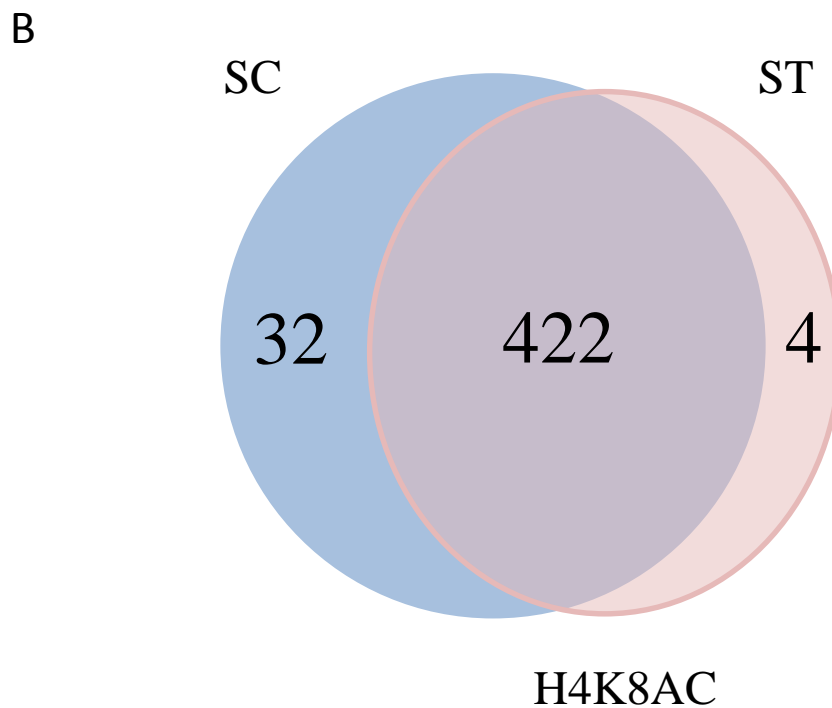

**Supplementary\_Figure\_S23. The association of differential H3K4me3 peaks in F3 ATZ-derived males with H4K5Ac and H8K8ac marks from spermatocyte and spermatid fractions .**

Differential H3K4me3 peaks from testis of F3 ATZ progeny ChIP-seq data were compared with published H4K5Ac and H4K8ac datasets. (A) The venn diagrams of differential peaks of testis fractions with H4K5Ac and (B) The venn diagrams of differential peaks of testis fractions with H4K8ac. SC(Spermatocytes), ST(Spermatids).

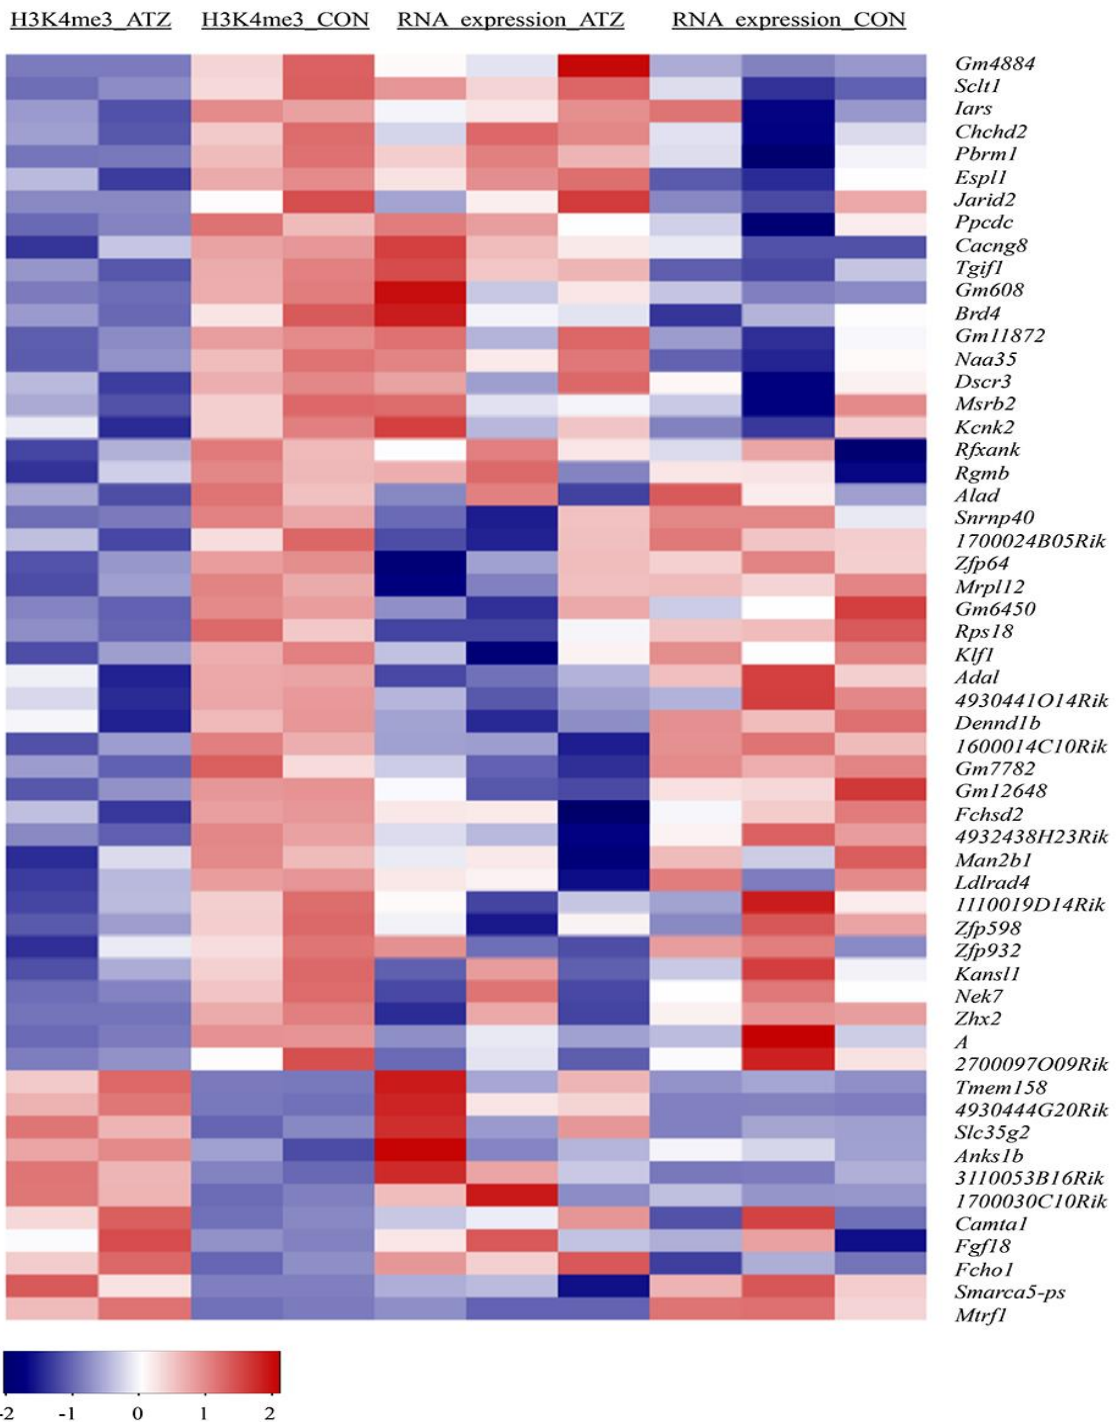

**Supplementary\_Figure\_S24: The association of intensity of differential H3K4me3 at promoters with altered gene expression level (FC>1.2) .**

H3K4me3 differential peaks associated with promoters were identified using published datasets based on signal ratio of H3K4me1 to H3K4me3. From all differential peaks, we found only 26% of them are associated with gene promoters. We presented here the signal for ChIP and corresponding RNA expression. Each column represents a biological replicate. Up-regulated genes and peaks with increased H3K4me3 occupancy are depicted in red, down-regulated RNA and peaks with decreased H3K4me3 occupancy in blue.

**A**

| Chr   | Start     | End       | P-val | FDR   | peak presence in ATZ | Nearest Differentially expressed RNA | Fold Change RNA | type RNA              |
|-------|-----------|-----------|-------|-------|----------------------|--------------------------------------|-----------------|-----------------------|
| chr11 | 110041351 | 110042160 | 0,002 | 0,078 | no                   | <i>Abca9</i>                         | 1.2             | coding, novel isoform |
| chr4  | 140820871 | 140821290 | 0,007 | 0,078 | no                   | <i>Arhgef19</i>                      | 0,7             | coding, novel isoform |
| chr1  | 169171501 | 169171621 | 0,001 | 0,043 | no                   | <i>Uck2</i>                          | 0,6             | coding, novel isoform |
| Chr8* | 35142601  | 35144570  | 0,011 | 0,078 | no                   | Intergenic RNA                       | 0,6             | novel isoform         |
| chr10 | 21778021  | 21779480  | 0,006 | 0,065 | yes                  | Intergenic RNA                       | 21,0            | novel isoform         |
| Chr8  | 36322681  | 36324820  | 0,003 | 0,078 | no                   | Intergenic RNA                       | 0,8             | novel isoform         |
| chr10 | 21787571  | 21787970  | 0,002 | 0,043 | yes                  | 4930444G20Rik                        | 3,0             | protein coding        |
| chr13 | 66815341  | 66815900  | 0,012 | 0,078 | no                   | Intergenic RNA                       | 0,8             | novel isoform         |
| chr7  | 46435861  | 46436150  | 0,000 | 0,073 | no                   | Intergenic RNA                       | 0,3             | novel isoform         |

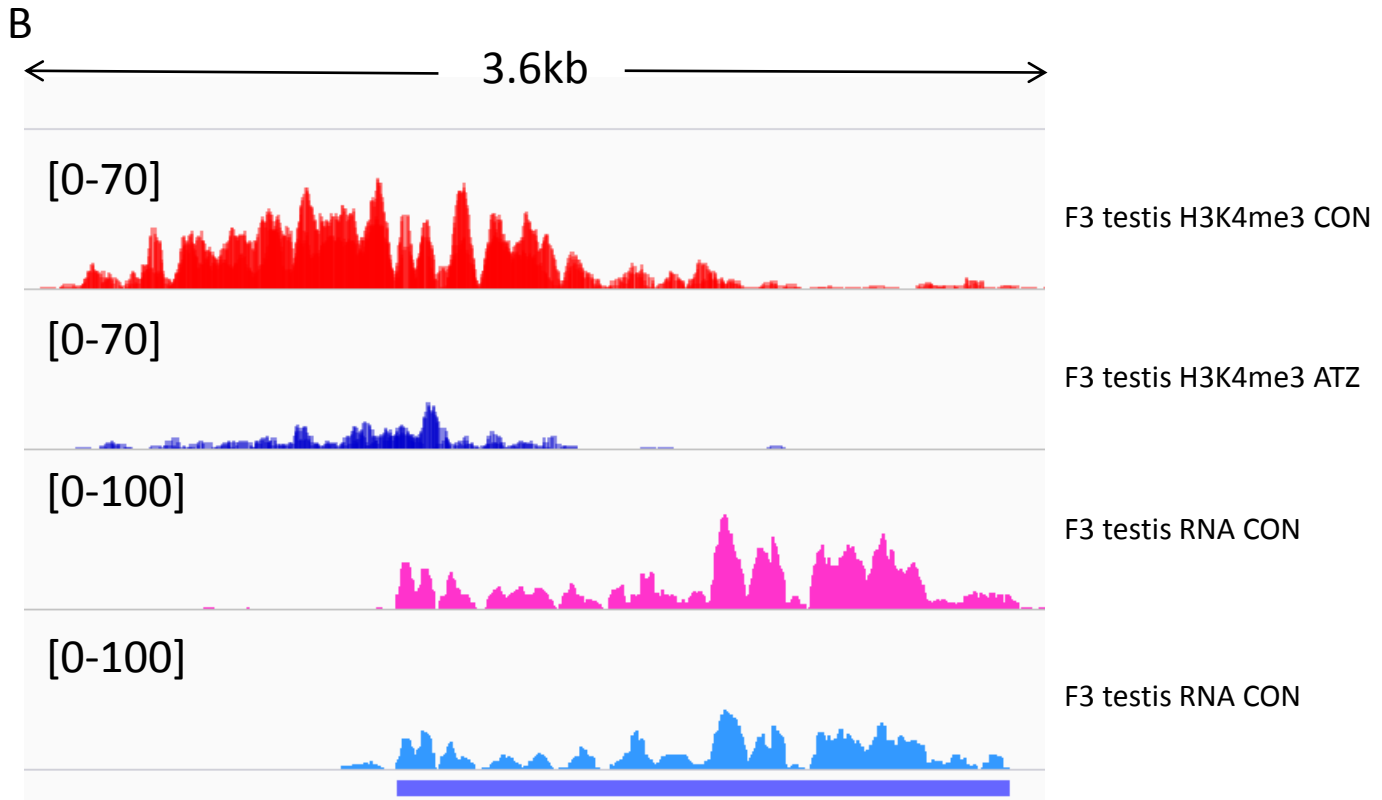

**Supplementary\_Figure\_S25. Differential H3K4me3 peaks lost or gained in F3 ATZ-derived males**

(A) Differential H3K4me3 peaks from testis of F3 ATZ progeny ChIP-seq data (chr8:35142601-35144570). (B) An example of a very low peak intensity in **F3 ATZ-derived males** near intergenic RNA expression

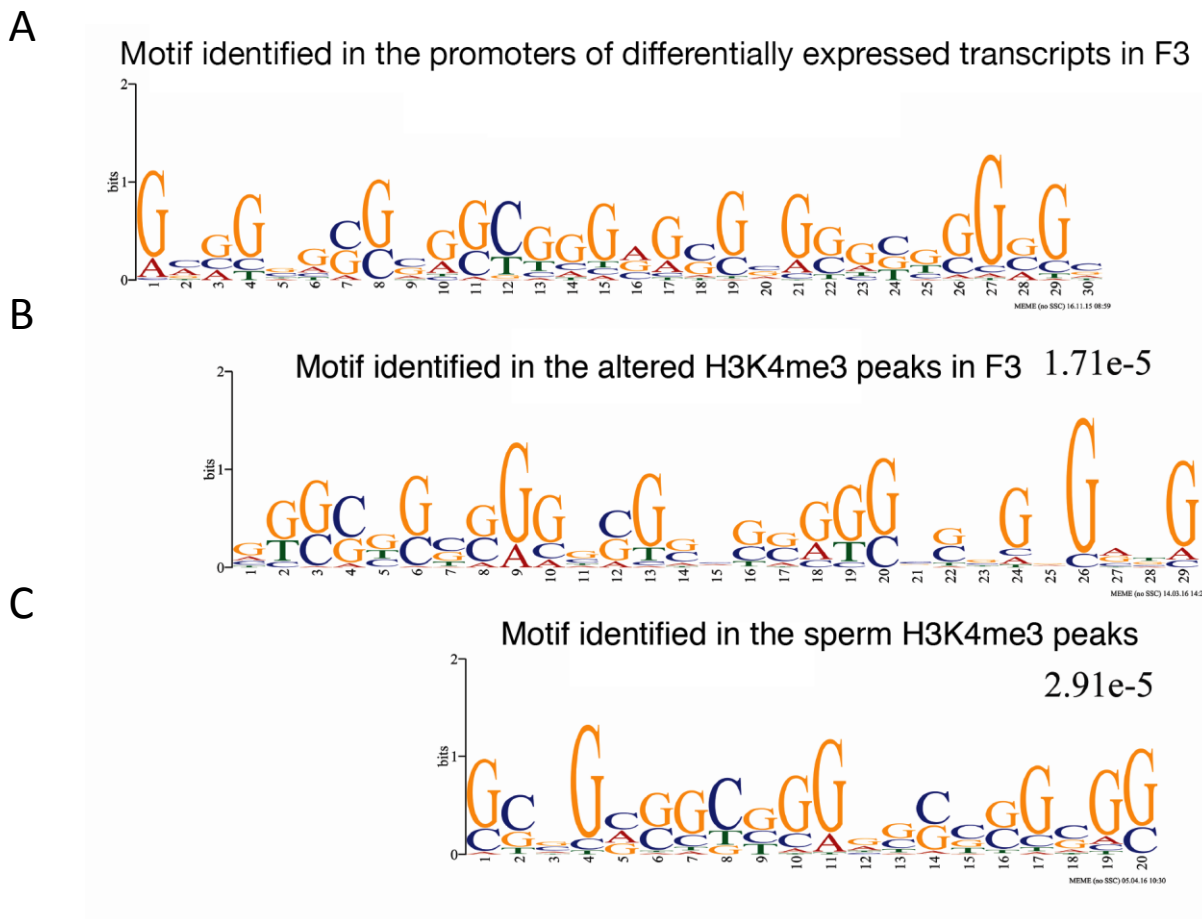

**Supplementary\_Figure\_S26.** The enriched motifs identified in the promoters of new RNA transcripts, the differential H3K4me3 peaks in F3 ATZ-derived males and the strongest peaks in sperm are similar.

(A) The motif enrichment was identified 500 bp upstream of the TSSs of transcripts with alternative TSSs in F3 ATZ-derived males. (B) Motif found in differential H3K4me3 peaks in F3 ATZ-derived males. (C) Motif found in the strongest H3K4me3 peaks identified during sperm histone retention analysis (Erkek et al. 2013 ). The MEME application was used as described in the Methods section, and the *q-value* of similarity between top and down motifs was estimated by TomTom.

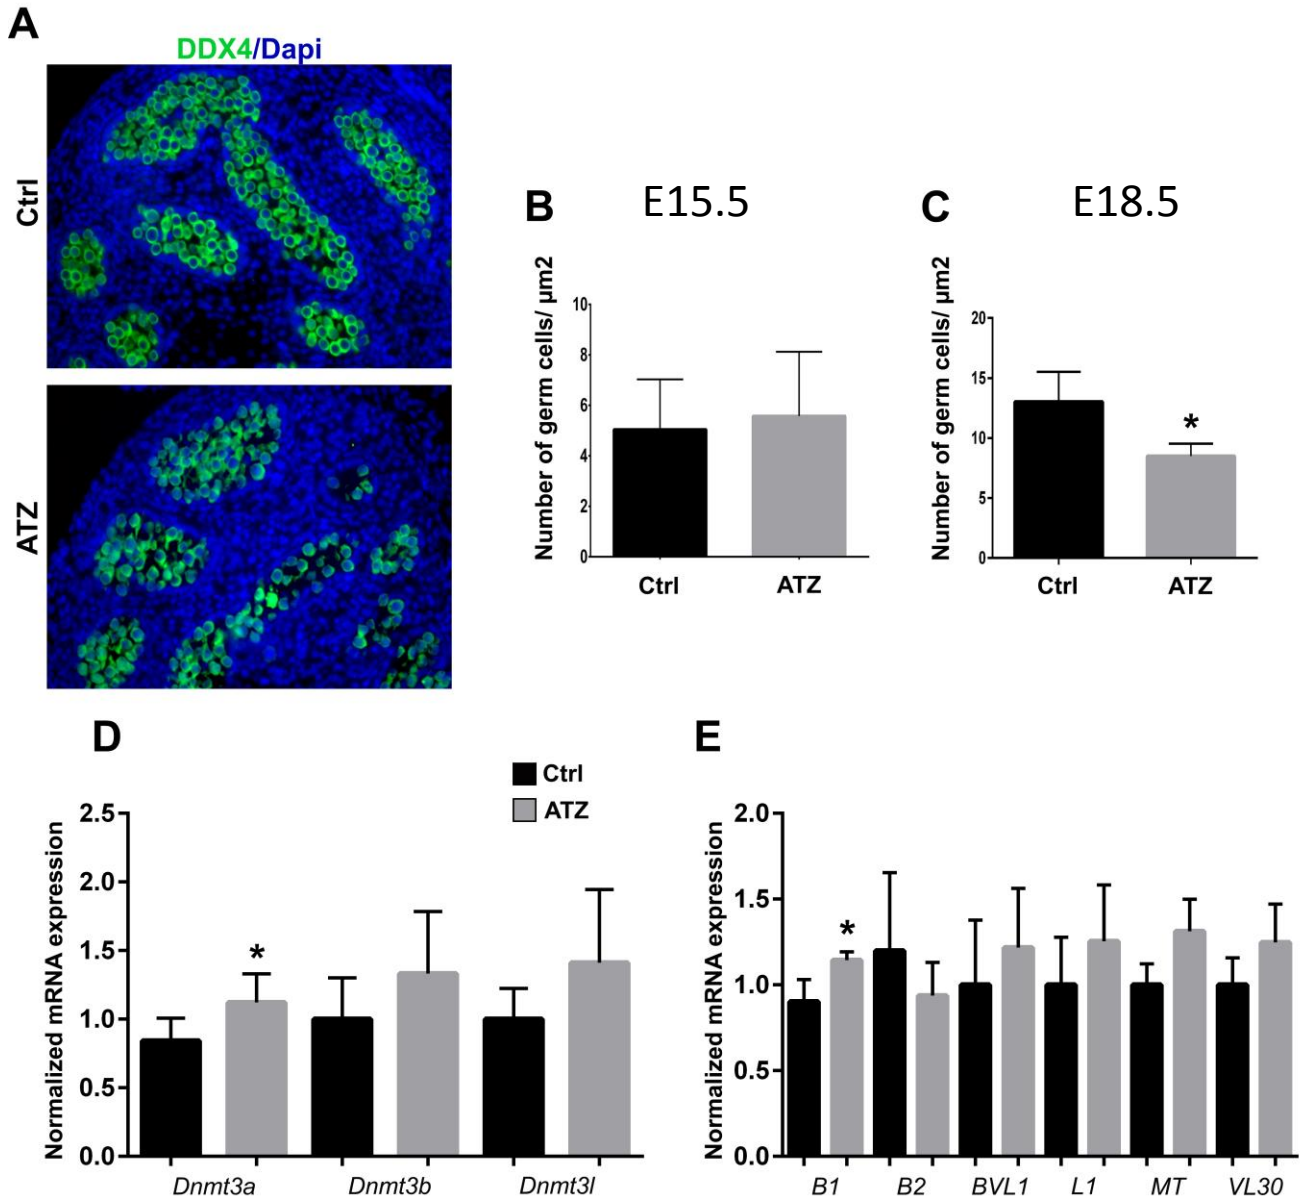

**Supplementary\_Figure\_S27. Germ cell analysis in F1 ATZ exposed male embryos.**

The testes from F1 control or ATZ exposed males were fixed with PFA and paraffin slides were prepared as described in Supplementary Methods. A) The sections were immunostained against anti- DDX4 antibody, a marker of germ cells. (B) The number of germ cells were counted in three biological replicates, B) at E15,5 and C) at E18.5. D) QPCR analysis of *de novo* DNA methyltransferases from E18.5 male gonads, total RNA was extracted as described in Material and Methods and RT PCR was performed using n=5, \*, p<0.05, t-test, E) qPCR analysis of retroelements, n=5, \*, p<0.05, t-test.

## Pearson correlation coefficients for RNA-seq and H3K4me3 ChIP-seq samples

## Pearson correlation coefficients of RNA-seq samples

A

|       | ATZ_1 | ATZ_2 | ATZ_3 | CON_1 | CON_2 | CON_3 |
|-------|-------|-------|-------|-------|-------|-------|
| ATZ_1 | 1.00  | 0.98  | 0.96  | 0.94  | 0.85  | 0.97  |
| ATZ_2 | 0.98  | 1.00  | 0.93  | 0.96  | 0.89  | 0.98  |
| ATZ_3 | 0.96  | 0.93  | 1.00  | 0.91  | 0.80  | 0.94  |
| CON_1 | 0.94  | 0.96  | 0.91  | 1.00  | 0.94  | 0.96  |
| CON_2 | 0.85  | 0.89  | 0.80  | 0.94  | 1.00  | 0.85  |
| CON_3 | 0.97  | 0.98  | 0.94  | 0.96  | 0.85  | 1.00  |

## Pearson correlation coefficients of ChIP-seq samples

B

|       | ATZ_1 | ATZ_2 | CON_1 | CON_2 |
|-------|-------|-------|-------|-------|
| ATZ_1 | 1.00  | 0.94  | 0.96  | 0.96  |
| ATZ_2 | 0.94  | 1.00  | 0.93  | 0.92  |
| CON_1 | 0.96  | 0.93  | 1.00  | 0.97  |
| CON_2 | 0.96  | 0.92  | 0.97  | 1.00  |

## Differentially expressed genes in F3 ATZ-derived testes, functionally annotated by DAVID.

| Term Name                             | Number of genes | P Value | Genes                                                                                                                                                                                                                                                                                                                                                                                                                                                                                                                                                                                                                                                                                                                                                                                                                                                                                                                               |
|---------------------------------------|-----------------|---------|-------------------------------------------------------------------------------------------------------------------------------------------------------------------------------------------------------------------------------------------------------------------------------------------------------------------------------------------------------------------------------------------------------------------------------------------------------------------------------------------------------------------------------------------------------------------------------------------------------------------------------------------------------------------------------------------------------------------------------------------------------------------------------------------------------------------------------------------------------------------------------------------------------------------------------------|
| response to DNA damage stimulus       | 17              | 0.001   | <b>up regulated in ATZ :</b> <i>Cdk1, Pgap2, Ssrp1, Nbn, Usp1, Morf4l2, Xab2, Ercc8, Pnkp, Chd1l, Rif1, Bre, Fbxo6, Mus81, Bcl3, Rev3l</i> ; <b>down regulated in ATZ:</b> <i>Mms19, Ercc8, Bre, Mus81</i>                                                                                                                                                                                                                                                                                                                                                                                                                                                                                                                                                                                                                                                                                                                          |
| nucleotide binding                    | 71              | 0.006   | <b>up regulated in ATZ:</b> <i>Kif23, Rnasel, Gtpbp10, Aurkc, Slfn5, Mcm7, Clp1, Ndufs2, Rdm1, Cdk1, Nadsyn1, Arl9, Cdkl3, Stk4, Dapk3, Mark2, Pnkp, Glul, Hhat, NrK, Srxn1, Rev3l, Enox1, Prps1, Abca2, Chd1l, Ddx19a, Rab11a, Nat10, Prkaa1, Mat2a, Safb2, Epha7, Tubal3, Pprc1</i> ; <b>down regulated in ATZ:</b> <i>Acvrl1, Rps6kb2, Lace1, Dhx34, Nlrp4e, Pdxk, Hsp90aa1, Pik3cd, Ptbp1, Ifi47, Pkdcc, Rfc5, Rfc1, Ube2m, Aars2, Clcn3, Chkb, Hk2, Irak4, Igtp, Naip2, Ptk2b, Hnrnpd, Guf1, Rbm26, Pdk2, Chdh, Axl, Idh3b, Psm8, Acsm3, Cirbp, Aox3, Tnk2, Cit, Katnal1</i>                                                                                                                                                                                                                                                                                                                                                   |
| ion binding                           | 115             | 0.011   | <b>up regulated in ATZ:</b> <i>Rnasel, Zfp94, Plod1, Clp1, Rnf219, Luc7l2, Rps27a, Stk4, Mark2, Srxn1, Prps1, Zfp619, Nr2c2, Pxn, Wt1, Trim68, Mbnl3, B4galt4, Trpc1, Klf12, Zbtb42, Cblb, Dohh, Klf2, Cyb5r4, Kcnab1, Npnt, Zfp644, Kcnq3, P4ha3, Ndufs2, Zswim2, Dnajc24, Rev3l, Enox1, Inpp1, Ing3, Repl1, Eri2, Gatad2b, Slc39a7, Prkaa1, Cybasc3, Dtna, Mat2a, Sun1, Racgap1, Anxa4, Itpr2, Zc3h11a, Gca</i> ; <b>down regulated in ATZ :</b> <i>Gm8935, Rabgef1, Dhx34, Zfp688, Pdxk, Polg, Nudt14, Zfp78, Nbr1, Fxyd1, Clcn3, Cacnb4, Ttc3, Irak4, Sgip1, Esrrb, Idh3b, Myl12b, Trim63, Zfp579, Frem1, Tnk2, Cryzl1, Acvrl1, Lyar, Phf23, Pcgf3, Trim6, Zfp1, Gatad1, Kdm5b, Zcchc7, Zcchc8, Gmpr, Gpr98, Cyp27a1, Adam17, Zfpm2, Haghl, Ppm1m, Mecr, Lims2, Ecel1, Glis1, Zbtb16, Dchs1, Rnf123, Naip2, Mus81, Eno3, Scnm1, Rbm26, Adarb1, Cyp21a1, Trim28, Mid1, Capn3, Manba, Acsm3, Plscr2, Rassf1, Aox3, Cit, Scn4a</i> |
| multicellular organism reproduction   | 20              | 0.004   | <b>up regulated in ATZ :</b> <i>Tdrd7, Htt, Il11ra1, Racgap1, Hmga1, Wt1, Nr2c2, Calca, Gm2854, Gm2790, Prmt7, Gm14332, Gm3763, Chrna7, Spata6, Gm2964</i> ; <b>down regulated in ATZ :</b> <i>Cav1, Tmbim6, Hk2, Zbtb16, Sbf1, Creb3l4, Cit</i>                                                                                                                                                                                                                                                                                                                                                                                                                                                                                                                                                                                                                                                                                    |
| amine biosynthetic process            | 7               | 0.007   | <b>up regulated in ATZ :</b> <i>Bcat1, Chdh, Glul, Mat2a, Chrna7</i> ; <b>down regulated in ATZ :</b> <i>Chdh, Asl, Prodh</i>                                                                                                                                                                                                                                                                                                                                                                                                                                                                                                                                                                                                                                                                                                                                                                                                       |
| mitochondrion                         | 47              | 0.011   | <b>up regulated in ATZ :</b> <i>Bcat1, Mrps34, Rnasel, Cyb5r2, Tdrd7, Acp6, Gtpbp10, 1700021f05rik, Ndufs5, Stard4, Rab11a, Atp5h, Adck4, Ndufs2, Atpaf2, Park7, Pex11b, Glul, Mtrf1, Phb2</i> ; <b>down regulated in ATZ :</b> <i>Cav1, Gcat, Hk2, Chchd3, Bnip3, Stoml2, Ccdc58, Lace1, Mrpl55, Guf1, Cox18, Gtf3c2, Sardh, Cox16, Chdh, Pdk2, Mmadhc, Polg, Fdxr, Idh3b, Acsm3, Cyp27a1, Mrpl48, Aars2, Surf1, Mecr, Prodh</i>                                                                                                                                                                                                                                                                                                                                                                                                                                                                                                   |
| intracellular organelle lumen         | 40              | 0.022   | <b>up regulated in ATZ :</b> <i>Midn, Ing3, Tdrd7, Gtpbp10, Sox6, Senp5, Wt1, Blzf1, Grwd1, Gm3763, P4ha3, Nat10, Dcaf17, Rdm1, Tead2, Sun1, Carf, Med6, Trpc4ap, Pop4, Gm2964</i> ; <b>down regulated in ATZ :</b> <i>Lyar, Bnip3, Zbtb16, Tcf7l2, Ercc8, Mus81, Mrpl55, Sardh, Olfm1, Pdk2, Polg, Trim28, Fdxr, Smad2, Acsm3, Cirbp, Pbx1, Hdac9, Aars2, Prodh</i>                                                                                                                                                                                                                                                                                                                                                                                                                                                                                                                                                                |
| lymphocyte activation                 | 11              | 0.015   | <b>up regulated in ATZ :</b> <i>Cblb, Nbn, Il11ra1, Bcl3, Chrna7</i> ; <b>down regulated in ATZ :</b> <i>Pik3cd, Adam17, Cacnb4, Fas, Hdac9, Ncor1</i>                                                                                                                                                                                                                                                                                                                                                                                                                                                                                                                                                                                                                                                                                                                                                                              |
| vesicle-mediated transport            | 19              | 0.028   | <b>up regulated in ATZ :</b> <i>Stx3, Caly, Htt, Hook2, Blzf1, Gapvd1, Stxbp5, Exoc4, Chrna7</i> ; <b>down regulated in ATZ :</b> <i>Cav1, Dennd1a, Ap4m1, Vps33b, Cd36, Stx16, Zfp1, Rabgef1, Snap23, Cox16</i>                                                                                                                                                                                                                                                                                                                                                                                                                                                                                                                                                                                                                                                                                                                    |
| G2/M transition DNA damage checkpoint | 3               | 0.027   | <b>up regulated in ATZ :</b> <i>Cdk1, Nbn</i> ; <b>down regulated in ATZ :</b> <i>Bre</i>                                                                                                                                                                                                                                                                                                                                                                                                                                                                                                                                                                                                                                                                                                                                                                                                                                           |

## Differentially expressed genes in F3 ATZ-derived Liver, functionally annotated by DAVID.

| <b>Term Name</b>    | <b>Number of genes</b> | <b>P -value</b> | <b>Genes</b>                                                  |
|---------------------|------------------------|-----------------|---------------------------------------------------------------|
| oxidation reduction | 8                      | 0.001           | <i>Me1, Cyp2c44, Akr1b3, Glud1, Pgd, Cat, Dus1l, Hadha</i>    |
| mitochondrion       | 8                      | 0.040           | <i>Me1, Mtrf1, Glud1, Slc25a22, Mtcp1, Cat, Timm23, Hadha</i> |



## Differentially expressed genes in F3 ATZ-derived brain

| ID                   | Gene Name                                                                  | GOTERM_BP_FAT                                                                                                                                                                           |
|----------------------|----------------------------------------------------------------------------|-----------------------------------------------------------------------------------------------------------------------------------------------------------------------------------------|
| <i>Pdk1</i>          | 3-phosphoinositide dependent protein kinase-1                              | May play a general role in signaling processes and in development                                                                                                                       |
| <i>Arl16</i>         | ADP-ribosylation factor-like 16                                            | Nucleotide binding, GTP binding, purine nucleotide binding, guanyl nucleotide binding, ribonucleotide binding                                                                           |
| <i>B9d1</i>          | B9 protein domain 1                                                        | Specifically or prominently expressed in mouse blastocysts compared to 4-cell stage embryos                                                                                             |
| <i>Thumpd1</i>       | THUMP domain containing 1                                                  | acetylation, phosphoprotein,                                                                                                                                                            |
| <i>Wwp2</i>          | WW domain containing E3 ubiquitin protein ligase 2                         | E3 ubiquitin-protein ligase which accepts ubiquitin from an E2 ubiquitin-conjugating enzyme in the form of a thioester and then directly transfers the ubiquitin to targeted substrates |
| <i>Nnat</i>          | neuronatin                                                                 | May participate in the maintenance of segment identity in the hindbrain and pituitary development                                                                                       |
| <i>Nvl</i>           | nuclear VCP-like                                                           | Nucleotide binding, nucleoside binding, purine nucleoside binding, ATP binding                                                                                                          |
| <i>4933434E20Rik</i> | RIKEN cDNA 4933434E20 gene                                                 | ND                                                                                                                                                                                      |
| <i>Gm8399</i>        | predicted gene 8399                                                        | ND                                                                                                                                                                                      |
| <i>Gm6189</i>        | predicted gene 6189                                                        | ND                                                                                                                                                                                      |
| <i>Psmc3ip</i>       | proteasome (prosome, macropain) 26S subunit, ATPase 3, interacting protein | Plays an important role in meiotic recombination                                                                                                                                        |
| <i>Slc1a5</i>        | solute carrier family 1 (neutral amino acid transporter), member 5         | Insulin-dependent transporter for L-serine and, to a lesser extent, uptake of L-alanine and L-glutamate                                                                                 |
| <i>Tns1</i>          | tensin 1                                                                   | Cell motion, cell-substrate junction assembly, cell migration, cell junction assembly, cell junction organization, cell motility, localization of cell,                                 |
| <i>Txn2</i>          | thioredoxin 2                                                              | Has an anti-apoptotic function and plays an important role in the regulation of mitochondrial membrane potential                                                                        |
| <i>Trim26</i>        | tripartite motif-containing 26                                             | Zinc ion binding, ion binding, cation binding, metal ion binding, transition metal ion binding                                                                                          |
| <i>Zbtb25</i>        | zinc finger and BTB domain containing 25                                   | DNA binding, zinc ion binding, ion binding, cation binding, metal ion binding, transition metal ion binding,                                                                            |
| <i>Gm25736</i>       | predicted gene 25736                                                       | ND                                                                                                                                                                                      |
| <i>Gm25475</i>       | predicted gene 25475                                                       | ND                                                                                                                                                                                      |
| <i>Gm22771</i>       | predicted gene 22771                                                       | ND                                                                                                                                                                                      |
| <i>Rps2-ps10</i>     | ribosomal protein S2, pseudogene 10                                        | ND                                                                                                                                                                                      |

## Differentially expressed new mRNA isoforms in F3 ATZ-derived testis

|                 |                                                                                                                                                                                                                                                                                                                                                                                                                                                                                                                                                                                                                                                                                                                                                                                                                                                                                                                                               |
|-----------------|-----------------------------------------------------------------------------------------------------------------------------------------------------------------------------------------------------------------------------------------------------------------------------------------------------------------------------------------------------------------------------------------------------------------------------------------------------------------------------------------------------------------------------------------------------------------------------------------------------------------------------------------------------------------------------------------------------------------------------------------------------------------------------------------------------------------------------------------------------------------------------------------------------------------------------------------------|
| extended TSS    | <p><b>exon gained:</b> <i>Klf12, Gm13318, Htt, Specc1, Gatad2b, Xkr7, 9130204L05Rik, Scn4a, Gm1043, Zscan30, Zfp78, A630077J23Rik, Gm7120, 4930432E11Rik, Elp5, Slfn5, Nxn12, Mark2, Ccdc28a, Gm13794, 4930443O20Rik, Itfg2, 1700128F08Rik, Ptk2b, Psmb8, Gm21982, Poteg, Gm13853, Gm16347, 1700026J12Rik, Hbb-bs</i> ; <b>exon number no difference:</b> <i>Scgb2b22-ps, Stard8, Prrc2b, Scgb2b23-ps, Zfp619, Pglyrp4, Lca5, 1700021L23Rik, Naip2, Plod1, Arl9, Slc19a1, Katnal1, Gm13794, Kihl15, Tex101, Fam186a, Safb2, Pkdcc, Tspan8, Mmadhc, 1110004E09Rik, Nlrp4e, Ifi27, Anxa4, 4930444M15Rik, Dennd1a, Supt20, Blzf1</i>; <b>exon loss:</b> <i>Bre, Zfp951, Igf2, Gm17359, Tubal3, Luc7l2, Prodh, Stx16, Kazald1, Zcchc8, Stag3, Nup35, Gpaal1, Clp1, Prep, 2410002F23Rik, Gm8540, If7, Gm21982, Gm10125, Igtp, Nadsyn1, Nudt14, Racgap1, Rgs11, Trpc1</i></p>                                                                       |
| shortened TSS   | <p><b>exon gained:</b> <i>Cyb5r2, Zc3h11a, Creb3l4, Tmem8, Srxn1, Tmem123, Gm21982, Gtf3c2, Gm7205</i>; <b>exon number no difference:</b> <i>Usp25, Nbn, Gm12973, Slc35a5, Rnf219, Trim6, Prkaa1, Hhipl2, Chd1l, Gm14012, Phf23, Pcgf3, Slc6a7, Tprn, Cyp27a1, Veph1, Epm2a, 1700057H15Rik, Sox6, Adarb1, Esrrb, Kcnq3</i>; <b>exon loss:</b> <i>Ap4m1, Ssrp1, Cers5, Chmp3, Rgcc, Ifit2, Gm14012, Maged2, Myom2, Klf2, Rnasel, Cul5, Serinc2, Calca, Tmem123, Gtpbp10, Apoc2, Gm21982, Rbm48, Phyhip, Hook2, Gm8540, Bcl3, Sun1, Dcun1d4, Epb4.1l1, Vangl2, Paqr3, 9230104L09Rik, Kihl25, Ptprf, Klrb1, P4ha3, Nmrk1, Pdxk, Mecr, Vmn2r19, Hif3a, Cblb, Fam105b, Pik3cd, Unc45b, Fas, Wdr78, Serac1, Tdrd5, Slc39a12, Pxn, Akap9, Fndc1, Rftn1, Cox16, Gzmk, Col6a6, Gm13490, A530072M11Rik, Rasgrf1, Hapln1, Serinc5, Flnb, Cit, Btrc, Col4a4, Mid1, Lhfpl2, Kcnab1, Ppp1r12b, Frem1, Glis1, Hhat, Hdac9, Dtna, Gabbr2, Maml3, Nrg3</i></p> |
| non altered TSS | <p><b>exon gained:</b> <i>Zfp644, Serpine2, Atpaf2, Tanc1, Hsp90aa1</i>; <b>exon number no difference:</b> <i>Cwc22, Prss38, Cops3, Hap1, Inpp1, Rfc1, Gm14012</i>; <b>exon loss:</b> <i>Gm8935, E330020D12Rik, Cwc22, Rbm26, BC029214, Serp2, Dennd6b, Gm14012, Surf1, Idh3b, Flii, Trim68, Lrwd1</i></p>                                                                                                                                                                                                                                                                                                                                                                                                                                                                                                                                                                                                                                    |

## Differentially expressed new mRNA isoforms in F3 ATZ-derived testis

|                                             |                                                                                                                                                                                                                                                                                                                                                                                                                                                                                                                                                                                                                                                                                                                                                                                                                                                                                                                                                                                     |
|---------------------------------------------|-------------------------------------------------------------------------------------------------------------------------------------------------------------------------------------------------------------------------------------------------------------------------------------------------------------------------------------------------------------------------------------------------------------------------------------------------------------------------------------------------------------------------------------------------------------------------------------------------------------------------------------------------------------------------------------------------------------------------------------------------------------------------------------------------------------------------------------------------------------------------------------------------------------------------------------------------------------------------------------|
| transcripts with additional exons at 3' UTR | 1700128F08Rik, Poteg, Gm13794, Gm13318, Gm8935, Zfp644, Gm7205, lqcj, Gm1043, E330020D12Rik, Klhl15, Gm16347, Gtf3c2, Cwc22, lgtf, Ifnar2, Kcnq3, Rbm26, 2610020H08Rik, 4930432E11Rik, 1700128F08Rik, Calca, 1700057H15Rik, Gm13853, Gatad2b, Klf12, Ifit2, Dcun1d4, Cit, Cblb, Cblb, Col4a4, Katnal1, 9230104L09Rik, Zfp78, Gm8540, Gm8540, Gm8540, Gm14012, Safb2, Creb3l4, Zc3h11a, Trpc1, Nrg3, Mark2, Col6a6, 2410002F23Rik, A630077J23Rik, Arl9, Prss38, Pxn, Zfp951, Luc7l2, Specc1, Serinc2, Ceacam3, Klrb1, Nudt14, Srxn1, Trim6, Gzmk, Mid1, Bre, Serpine2, Scgb2b23-ps, Scgb2b23-ps, Scgb2b22ps, Slc35a5, Slc35a5, Cox16, Scn4a, Slc6a7, Hif3a, BC029214, Epm2a, Naip2, Slc19a1, Hook2, Atpaf2, Kcnab1, Gpaa1, Gm21982, Anxa4, Metap1d, Metap1d, Tex22, Tmem123, Tmem123, Frem1, Prrc2b, Stx16, Pkdcc, Ssrp1, Apoc2                                                                                                                                                      |
| shortened 3'UTR                             | Maged2, Gm14012, Chmp3, Surf1, Gm7120, Irf7, Gm12973, Idh3b, Lca5, Rgs11, Nlrp4e, Flii, Trim68, Plscr2, Vmn2r19, Klhl25, Zswim2, Lrwd1, Gm21982, Ppp1r12b, Serinc5, Nup35, Gm10125, Gm17359, Ppp1r12b, Myom2                                                                                                                                                                                                                                                                                                                                                                                                                                                                                                                                                                                                                                                                                                                                                                        |
| non altered 3'UTR                           | Htt, Stard8, Zfp619, Xkr7, Pglyrp4, Tubal3, Elp5, Slfn5, Kazald1, Nxn12, Stag3, Tspan8, Prep, Psmb8, Ifi27, Gm13794, Supt20, Serp2, Tanc1, Wdr78, lgf2, Dennd1a, Esrrb, 9130204L05Rik, Zscan30, 1700021L23Rik, Plod1, Prodh, Ccdc28a, Zcchc8, 4930443O20Rik, Itfg2, Tex101, Fam186a, Clp1, Mmadhc, 1110004E09Rik, Ptk2b, Nadsyn1, 1700026J12Rik, 4930444M15Rik, Hbb-bs, Racgap1, Blzf1, 1700057G04Rik, Gmpr, Lrrd1, Lztr1, Mtrf1, Soat2, Stoml1, Sun1, Tsr3, Wdr67, Zbtb42, Ap4m1, Usp25, Nbn, Tmem8, Prkaa1, Hhip12, Phf23, Klf2, Pcgf3, Rnasel, Phyhip, Tprn, Cyp27a1, Sun1, Epb4.111, P4ha3, Nmrk1, Mecr, Pik3cd, Unc45b, Fas, Slc39a12, Akap9, Adarb1, A530072M11Rik, Rasgrf1, Hapln1, Flnb, Btrc, Lhfpl2, Rasgrf1, Glis1, Dtna, Gm13490, Cops3, Cwc22, Dennd6b, Hap1, Hsp90aa1, Inpp1, Rfc1, Cyb5r2, Cyb5r2, Rnf219, Cers5, Rgcc, Chd11, Cul5, Gtpbp10, Rbm48, Bcl3, Vangl2, Paqr3, Ptprf, Pdxk, Fam105b, Serac1, Tdrd5, Veph1, Sox6, Fndc1, Rftn1, Hhat, Hdac9, Gabbr2, Maml3 |

**Differential transcripts with altered APA sites in F3 ATZ-derived testis**

| <b>Gene</b>          | <b>strand</b> | <b>Coordinates</b>       |
|----------------------|---------------|--------------------------|
| <i>Spin2-ps2</i>     | -             | chrX:71922607-71923384   |
| <i>Gm11499</i>       | -             | chr11:91990925-91991246  |
| <i>Gm6177</i>        | +             | chr1:162823251-162823715 |
| <i>Mid1</i>          | +             | chrX:166427518-166428501 |
| <i>Mpdz</i>          | -             | chr4:80925242-80925673   |
| <i>Spin2-ps4</i>     | -             | chrX:72135002-72135772   |
| <i>Spin2-ps3</i>     | +             | chrX:72050138-72050899   |
| <i>Spin2-ps4</i>     | -             | chrX:72135002-72135763   |
| <i>Htatsf1</i>       | +             | chrX:54310068-54310383   |
| <i>Mid1</i>          | +             | chrX:166427579-166428727 |
| <i>Spin2-ps3</i>     | +             | chrX:72050129-72050899   |
| <i>Gm2500</i>        | -             | chr4:42336528-42337018   |
| <i>Gm9969</i>        | +             | chr4:42681536-42682026   |
| <i>Htatsf1</i>       | +             | chrX:54310068-54310381   |
| <i>Slfn5</i>         | +             | chr11:82774402-82776443  |
| <i>4933404K08Rik</i> | +             | chr13:23373238-23374136  |
| <i>Rpl21-ps8</i>     | -             | chr18:82692936-82693413  |
| <i>Cwc22</i>         | -             | chr2:77754484-77755220   |
| <i>Gm5687</i>        | +             | chr18:13056936-13057575  |
| <i>Cd68</i>          | -             | chr11:69477715-69478006  |
| <i>1700045I11Rik</i> | +             | chr4:42041568-42042058   |

## Differential transcripts with altered APA sites in F3 ATZ-derived liver

| Gene                 | strand | Coordinates              |
|----------------------|--------|--------------------------|
| <i>Gm12651</i>       | -      | chr4:93570715-93571161   |
| <i>Gm14414</i>       | +      | chr2:177244980-177245552 |
| <i>Gm7887</i>        | -      | chr6:48474553-48474973   |
| <i>Gm13701</i>       | -      | chr2:80817995-80818295   |
| <i>Rps8-ps2</i>      | -      | chr2:175804078-175804765 |
| <i>Pop4</i>          | -      | chr7:39047839-39048328   |
| <i>4632419I22Rik</i> | +      | chr11:86020455-86024183  |
| <i>Gm14438</i>       | +      | chr2:175096057-175096680 |
| <i>Htatsf1</i>       | +      | chrX:54310068-54310383   |
| <i>I830012O16Rik</i> | +      | chr19:34685921-34687891  |
| <i>Rps8-ps2</i>      | -      | chr2:175804115-175804738 |
| <i>Htatsf1</i>       | +      | chrX:54310068-54310381   |
| <i>Ube2j2</i>        | +      | chr4:155331190-155331675 |
| <i>Rpl21-ps8</i>     | -      | chr18:82692936-82693413  |
| <i>Dcaf17</i>        | +      | chr2:70926404-70926701   |
| <i>9430015G10Rik</i> | +      | chr4:155499526-155500328 |
| <i>Gm14438</i>       | +      | chr2:175096030-175096717 |
| <i>Gm14414</i>       | +      | chr2:177244980-177245589 |

## Differential expressed transcripts with altered APA sites in F3 ATZ-derived brain

| <b>Gene</b>    | <b>strand</b> | <b>Coordinates</b>       |
|----------------|---------------|--------------------------|
| <i>Gm14734</i> | -             | chrX:69760043-69760489   |
| <i>Gm11499</i> | -             | chr11:91990925-91991246  |
| <i>Mid1</i>    | +             | chrX:166427518-166428501 |
| <i>Gm10320</i> | -             | chr13:99259303-99259783  |
| <i>Gm5528</i>  | +             | chr1:72050862-72051344   |
| <i>Mid1</i>    | +             | chrX:166427579-166428727 |
| <i>Gm11886</i> | +             | chr4:23349660-23349962   |
| <i>Tcte2</i>   | -             | chr17:13682139-13683705  |
| <i>Gm14702</i> | +             | chrX:66223680-66224125   |
| <i>Gm13468</i> | +             | chr2:47472605-47473049   |
| <i>Gm14414</i> | +             | chr2:177244980-177245589 |

## Functional annotation of altered F3 ATZ-derived testis H3K4me3 peaks

| ID         | Desc                                     | Hyper<br>P-value | Obs<br>Genes | Genes                                                                                                                                                                                                                                                                                                                                                                                                                                                                                                                                                                                                                                                                                                                                                                                                                                                                                                                                                                                                                                                                                                                                                                                                                                                                 |
|------------|------------------------------------------|------------------|--------------|-----------------------------------------------------------------------------------------------------------------------------------------------------------------------------------------------------------------------------------------------------------------------------------------------------------------------------------------------------------------------------------------------------------------------------------------------------------------------------------------------------------------------------------------------------------------------------------------------------------------------------------------------------------------------------------------------------------------------------------------------------------------------------------------------------------------------------------------------------------------------------------------------------------------------------------------------------------------------------------------------------------------------------------------------------------------------------------------------------------------------------------------------------------------------------------------------------------------------------------------------------------------------|
| GO:0031323 | regulation of cellular metabolic process | 2,42E-04         | 188          | 2410141K09Rik,2610044O15Rik8,5730507C01Rik,AW822073,Abra,Adcy1,Ankle2,App,Arfgap3,Arhgap24,Arhgap29,Arhgef19,Arid2,Asap2,Asxl2,Aym1,Bach2,Barhl2,Basp1,Bmpr2,Brd4,Camta1,Cc2d1a,Ccne1,Cdk1,Cdk5rap3,Cebpb,Cep290,Cers6,Cux1,Cux2,D10Bwg1379e,Dicer1,Dmrt1,EU599041,Edn1,Ednra,Eef2k,Efna5,Epc2,Epha2,Ern1,Etv6,Evi5,Ezh2,Fgfr1op,Fnip1,Foxc2,Foxh1,Foxk1,Galr1,Gdi2,Gm10323,Gm13157,Gm13212,Gm13225,Gm13235,Gm6712,Gm7148,Gm9376,Gm9791,Gmeb1,Gtf2e1,Gtf2e2,Gtf2h5,Gzma,Hexim2,Hipk1,Hnrnpk,lars,lkzf5,Il2,Il21,Ino80c,Jarid2,Jmjd1c,Klf1,Klf13,Klf2,Lamtor1,Leo1,Lhx4,Lmo1,Lpin1,Lrrtm3,Lzts1,Maf,Magi3,Map2k6,Map3k7,Mapkbp1,Med10,Mkl2,Mrpl12,Mtif3,Mtnr1a,Nfatc2ip,Nfe2l3,Nfya,Nkd2,Nr3c2,Pfdn5,Pgam5,Phf2,Phf1,Pif1,Ppp1r3b,Ppp4r2,Prex2,Prg4,Ptpn3,Rad21,Rad23b,Ramp3,Rapgef3,Rbm26,Rbpms,Rfx8,Rgma,Rgmb,Rnf4,Rpl38,Runx1,Rxra,Sall3,Sap30l,Shox2,Siah2,Sipa1l2,Smarmarcal1,Smc3,Sod1,Sox14,Sox18,Sox6,Sp5,Spata24,Spdya,Sprtn,Spry1,Srsf4,Srsf7,Taf12,Tbc1d15,Tcf15,Tgfb3,Tgif1,Tiam1,Tnfsf8,Tnks,Tollip,Tram1,Trim24,Trim27,Tsc22d2,Tshz1,Tshz3,Uri1,Usp2,Wapal,Wnt11,Ylpm1,Ywhaq,Zbtb44,Zcchc9,Zfat,Zfhx3,Zfp191,Zfp369,Zfp36l1,Zfp462,Zfp516,Zfp521,Zfp534,Zfp536,Zfp64,Zfp640,Zfp71rs1,Zfp715,Zfp85rs1,Zfp930,Zfp932,Zfp960,Zfp97,Zfpm2,Zfyve28,Zhx2,Zmym2 |

## Functional annotation of altered F3 ATZ-derived testis H3K4me3 peaks

|            |                                                                 |          |     |                                                                                                                                                                                                                                                                                                                                                                                                                                                                                                                                                                                                                                                                                                                                                                                                                                                                                                                                                                                                                               |
|------------|-----------------------------------------------------------------|----------|-----|-------------------------------------------------------------------------------------------------------------------------------------------------------------------------------------------------------------------------------------------------------------------------------------------------------------------------------------------------------------------------------------------------------------------------------------------------------------------------------------------------------------------------------------------------------------------------------------------------------------------------------------------------------------------------------------------------------------------------------------------------------------------------------------------------------------------------------------------------------------------------------------------------------------------------------------------------------------------------------------------------------------------------------|
| GO:0006355 | regulation of transcription, DNA-dependent                      | 2,43E-04 | 133 | 2410141K09Rik,2610044015Rik,5730507C01Rik, AW822073, Abra, App, Arid2, Asxl2, Aym1, Bach2, Barhl2, Basp1, Bmpr2, Brd4, Camta1, Cc2d1a, Cdk5rap3, Cebpb, Cep290, Cers6, Cux1, Cux2, Dicer1, Dmrt1, EU599041, Edn1, Epc2, Ern1, Etv6, Ezh2, Fnip1, Foxc2, Foxh1, Foxk1, Gm10323, Gm13157, Gm13212, Gm13225, Gm13235, Gm6712, Gm7148, Gm9376, Gm9791, Gmeh1, Gtf2e1, Gtf2e2, Gtf2h5, Hexim2, Hipk1, Hnrnpk, Ikzf5, Il2, Ino80c, Jarid2, Jmjd1c, Klf1, Klf13, Klf2, Leo1, Lhx4, Lmo1, Lpin1, Maf, Map2k6, Map3k7, Mapkbp1, Med10, Mkl2, Mrpl12, Nfatc2ip, Nfe2l3, Nfya, Nr3c2, Pfdn5, Phf2, Phf1, Rad21, Ramp3, Rbpms, Rfx8, Rgma, Rgmb, Rnf4, Runx1, Rxra, Sall3, Sap30l, Shox2, Smarcal1, Sox14, Sox18, Sox6, Sp5, Spata24, Taf12, Tcf15, Tgfbr3, Tgif1, Tnfsf8, Tnks, Tram1, Trim24, Trim27, Tsc22d2, Tshz1, Tshz3, Uri1, Usp2, Wnt11, Ylpm1, Ywhaq, Zbtb44, Zfat, Zfhx3, Zfp191, Zfp369, Zfp462, Zfp516, Zfp521, Zfp534, Zfp536, Zfp64, Zfp640, Zfp71rs1, Zfp715, Zfp85rs1, Zfp930, Zfp932, Zfp960, Zfp97, Zfpm2, Zhx2, Zmym2 |
| GO:0048387 | negative regulation of retinoic acid receptor signaling pathway | 7,31E-04 | 3   | Ezh2, Tgif1, Zfp536                                                                                                                                                                                                                                                                                                                                                                                                                                                                                                                                                                                                                                                                                                                                                                                                                                                                                                                                                                                                           |
| GO:0032318 | regulation of Ras GTPase activity                               | 9,29E-04 | 16  | Arfgap3, Arhgap24, Arhgef19, Asap2, Efna5, Epha2, Evi5, Ezh2, Gdi2, Prex2, Rapgef3, Sod1, Spry1, Tbc1d15, Tiam1, Wnt11                                                                                                                                                                                                                                                                                                                                                                                                                                                                                                                                                                                                                                                                                                                                                                                                                                                                                                        |
| GO:0048318 | axial mesoderm development                                      | 2,84E-03 | 3   | Epha2, Foxh1, Rpl38                                                                                                                                                                                                                                                                                                                                                                                                                                                                                                                                                                                                                                                                                                                                                                                                                                                                                                                                                                                                           |
| GO:0060119 | inner ear receptor cell development                             | 3,19E-03 | 5   | Cecr2, Dicer1, Gabrb3, Gpr98, Sod1                                                                                                                                                                                                                                                                                                                                                                                                                                                                                                                                                                                                                                                                                                                                                                                                                                                                                                                                                                                            |



## Functional annotation of altered F3 ATZ-derived testis H3K4me3 peaks

|            |                                                        |          |     |                                                                                                                                                                                                                                                                                                                                                                                                                                                                                                                                                                                                                                                                   |
|------------|--------------------------------------------------------|----------|-----|-------------------------------------------------------------------------------------------------------------------------------------------------------------------------------------------------------------------------------------------------------------------------------------------------------------------------------------------------------------------------------------------------------------------------------------------------------------------------------------------------------------------------------------------------------------------------------------------------------------------------------------------------------------------|
| GO:0033002 | muscle cell proliferation                              | 3,45E-03 | 4   | <i>Foxc2,Naa35,Rxra,Tgfb3</i>                                                                                                                                                                                                                                                                                                                                                                                                                                                                                                                                                                                                                                     |
| GO:0048385 | regulation of retinoic acid receptor signaling pathway | 3,96E-03 | 3   | <i>Ezh2,Tgif1,Zfp536</i>                                                                                                                                                                                                                                                                                                                                                                                                                                                                                                                                                                                                                                          |
| GO:0048285 | organelle fission                                      | 4,36E-03 | 20  | <i>Anapc4,Ankle2,Cdc6,Cdca2,Cdk1,Cltc,Gimap3,Haus3,Kntc1,Lpin1,Map10,Nsun2,Pogz,Rad21,Sgol1,Smc3,Spc24,Tnks,Vrk1,Wapal</i>                                                                                                                                                                                                                                                                                                                                                                                                                                                                                                                                        |
| GO:0031124 | mRNA 3'-end processing                                 | 4,88E-03 | 5   | <i>App,Cpsf6,Cstf2t,Leo1,Parn</i>                                                                                                                                                                                                                                                                                                                                                                                                                                                                                                                                                                                                                                 |
| GO:0030004 | cellular monovalent inorganic cation homeostasis       | 4,88E-03 | 5   | <i>Cftr,Nr3c2,Rab20,Rab7,Slc26a3</i>                                                                                                                                                                                                                                                                                                                                                                                                                                                                                                                                                                                                                              |
| GO:0032204 | regulation of telomere maintenance                     | 5,31E-03 | 3   | <i>Pif1,Tnks,Ylpm1</i>                                                                                                                                                                                                                                                                                                                                                                                                                                                                                                                                                                                                                                            |
| GO:0001946 | lymphangiogenesis                                      | 5,31E-03 | 3   | <i>Bmpr2,Foxc2,Sox18</i>                                                                                                                                                                                                                                                                                                                                                                                                                                                                                                                                                                                                                                          |
| GO:0034502 | protein localization to chromosome                     | 6,01E-03 | 4   | <i>Cdk1,Rad21,Tnks,Wapal</i>                                                                                                                                                                                                                                                                                                                                                                                                                                                                                                                                                                                                                                      |
| GO:0060491 | regulation of cell projection assembly                 | 6,52E-03 | 7   | <i>Arhgap24,Bbs4,Cdc42ep4,Epha2,Kank1,Myo10,Myo3b</i>                                                                                                                                                                                                                                                                                                                                                                                                                                                                                                                                                                                                             |
| GO:0016070 | RNA metabolic process                                  | 6,81E-03 | 105 | <i>Abra,Alyref2,App,Asxl2,Asz1,Bach2,Barhl2,Bmpr2,Brd4,Camta1,Cc2d1a,Cebpb,Cep290,Cpsf6,Cstf2t,Cux1,Cux2,Dicer1,Dido1,Dmrt1,Epc2,Ern1,Etv6,Ezh2,Fdxacb1,Foxc2,Foxh1,Foxk1,Gmeb1,Gtf2e1,Gtf2e2,Gtf2h5,Hexim2,Hipk1,Hnrnpk,lars,lkzf5,Ino80c,Jarid2,Jmjd1c,Klf1,Klf13,Klf2,Lcmt2,Leo1,Lhx4,Lpin1,Maf,Map2k6,Map3k7,Med10,Mkl2,Mrpl12,Nfe2l3,Nfya,Nr3c2,Nsun2,Parn,Pes1,Phf2,Phf1,Polr3a,Pop4,Ppp4r2,Rbm26,Rbpms,Rfx8,Rnf4,Runx1,Rxra,Sall3,Sap30l,Sf3a1,Snrnp40,Sox14,Sox18,Sox6,Sp5,Spata24,Srsf4,Srsf7,Taf12,Tgif1,Tram1,Trim24,Trim27,Tshz1,Tshz3,Uri1,Utp23,Wdr83,Ylpm1,Zbtb44,Zfat,Zfhx3,Zfp191,Zfp369,Zfp36l1,Zfp516,Zfp521,Zfp536,Zfp64,Zfpm2,Zhx2,Zmym2</i> |
| GO:0036303 | lymph vessel morphogenesis                             | 6,90E-03 | 3   | <i>Bmpr2,Foxc2,Sox18</i>                                                                                                                                                                                                                                                                                                                                                                                                                                                                                                                                                                                                                                          |
| GO:0060113 | inner ear receptor cell differentiation                | 7,52E-03 | 6   | <i>Cecr2,Cux1,Dicer1,Gabrb3,Gpr98,Sod1</i>                                                                                                                                                                                                                                                                                                                                                                                                                                                                                                                                                                                                                        |
| GO:0050880 | regulation of blood vessel size                        | 7,69E-03 | 7   | <i>Cftr,Edn1,Ednra,Foxc2,Kcnj8,Sod1,Tgfb3</i>                                                                                                                                                                                                                                                                                                                                                                                                                                                                                                                                                                                                                     |
| GO:0006378 | mRNA polyadenylation                                   | 8,27E-03 | 4   | <i>App,Cpsf6,Cstf2t,Leo1</i>                                                                                                                                                                                                                                                                                                                                                                                                                                                                                                                                                                                                                                      |

## Functional annotation of altered F3 ATZ-derived testis H3K4me3 peaks

|            |                                  |          |     |                                                                                                                                                                                                                                                                                                                                                                                                                                                                                                                                                                                                                                                                                                                                                                                       |
|------------|----------------------------------|----------|-----|---------------------------------------------------------------------------------------------------------------------------------------------------------------------------------------------------------------------------------------------------------------------------------------------------------------------------------------------------------------------------------------------------------------------------------------------------------------------------------------------------------------------------------------------------------------------------------------------------------------------------------------------------------------------------------------------------------------------------------------------------------------------------------------|
| GO:0035150 | regulation of tube size          | 8,33E-03 | 7   | <i>Cftr,Edn1,Ednra,Foxc2,Kcnj8,Sod1,Tgfr3</i>                                                                                                                                                                                                                                                                                                                                                                                                                                                                                                                                                                                                                                                                                                                                         |
| GO:0007067 | mitosis                          | 8,67E-03 | 18  | <i>Anapc4,Ankle2,Cdc6,Cdca2,Cdk1,Cltc,Haus3,Kntc1,Map10,Nsun2,Pogz,Rad21,Sgol1,Smc3,Spc24,Tnks,Vrk1,Wapal</i>                                                                                                                                                                                                                                                                                                                                                                                                                                                                                                                                                                                                                                                                         |
| GO:0090382 | phagosome maturation             | 8,74E-03 | 3   | <i>Rab20,Rab31,Rab7</i>                                                                                                                                                                                                                                                                                                                                                                                                                                                                                                                                                                                                                                                                                                                                                               |
| GO:0006662 | glycerol ether metabolic process | 8,74E-03 | 3   | <i>Pdia4,Pdia5,Txndc2</i>                                                                                                                                                                                                                                                                                                                                                                                                                                                                                                                                                                                                                                                                                                                                                             |
| GO:0043631 | RNA polyadenylation              | 9,58E-03 | 4   | <i>App,Cpsf6,Cstf2t,Leo1</i>                                                                                                                                                                                                                                                                                                                                                                                                                                                                                                                                                                                                                                                                                                                                                          |
| GO:0090304 | nucleic acid metabolic process   | 1,10E-02 | 124 | <i>Abra,Alyref2,Apaf1,App,Asxl2,Asz1,Bach2,Barhl2,Bmpr2,Brd4,Camta1,Cc2d1a,Ccne1,Cdc6,Cdk1,Cebpb,Cep290,Cpsf6,Cstf2t,Cux1,Cux2,Dicer1,Dido1,Dmrt1,Dnase2a,Endou,Epc2,Ern1,Etv6,Ezh2,Fdxac1,Foxc2,Foxh1,Foxk1,Gmeb1,Gtf2e1,Gtf2e2,Gtf2h5,Haus3,Hexim2,Hipk1,Hist1h2al,Hnrnpk,lars,lkzf5,Ino80c,Jarid2,Jmjd1c,Klf1,Klf13,Klf2,Lcmt2,Leo1,Lhx4,Lpin1,Maf,Map2k6,Map3k7,Med10,Mkl2,Mrpl12,Nfe2l3,Nfya,Nr3c2,Nsun2,Orc5,Parn,Pes1,Phf2,Phtf1,Pif1,Polr3a,Pop4,Ppp4r2,Rad21,Rad23b,Rbm26,Rbpms,Rdm1,Rfx8,Rnf4,Runx1,Rxra,Sall3,Sap30l,Sf3a1,Smarcal1,Smc3,Snrnp40,Sox14,Sox18,Sox6,Sp5,Spata24,Sprtn,Srsf4,Srsf7,Taf12,Tgif1,Top3a,Tram1,Trim24,Trim27,Trip13,Tshz1,Tshz3,Uri1,Utp23,Wdr83,Wrn,Ylpm1,Zbtb44,Zfat,Zfx3,Zfp191,Zfp369,Zfp36l1,Zfp516,Zfp521,Zfp536,Zfp64,Zfpm2,Zhx2,Zmym2</i> |
| GO:0051453 | regulation of intracellular pH   | 1,10E-02 | 4   | <i>Cftr,Rab20,Rab7,Slc26a3</i>                                                                                                                                                                                                                                                                                                                                                                                                                                                                                                                                                                                                                                                                                                                                                        |
| GO:0030641 | regulation of cellular pH        | 1,26E-02 | 4   | <i>Cftr,Rab20,Rab7,Slc26a3</i>                                                                                                                                                                                                                                                                                                                                                                                                                                                                                                                                                                                                                                                                                                                                                        |
| GO:0051301 | cell division                    | 1,36E-02 | 23  | <i>Anapc4,Ankle2,Bbs4,Ccne1,Cdc6,Cdc7,Cdca2,Cdk1,Dicer1,Evi5,Haus3,Kntc1,Map10,Nsun2,Pogz,Rab11fip3,Rad21,Sgol1,Smc3,Spc24,Tnks,Vrk1,Wapal</i>                                                                                                                                                                                                                                                                                                                                                                                                                                                                                                                                                                                                                                        |

## Functional annotation of altered F3 ATZ-derived testis H3K4me3 peaks

|            |                                                                          |          |    |                                                                                                                                                                                                                                                                                                                                                                                                                                                                                                                                                                                                                                                |
|------------|--------------------------------------------------------------------------|----------|----|------------------------------------------------------------------------------------------------------------------------------------------------------------------------------------------------------------------------------------------------------------------------------------------------------------------------------------------------------------------------------------------------------------------------------------------------------------------------------------------------------------------------------------------------------------------------------------------------------------------------------------------------|
| GO:0001895 | retina homeostasis                                                       | 1,43E-02 | 4  | <i>Abca4, Bbs4, Gpr98, Sod1</i>                                                                                                                                                                                                                                                                                                                                                                                                                                                                                                                                                                                                                |
| GO:0007205 | protein kinase C-activating G-protein coupled receptor signaling pathway | 1,43E-02 | 4  | <i>Agk, Dgkh, Edn1, Il2</i>                                                                                                                                                                                                                                                                                                                                                                                                                                                                                                                                                                                                                    |
| GO:0055010 | ventricular cardiac muscle tissue morphogenesis                          | 1,65E-02 | 5  | <i>Foxc2, Foxh1, Rxra, Tgfbr3, Zfpm2</i>                                                                                                                                                                                                                                                                                                                                                                                                                                                                                                                                                                                                       |
| GO:0055067 | monovalent inorganic cation homeostasis                                  | 1,74E-02 | 6  | <i>Cftr, Edn1, Nr3c2, Rab20, Rab7, Slc26a3</i>                                                                                                                                                                                                                                                                                                                                                                                                                                                                                                                                                                                                 |
| GO:0015991 | ATP hydrolysis coupled proton transport                                  | 1,82E-02 | 4  | <i>Atp6v0e, Atp6v0e2, Atp6v1e1, Atp6v1g3</i>                                                                                                                                                                                                                                                                                                                                                                                                                                                                                                                                                                                                   |
| GO:1902115 | regulation of organelle assembly                                         | 1,82E-02 | 4  | <i>Bbs4, Edn1, Myh4, Rnf4</i>                                                                                                                                                                                                                                                                                                                                                                                                                                                                                                                                                                                                                  |
| GO:0045931 | positive regulation of mitotic cell cycle                                | 1,82E-02 | 4  | <i>App, Brd4, Cdk1, Usp2</i>                                                                                                                                                                                                                                                                                                                                                                                                                                                                                                                                                                                                                   |
| GO:0007009 | plasma membrane organization                                             | 1,88E-02 | 8  | <i>Ano6, Col5a1, Crb1, Nkd2, Pacsin2, Rab31, Ramp3, Sod1</i>                                                                                                                                                                                                                                                                                                                                                                                                                                                                                                                                                                                   |
| GO:0006200 | ATP catabolic process                                                    | 1,90E-02 | 10 | <i>Abca4, Abca6, Abca9, Abcc4, Atp5j, Cftr, Dnahc7b, Mdn1, Vwa8, Wrn</i>                                                                                                                                                                                                                                                                                                                                                                                                                                                                                                                                                                       |
| GO:0006996 | organelle organization                                                   | 2,00E-02 | 84 | <i>4933400A11Rik, Anapc4, Ankle2, Arhgef10l, Arid2, Arl6, Bbs4, Brd4, Cdc6, Cdca2, Cdk1, Cep290, Cltc, Coro2b, Crocc, Dctn6, Dicer1, Dtnbp1, Epc2, Ezh2, Fam101b, Fam109a, Fat1, Fcho1, Fgfr1op, Gimap3, Golph3l, Gzma, Haus3, Hist1h2al, Jarid2, Jmjd1c, Kansl1, Klf1, Kntc1, Lamtor1, Leo1, Lpin1, Map10, Map3k7, Mapt, Mrpl12, Msrb2, Myh4, Nkd2, Nsun2, Nup153, Pes1, Pfn2, Phactr1, Phf2, Pif1, Pogz, Ptpn1, Rab20, Rab31, Rab7, Rad21, Rad23b, Rnf40, Rpl38, Rpsaps10, Sclt1, Sgol1, Sh2b2, Shroom1, Shroom3, Slc25a4, Smarcal1, Smc3, Sod1, Spc24, Spry1, Taf12, Tmed5, Tnks, Tomm34, Tram1, Trip13, Ttl6, Vrk1, Wapal, Wrn, Zfp462</i> |

## Functional annotation of altered F3 ATZ-derived testis H3K4me3 peaks

|            |                                           |          |     |                                                                                                                                                                                                                                                                                                                                                                                                                                                                                                                                                                                                                                                                                                                                                                                                                                                                                                                                                                                                                                                                                                                                                     |
|------------|-------------------------------------------|----------|-----|-----------------------------------------------------------------------------------------------------------------------------------------------------------------------------------------------------------------------------------------------------------------------------------------------------------------------------------------------------------------------------------------------------------------------------------------------------------------------------------------------------------------------------------------------------------------------------------------------------------------------------------------------------------------------------------------------------------------------------------------------------------------------------------------------------------------------------------------------------------------------------------------------------------------------------------------------------------------------------------------------------------------------------------------------------------------------------------------------------------------------------------------------------|
| GO:1901360 | organic cyclic compound metabolic process | 2,08E-02 | 157 | <p><i>Abca4, Abca6, Abca9, Abcc4, Abra, Adcy1, Adss, Alad, Alyref2, Amd2, Apaf1, App, Asxl2, Asz1, Atp5j, Bach2, Barhl2, Bmpr2, Brd4, Camta1, Cc2d1a, Ccne1, Cdc6, Cdk1, Cebpb, Cep290, Cftr, Cmah, Cpsf6, Cstf2t, Cux1, Cux2, Cyp51, Dctd, Dicer1, Dido1, Dio3, Dmrt1, Dnahc7b, Dnase2a, Endou, Epc2, Ern1, Etv6, Ezh2, Fdxacb1, Foxc2, Foxh1, Foxk1, Gmeb1, Gtf2e1, Gtf2e2, Gtf2h5, Haus3, Hexim2, Hipk1, Hist1h2al, Hnrnpk, Iars, Ikzf5, Ino80c, Jarid2, Jmjd1c, Klf1, Klf13, Klf2, Lcmt2, Ldhb, Leo1, Lhx4, Lpin1, Maf, Map2k6, Map3k7, Mdn1, Med10, Mkl2, Mmadhc, Mme, Mrpl12, Nfe2l3, Nfya, Nmnat3, Nr3c2, Nsun2, Nuggc, Oard1, Orc5, Parn, Pde4a, Pes1, Phf2, Phf1, Pif1, Polr3a, Pop4, Ppcdc, Ppp4r2, Rab7, Rad21, Rad23b, Rbm26, Rbpms, Rdm1, Rfx8, Rnf4, Runx1, Rxra, Sall3, Sap30l, Sf3a1, Smarcal1, Smc3, Snrnp40, Sox14, Sox18, Sox6, Sp5, Spata24, Sprtn, Srd1, Srp54b, Srp54c, Srsf4, Srsf7, Taf12, Tgif1, Tgm3, Top3a, Tph2, Tram1, Trim24, Trim27, Trip13, Tshz1, Tshz3, Uck2, Uck2, Uri1, Utp23, Vwa8, Wdr83, Wrn, Ylpm1, Zbtb44, Zfat, Zfhx3, Zfp191, Zfp369, Zfp36l1, Zfp516, Zfp521, Zfp536, Zfp64, Zfpm2, Zhx2, Zmym2</i></p> |
|------------|-------------------------------------------|----------|-----|-----------------------------------------------------------------------------------------------------------------------------------------------------------------------------------------------------------------------------------------------------------------------------------------------------------------------------------------------------------------------------------------------------------------------------------------------------------------------------------------------------------------------------------------------------------------------------------------------------------------------------------------------------------------------------------------------------------------------------------------------------------------------------------------------------------------------------------------------------------------------------------------------------------------------------------------------------------------------------------------------------------------------------------------------------------------------------------------------------------------------------------------------------|

## Functional annotation of altered F3 ATZ-derived testis H3K4me3 peaks

|            |                                                       |          |    |                                                                                                                                        |
|------------|-------------------------------------------------------|----------|----|----------------------------------------------------------------------------------------------------------------------------------------|
| GO:0031623 | receptor internalization                              | 2,26E-02 | 4  | <i>Cltc,Cxcr7,Rab31,Ramp3</i>                                                                                                          |
| GO:0009169 | purine ribonucleoside monophosphate catabolic process | 2,28E-02 | 10 | <i>Abca4,Abca6,Abca9,Abcc4,Atp5j,Cftr,Dnahc7b,Mdn1,Vwa8,Wrn</i>                                                                        |
| GO:0031123 | RNA 3'-end processing                                 | 2,32E-02 | 5  | <i>App,Cpsf6,Cstf2t,Leo1,Parn</i>                                                                                                      |
| GO:0009128 | purine nucleoside monophosphate catabolic process     | 2,38E-02 | 10 | <i>Abca4,Abca6,Abca9,Abcc4,Atp5j,Cftr,Dnahc7b,Mdn1,Vwa8,Wrn</i>                                                                        |
| GO:0048469 | cell maturation                                       | 2,39E-02 | 9  | <i>App,Cftr,Ii21,Klf1,Klf2,Sc1t1,Slc26a3,Sox18,Trip13</i>                                                                              |
| GO:0008088 | axon cargo transport                                  | 2,50E-02 | 4  | <i>App,Dtnbp1,Mapt,Sod1</i>                                                                                                            |
| GO:0009125 | nucleoside monophosphate catabolic process            | 2,59E-02 | 10 | <i>Abca4,Abca6,Abca9,Abcc4,Atp5j,Cftr,Dnahc7b,Mdn1,Vwa8,Wrn</i>                                                                        |
| GO:0006898 | receptor-mediated endocytosis                         | 2,65E-02 | 6  | <i>Cltc,Cxcr7,Fcho1,Pacsin2,Rab31,Ramp3</i>                                                                                            |
| GO:0006885 | regulation of pH                                      | 2,72E-02 | 5  | <i>Cftr,Edn1,Rab20,Rab7,Slc26a3</i>                                                                                                    |
| GO:0044802 | single-organism membrane organization                 | 3,47E-02 | 18 | <i>Abca4,Ankle2,Ano6,Arl6,Col5a1,Crb1,Fcho1,Nkd2,Pacsin2,Rab20,Rab31,Rab7,Ramp3,Sc1t1,Sod1,Spam1,Srp54b,Srp54c</i>                     |
| GO:0007017 | microtubule-based process                             | 3,51E-02 | 21 | <i>App,Bbs4,Ccdc39,Cltc,Crocc,Dicer1,Dnahc14,Dnahc7b,Dtnbp1,Fgfr1op,Haus3,Ift43,Kif21b,Kif5c,Map10,Mapt,Sgol1,Smc3,Sod1,Spry1,Tll6</i> |

## Functional annotation of altered F3 ATZ-derived testis H3K4me3 peaks

| ID         | Desc                                           | HyperP   | Obs Genes | Genes                                                                                                                     |
|------------|------------------------------------------------|----------|-----------|---------------------------------------------------------------------------------------------------------------------------|
| GO:0009161 | ribonucleoside monophosphate metabolic process | 3,67E-02 | 13        | <i>Abca4,Abca6,Abca9,Abcc4,Adss,Atp5j,Cftr,Dnahc7b,Mdn1,Uck2,Uck2,Vwa8,Wrn</i>                                            |
| GO:0000278 | mitotic cell cycle                             | 3,82E-02 | 20        | <i>Anapc4,Ankle2,Cdc6,Cdca2,Cdk1,Cltc,Haus3,Kntc1,Map10,Nsun2,Pogz,Rad21,Sgol1,Smc3,Spc24,Spdya,Spry1,Tnks,Vrk1,Wapal</i> |
| GO:0007140 | male meiosis                                   | 3,96E-02 | 4         | <i>Asz1,Mei1,Spdya,Trip13</i>                                                                                             |
| GO:0051225 | spindle assembly                               | 3,96E-02 | 4         | <i>Cltc,Dicer1,Haus3,Map10</i>                                                                                            |
| GO:0022411 | cellular component disassembly                 | 3,96E-02 | 7         | <i>Apaf1,Arid2,Gzma,Mtif3,Mtrf1,Noxo1,Vrk1</i>                                                                            |
| GO:0006873 | cellular ion homeostasis                       | 3,99E-02 | 16        | <i>App,Cftr,Edn1,Galr1,Hrh4,Ii2,Nr3c2,Nucb2,Rab20,Rab7,Scara5,Slc24a3,Slc26a3,Slc34a2,Sod1,Trpm1</i>                      |
| GO:0006821 | chloride transport                             | 4,51E-02 | 6         | <i>Ano6,Cftr,Clcn3,Clc6,Gabrb3,Slc26a3</i>                                                                                |
| GO:0009123 | nucleoside monophosphate metabolic process     | 4,54E-02 | 13        | <i>Abca4,Abca6,Abca9,Abcc4,Adss,Atp5j,Cftr,Dnahc7b,Mdn1,Uck2,Uck2,Vwa8,Wrn</i>                                            |
| GO:0006457 | protein folding                                | 4,69E-02 | 9         | <i>Dnajb13,Dnajb4,Fkbp14,Grpel2,Pdia5,Pfdn5,Qsox1,Txndc2,Uri1</i>                                                         |
| GO:0033044 | regulation of chromosome organization          | 4,69E-02 | 8         | <i>Asxl2,Jarid2,Lpin1,Pif1,Rnf4,Tnks,Wapal,Ylpm1</i>                                                                      |

## Functional annotation of altered F1 ATZ-derived testis H3K4me3 peaks

| ID         | Desc                                                                                      | HyperP   | Obs Genes | Genes                                                                                                       |
|------------|-------------------------------------------------------------------------------------------|----------|-----------|-------------------------------------------------------------------------------------------------------------|
| GO:0072132 | mesenchyme morphogenesis                                                                  | 3,48E-05 | 5         | <i>Hey1, Isl1, Osr1, Sox9, Twist1</i>                                                                       |
| GO:0048863 | stem cell differentiation                                                                 | 3,74E-05 | 15        | <i>Cyp26a1, Eomes, Hey1, Isl1, Jarid2, Med10, Msi2, Nanos2, Nog, Osr1, Pou5f1, Sox2, Sox9, Twist1, Zhx2</i> |
| GO:0048864 | stem cell development                                                                     | 4,26E-05 | 13        | <i>Cyp26a1, Eomes, Hey1, Isl1, Med10, Msi2, Nanos2, Nog, Pou5f1, Sox2, Sox9, Twist1, Zhx2</i>               |
| GO:0001706 | endoderm formation                                                                        | 9,93E-05 | 5         | <i>Eomes, Lhx1, Nog, Pou5f1, Sox2</i>                                                                       |
| GO:0001714 | endodermal cell fate specification                                                        | 1,06E-04 | 3         | <i>Eomes, Pou5f1, Sox2</i>                                                                                  |
| GO:0002495 | antigen processing and presentation of peptide antigen via MHC class II                   | 1,92E-04 | 4         | <i>H2-Aa, H2-Ab1, H2-DMb1, March1</i>                                                                       |
| GO:0003203 | endocardial cushion morphogenesis                                                         | 2,43E-04 | 4         | <i>Hey1, Isl1, Sox9, Twist1</i>                                                                             |
| GO:2000543 | positive regulation of gastrulation                                                       | 2,89E-04 | 3         | <i>Lhx1, Osr1, Otx2</i>                                                                                     |
| GO:0002504 | antigen processing and presentation of peptide or polysaccharide antigen via MHC class II | 3,04E-04 | 4         | <i>H2-Aa, H2-Ab1, H2-DMb1, March1</i>                                                                       |
| GO:0072028 | nephron morphogenesis                                                                     | 3,09E-04 | 5         | <i>Hey1, Irx1, Lhx1, Osr1, Sox9</i>                                                                         |
| GO:0007492 | endoderm development                                                                      | 4,56E-04 | 6         | <i>Eomes, Lhx1, Nog, Otx2, Pou5f1, Sox2</i>                                                                 |
| GO:0019827 | stem cell maintenance                                                                     | 5,27E-04 | 8         | <i>Eomes, Med10, Nanos2, Nog, Pou5f1, Sox2, Sox9, Zhx2</i>                                                  |

## Functional annotation of altered F1 ATZ-derived testis H3K4me3 peaks

| ID         | Desc                                                             | HyperP   | Obs Genes | Genes                                                                                                                                          |
|------------|------------------------------------------------------------------|----------|-----------|------------------------------------------------------------------------------------------------------------------------------------------------|
| GO:0033993 | response to lipid                                                | 5,31E-04 | 21        | <i>Abl2, Aicda, Alpl, Cftr, Cnr1, Cyp26a1, Il15, Isl1, Lbp, Lox, Mapk3, Nr3c2, Osr1, Pou5f1, Ptgfr, Rbp1, Slc34a2, Sox2, Sox9, Tat, Tgfbr2</i> |
| GO:0002478 | antigen processing and presentation of exogenous peptide antigen | 7,77E-04 | 4         | <i>H2-Aa, H2-Ab1, H2-DMb1, H2-Q2</i>                                                                                                           |
| GO:0072006 | nephron development                                              | 9,58E-04 | 7         | <i>Acta2, Hey1, Irx1, Lhx1, Magi2, Osr1, Sox9</i>                                                                                              |
| GO:0043583 | ear development                                                  | 1,03E-03 | 11        | <i>Chd7, Grhl3, H2-DMb1, H2-Q2, Maf, Nog, Osr1, Otx2, Rpl38, Sox2, Sox9</i>                                                                    |
| GO:0072073 | kidney epithelium development                                    | 1,10E-03 | 6         | <i>Hey1, Irx1, Lhx1, Magi2, Osr1, Sox9</i>                                                                                                     |
| GO:0045621 | positive regulation of lymphocyte differentiation                | 1,29E-03 | 6         | <i>Cd83, H2-Aa, H2-DMb1, Ikzf1, Il15, Tgfbr2</i>                                                                                               |
| GO:0001708 | cell fate specification                                          | 1,29E-03 | 6         | <i>Eomes, Isl1, Otx2, Pou5f1, Sox2, Sox9</i>                                                                                                   |
| GO:0042471 | ear morphogenesis                                                | 1,35E-03 | 8         | <i>Chd7, Grhl3, Nog, Osr1, Otx2, Rpl38, Sox2, Sox9</i>                                                                                         |
| GO:0001711 | endodermal cell fate commitment                                  | 1,38E-03 | 3         | <i>Eomes, Pou5f1, Sox2</i>                                                                                                                     |



## Functional annotation of altered F1 ATZ-derived testis H3K4me3 peaks

| ID         | Desc                                                                              | HyperP   | Obs Genes | Genes                                                      |
|------------|-----------------------------------------------------------------------------------|----------|-----------|------------------------------------------------------------|
| GO:0072009 | nephron epithelium development                                                    | 1,41E-03 | 5         | <i>Hey1,Irx1,Lhx1,Osr1,Sox9</i>                            |
| GO:0003197 | endocardial cushion development                                                   | 1,42E-03 | 4         | <i>Hey1,Isl1,Sox9,Twist1</i>                               |
| GO:0050870 | positive regulation of T cell activation                                          | 1,42E-03 | 8         | <i>Cd83,Coro1a,H2-Aa,H2-Ab1,H2-DMb1,Ikzf1,Ill15,Tgfbr2</i> |
| GO:0019884 | antigen processing and presentation of exogenous antigen                          | 1,62E-03 | 4         | <i>H2-Aa,H2-Ab1,H2-DMb1,H2-Q2</i>                          |
| GO:0060009 | Sertoli cell development                                                          | 1,73E-03 | 3         | <i>Fndc3a,Nup210l,Sox9</i>                                 |
| GO:0072087 | renal vesicle development                                                         | 1,73E-03 | 3         | <i>Hey1,Lhx1,Osr1</i>                                      |
| GO:0072079 | nephron tubule formation                                                          | 1,73E-03 | 3         | <i>Irx1,Osr1,Sox9</i>                                      |
| GO:0072088 | nephron epithelium morphogenesis                                                  | 1,84E-03 | 4         | <i>Irx1,Lhx1,Osr1,Sox9</i>                                 |
| GO:0060993 | kidney morphogenesis                                                              | 1,87E-03 | 5         | <i>Hey1,Irx1,Lhx1,Osr1,Sox9</i>                            |
| GO:0001649 | osteoblast differentiation                                                        | 2,14E-03 | 6         | <i>Figl1,Hey1,Nog,Sox2, Twist1,Wwox</i>                    |
| GO:0019886 | antigen processing and presentation of exogenous peptide antigen via MHC class II | 2,14E-03 | 3         | <i>H2-Aa,H2-Ab1,H2-DMb1</i>                                |
| GO:0007398 | ectoderm development                                                              | 2,14E-03 | 3         | <i>Grhl3,Lhx1,Pou5f1</i>                                   |
| GO:0035987 | endodermal cell differentiation                                                   | 2,60E-03 | 3         | <i>Eomes,Pou5f1,Sox2</i>                                   |
| GO:0072210 | metanephric nephron development                                                   | 2,95E-03 | 4         | <i>Irx1,Lhx1,Osr1,Sox9</i>                                 |
| GO:0032526 | response to retinoic acid                                                         | 3,15E-03 | 6         | <i>Abi2,Cyp26a1,Osr1,Pou5f1, Sox2,Sox9</i>                 |

## Functional annotation of altered F1 ATZ-derived testis H3K4me3 peaks

| ID         | Desc                                                   | HyperP   | Obs<br>Gene<br>s | Genes                                                                                                                                                                                                                                                                                               |
|------------|--------------------------------------------------------|----------|------------------|-----------------------------------------------------------------------------------------------------------------------------------------------------------------------------------------------------------------------------------------------------------------------------------------------------|
| GO:0071300 | cellular response to retinoic acid                     | 3,28E-03 | 4                | <i>Abl2, Cyp26a1, Osr1, Sox9</i>                                                                                                                                                                                                                                                                    |
| GO:0045582 | positive regulation of T cell differentiation          | 3,60E-03 | 5                | <i>Cd83, H2-Aa, H2-DMb1, Ikzf1, Tgfbr2</i>                                                                                                                                                                                                                                                          |
| GO:0070849 | response to epidermal growth factor stimulus           | 3,69E-03 | 3                | <i>Garem, Mapk3, Sox9</i>                                                                                                                                                                                                                                                                           |
| GO:0045619 | regulation of lymphocyte differentiation               | 3,82E-03 | 7                | <i>Cd83, H2-Aa, H2-DMb1, Ikzf1, Il15, Ndfip1, Tgfbr2</i>                                                                                                                                                                                                                                            |
| GO:0010033 | response to organic substance                          | 4,02E-03 | 43               | <i>Abl2, Aicda, Alpl, Cd83, Cfr, Cnr1, Coro1a, Cyp26a1, Fut8, Garem, Gm13305, H2-Aa, H2Ab1, Idi1, Ifnlr1, Il11ra2, Il15, Isl1, Jak1, Klf6, Lbp, Lhx1, Lox, Magi2, Mapk3, Nog, Nos1, Nr3c2, Nub1, Osr1, Pdgfd, Pou5f1, Ptgfr, Rad51, Rbp1, Slc34a2, Snrpn, Sox2, Sox9, Tat, Tgfbr2, Tmbim6, Wwox</i> |
| GO:0048002 | antigen processing and presentation of peptide antigen | 4,17E-03 | 5                | <i>H2-Aa, H2-Ab1, H2-DMb1, H2-Q2, March1</i>                                                                                                                                                                                                                                                        |
| GO:0045580 | regulation of T cell differentiation                   | 4,49E-03 | 6                | <i>Cd83, H2-Aa, H2-DMb1, Ikzf1, Il15, Tgfbr2</i>                                                                                                                                                                                                                                                    |
| GO:0060008 | Sertoli cell differentiation                           | 5,02E-03 | 3                | <i>Fndc3a, Nup210l, Sox9</i>                                                                                                                                                                                                                                                                        |
| GO:0001503 | ossification                                           | 5,28E-03 | 9                | <i>Alpl, Figl1, Hey1, Nog, Rpl38, Sox2, Sox9, Twist1, Wwox</i>                                                                                                                                                                                                                                      |

## Functional annotation of altered F1 ATZ-derived testis H3K4me3 peaks

| ID         | Desc                                                                    | HyperP   | Obs Genes | Genes                                                                    |
|------------|-------------------------------------------------------------------------|----------|-----------|--------------------------------------------------------------------------|
| GO:0046320 | regulation of fatty acid oxidation                                      | 5,78E-03 | 3         | <i>Cnr1,Ppargc1a, Twist1</i>                                             |
| GO:0090190 | positive regulation of branching involved in ureteric bud morphogenesis | 5,78E-03 | 3         | <i>Lhx1,Nog, Sox9</i>                                                    |
| GO:0072078 | nephron tubule morphogenesis                                            | 5,78E-03 | 3         | <i>Irx1,Osr1, Sox9</i>                                                   |
| GO:0050863 | regulation of T cell activation                                         | 6,27E-03 | 9         | <i>Cd83, Coro1a, H2-Aa, H2-Ab1, H2-DMb1, Ikzf1, Il15, Ndfip1, Tgfbr2</i> |
| GO:0060042 | retina morphogenesis in camera-type eye                                 | 6,37E-03 | 4         | <i>Lhx1, Pvr13, Sox2, Sox9</i>                                           |
| GO:0034502 | protein localization to chromosome                                      | 6,61E-03 | 3         | <i>Casc5, Lrwd1, Tnks</i>                                                |
| GO:2000826 | regulation of heart morphogenesis                                       | 6,61E-03 | 3         | <i>Isl1, Sox9, Twist1</i>                                                |
| GO:0007369 | gastrulation                                                            | 6,63E-03 | 7         | <i>Eomes, Lhx1, Nog, Otx2, Pou5f1, Sox2, Tgfbr2</i>                      |
| GO:0002696 | positive regulation of leukocyte activation                             | 6,94E-03 | 9         | <i>Cd83, Coro1a, H2-Aa, H2-Ab1, H2DMb1, Ikzf1, Il15, Lbp, Tgfbr2</i>     |
| GO:2000779 | regulation of double-strand break repair                                | 7,50E-03 | 3         | <i>Figl1, Rad51, Twist1</i>                                              |
| GO:0009072 | aromatic amino acid family metabolic process                            | 7,50E-03 | 3         | <i>Dct, Tat, Tph1</i>                                                    |
| GO:0001837 | epithelial to mesenchymal transition                                    | 7,52E-03 | 4         | <i>Eomes, Hey1, Nog, Sox9</i>                                            |
| GO:0035019 | somatic stem cell maintenance                                           | 7,52E-03 | 4         | <i>Nog, Sox2, Sox9, Zhx2</i>                                             |
| GO:0042474 | middle ear morphogenesis                                                | 8,46E-03 | 3         | <i>Nog, Osr1, Rpl38</i>                                                  |
| GO:0060795 | cell fate commitment involved in formation of primary germ layer        | 8,46E-03 | 3         | <i>Eomes, Pou5f1, Sox2</i>                                               |

## Functional annotation of altered F1 ATZ-derived testis H3K4me3 peaks

| ID         | Desc                                                           | HyperP   | Obs<br>Gene<br>s | Genes                                                               |
|------------|----------------------------------------------------------------|----------|------------------|---------------------------------------------------------------------|
| GO:0090189 | regulation of branching involved in ureteric bud morphogenesis | 8,46E-03 | 3                | <i>Lhx1,Nog,Sox9</i>                                                |
| GO:0046635 | positive regulation of alpha-beta T cell activation            | 8,79E-03 | 4                | <i>Cd83,H2-Ab1,Ikzf1,Tgfbr2</i>                                     |
| GO:0090183 | regulation of kidney development                               | 9,48E-03 | 4                | <i>Lhx1,Nog,Osr1,Sox9</i>                                           |
| GO:0002066 | columnar/cuboidal epithelial cell development                  | 9,49E-03 | 3                | <i>Insm1,Klf5,Spdef</i>                                             |
| GO:0061333 | renal tubule morphogenesis                                     | 9,49E-03 | 3                | <i>Irx1,Osr1,Sox9</i>                                               |
| GO:0002064 | epithelial cell development                                    | 9,94E-03 | 10               | <i>Acta2,Capza3,Cftr,Fndc3a,Insm1,Klf5,Magi2,Nup210l,Sox9,Spdef</i> |
| GO:0006282 | regulation of DNA repair                                       | 1,10E-02 | 4                | <i>Bre,Figl1,Rad51,Twist1</i>                                       |
| GO:2001252 | positive regulation of chromosome organization                 | 1,17E-02 | 4                | <i>Jarid2,Mapk3,Nos1,Tnks</i>                                       |
| GO:0035065 | regulation of histone acetylation                              | 1,30E-02 | 3                | <i>Mapk3,Nos1,Twist1</i>                                            |

Differentially expressed genes in F3 ATZ-derived testis compared to control, containing the binding sites of Sp1/Sp3/Sp4 and Wt1 sites with more than >70% conservative score in mammalian species

| <b>SP4</b>      | <b>SP3</b>      | <b>SP1</b>      | <b>WT1</b>      |
|-----------------|-----------------|-----------------|-----------------|
| <i>Zfp644</i>   | <i>Cul5</i>     | <i>Cul5</i>     | <i>Cul5</i>     |
| <i>Cul5</i>     | <i>Zfp644</i>   | <i>Zfp644</i>   | <i>Zfp644</i>   |
| <i>Ppp1r12b</i> | <i>Maged2</i>   | <i>Ppp1r12b</i> | <i>Safb2</i>    |
| <i>Hsp90aa1</i> | <i>Ppp1r12b</i> | <i>Hsp90aa1</i> | <i>Dennd1a</i>  |
| <i>Dennd1a</i>  | <i>Dennd1a</i>  | <i>Maged2</i>   | <i>Maged2</i>   |
| <i>Surf1</i>    | <i>Hsp90aa1</i> | <i>Dennd1a</i>  | <i>Hsp90aa1</i> |
| <i>Pik3cd</i>   | <i>Pik3cd</i>   | <i>Mark2</i>    | <i>Flii</i>     |
| <i>Maged2</i>   | <i>Rbm26</i>    | <i>Flii</i>     | <i>Mark2</i>    |
| <i>Cops3</i>    | <i>Flii</i>     | <i>Pik3cd</i>   | <i>Gm10125</i>  |
| <i>Rbm26</i>    | <i>Atpaf2</i>   | <i>Atpaf2</i>   | <i>Lrwd1</i>    |
| <i>Flii</i>     | <i>Mark2</i>    | <i>Rbm26</i>    | <i>Atpaf2</i>   |
| <i>Irf7</i>     | <i>Safb2</i>    | <i>Safb2</i>    | <i>Clp1</i>     |
| <i>Atpaf2</i>   | <i>Cops3</i>    | <i>Cops3</i>    | <i>Slc35a5</i>  |
| <i>Serpine2</i> | <i>Itfg2</i>    | <i>Anxa4</i>    | <i>Itfg2</i>    |
| <i>BC029214</i> | <i>BC029214</i> | <i>Tex101</i>   | <i>Anxa4</i>    |
| <i>Gpaa1</i>    | <i>Anxa4</i>    | <i>Ssrp1</i>    | <i>Stard8</i>   |
| <i>Ssrp1</i>    | <i>Ssrp1</i>    | <i>Tanc1</i>    | <i>Usp25</i>    |
| <i>Usp25</i>    | <i>Usp25</i>    | <i>Pkdcc</i>    | <i>Tanc1</i>    |
| <i>Phf23</i>    | <i>Pkdcc</i>    | <i>Phf23</i>    | <i>Pkdcc</i>    |
| <i>Pkdcc</i>    | <i>Stag3</i>    | <i>Prrc2b</i>   | <i>Phf23</i>    |
| <i>Tanc1</i>    | <i>Tanc1</i>    | <i>Stx16</i>    | <i>Stx16</i>    |
| <i>Luc7l2</i>   | <i>Phf23</i>    | <i>Klhl15</i>   | <i>Stag3</i>    |
| <i>Stx16</i>    | <i>Klhl15</i>   | <i>Stag3</i>    | <i>Arl9</i>     |

Differentially expressed genes in F3 ATZ-derived testis, containing the binding sites of Sp1/Sp3/Sp4 and Wt1 sites with more than >70% conservative score in mammalian species

| <b>SP4</b>     | <b>SP3</b>      | <b>SP1</b>      | <b>WT1</b>      |
|----------------|-----------------|-----------------|-----------------|
| <i>Stag3</i>   | <i>Prrc2b</i>   | <i>Ap4m1</i>    | <i>Metap1d</i>  |
| <i>Klhl15</i>  | <i>Stx16</i>    | <i>Sun1</i>     | <i>Prep</i>     |
| <i>Prrc2b</i>  | <i>Sun1</i>     | <i>Ptprf</i>    | <i>Chmp3</i>    |
| <i>Sun1</i>    | <i>Luc7l2</i>   | <i>Stoml1</i>   | <i>Zbtb42</i>   |
| <i>Dcun1d4</i> | <i>Prep</i>     | <i>Hif3a</i>    | <i>Klhl15</i>   |
| <i>Prep</i>    | <i>Ptprf</i>    | <i>Tmem8</i>    | <i>Stoml1</i>   |
| <i>Hook2</i>   | <i>Stoml1</i>   | <i>Zc3h11a</i>  | <i>Trpc1</i>    |
| <i>Stoml1</i>  | <i>Hif3a</i>    | <i>Trpc1</i>    | <i>Zc3h11a</i>  |
| <i>Ptprf</i>   | <i>Tmem8</i>    | <i>Serpine2</i> | <i>Tmem8</i>    |
| <i>Zc3h11a</i> | <i>Trpc1</i>    | <i>Cers5</i>    | <i>Tspan8</i>   |
| <i>Tmem8</i>   | <i>Zc3h11a</i>  | <i>Tsr3</i>     | <i>Nudt14</i>   |
| <i>Flnb</i>    | <i>Serpine2</i> | <i>Zswim2</i>   | <i>Serpine2</i> |
| <i>Trpc1</i>   | <i>Rgcc</i>     |                 | <i>Ptprf</i>    |
| <i>Nbn</i>     | <i>Zswim2</i>   |                 |                 |
| <i>Wdr67</i>   | <i>Prkaa1</i>   |                 |                 |
| <i>Prkaa1</i>  |                 |                 |                 |
| <i>Cers5</i>   |                 |                 |                 |
| <i>Tsr3</i>    |                 |                 |                 |
| <i>Rgcc</i>    |                 |                 |                 |
| <i>Gm21982</i> |                 |                 |                 |

The altered H3K4me3 peaks near the genes, containing Sp1/Sp3/Sp4 and Wt1 binding sites sites with more than >70% conservative score in mammalian species

| <b>SP4</b>           | <b>SP3</b>           | <b>SP1</b>           | <b>WT1</b>           |
|----------------------|----------------------|----------------------|----------------------|
| <i>Dhx40</i>         | <i>Fgf18</i>         | <i>Fgf18</i>         | <i>Fgf18</i>         |
| <i>Fgf18</i>         | <i>Pabpc1l</i>       | <i>C030017K20Rik</i> | <i>Trim27</i>        |
| <i>C030017K20Rik</i> | <i>C030017K20Rik</i> | <i>Dnajib4</i>       | <i>Scube2</i>        |
| <i>Irak2</i>         | <i>Dnajib4</i>       | <i>Tmem158</i>       | <i>Irak2</i>         |
| <i>Scube2</i>        | <i>Scube2</i>        | <i>Scube2</i>        | <i>Rapgef3</i>       |
| <i>1700030C10Rik</i> | <i>Tmem158</i>       | <i>3110053B16Rik</i> | <i>Gm16257</i>       |
| <i>Tmem158</i>       | <i>Rapgef3</i>       | <i>Dhx40</i>         | <i>3110053B16Rik</i> |
| <i>Trim27</i>        | <i>Gm16257</i>       | <i>Zfat</i>          | <i>Zfp36l1</i>       |
| <i>3110053B16Rik</i> | <i>3110053B16Rik</i> | <i>Gm14290</i>       | <i>Gm17591</i>       |
| <i>Zfp36l1</i>       | <i>Zfat</i>          | <i>Etv6</i>          | <i>Gm14290</i>       |
| <i>Gm17591</i>       | <i>Dhx40</i>         | <i>Rapgef3</i>       | <i>Tmem158</i>       |
| <i>Zfat</i>          | <i>4933411K20Rik</i> | <i>Gm16257</i>       | <i>Alad</i>          |
| <i>Ogfr</i>          | <i>Gabrb3</i>        | <i>4933411K20Rik</i> | <i>Gabrb3</i>        |
| <i>Rapgef3</i>       | <i>Zhx2</i>          | <i>Pabpc1l</i>       | <i>Zhx2</i>          |
| <i>Gm16257</i>       | <i>Cux1</i>          | <i>Gabrb3</i>        | <i>Cux1</i>          |
| <i>Gabrb3</i>        | <i>Gm16599</i>       | <i>Zhx2</i>          | <i>Gm16599</i>       |
| <i>Zhx2</i>          | <i>Gpr27</i>         | <i>Cux1</i>          | <i>Zbtb44</i>        |
| <i>Cux1</i>          | <i>Tmem52</i>        | <i>Gm16599</i>       | <i>Pde4a</i>         |
| <i>Gm16599</i>       | <i>Kansl1</i>        | <i>Kansl1</i>        | <i>Arrdc3</i>        |
| <i>Kif21b</i>        | <i>1700081L11Rik</i> | <i>1700081L11Rik</i> | <i>1700023H06Rik</i> |
| <i>Col9a3</i>        | <i>Sox18</i>         | <i>Tmem52</i>        | <i>Pole3</i>         |
| <i>Arrdc3</i>        | <i>1700030C10Rik</i> | <i>Sox18</i>         | <i>Gpr27</i>         |
| <i>1700023H06Rik</i> | <i>Gm16256</i>       | <i>1700030C10Rik</i> | <i>Sox18</i>         |
| <i>Gpr27</i>         | <i>Tram1</i>         | <i>Anks1b</i>        | <i>Tatdn2</i>        |
| <i>Tmem52</i>        | <i>Anks1b</i>        | <i>Tram1</i>         | <i>Anks1b</i>        |
| <i>Tatdn2</i>        | <i>Siva1</i>         | <i>Kcnb1</i>         | <i>Gm16256</i>       |
| <i>Sox18</i>         | <i>8030451A03Rik</i> | <i>Gm16256</i>       | <i>1700030C10Rik</i> |
| <i>Kansl1</i>        | <i>Tnc</i>           | <i>8030451A03Rik</i> | <i>Tram1</i>         |
| <i>1700081L11Rik</i> | <i>Ldlrad4</i>       | <i>Tnc</i>           | <i>Kcnb1</i>         |
| <i>Mei1</i>          | <i>Pdia5</i>         | <i>Pdia5</i>         | <i>Sdk2</i>          |
| <i>Tram1</i>         | <i>Kcnb1</i>         | <i>Sdk2</i>          | <i>Pdia5</i>         |
| <i>Ldlrad4</i>       | <i>Sdk2</i>          | <i>Crocc</i>         | <i>Crocc</i>         |
| <i>Cntnap2</i>       | <i>1600014C10Rik</i> |                      |                      |
| <i>Anks1b</i>        |                      |                      |                      |
| <i>Kcnb1</i>         |                      |                      |                      |
| <i>Pdia5</i>         |                      |                      |                      |
| <i>Gm16256</i>       |                      |                      |                      |
| <i>1600014C10Rik</i> |                      |                      |                      |
| <i>Crocc</i>         |                      |                      |                      |
| <i>Akr1e1</i>        |                      |                      |                      |

Supplementary Table S11

**Genes located near F3 testis differential peaks and retained in human sperm nucleosomes**

| <i>Official_gene_symbol</i> | Name                                                                                  |
|-----------------------------|---------------------------------------------------------------------------------------|
| <i>Kcnj16</i>               | potassium inwardly-rectifying channel, subfamily J, member 16                         |
| <i>Prg4</i>                 | proteoglycan 4 (megakaryocyte stimulating factor, articular superficial zone protein) |
| <i>Slc16a1</i>              | solute carrier family 16 (monocarboxylic acid transporters), member 1                 |
| <i>Fgf18</i>                | fibroblast growth factor 18                                                           |
| <i>Mtnr1a</i>               | melatonin receptor 1A                                                                 |
| <i>Ms4a5</i>                | membrane-spanning 4-domains, subfamily A, member 5                                    |
| <i>Zcchc7</i>               | zinc finger, CCHC domain containing 7                                                 |
| <i>Dmbp1</i>                | dystrobrevin binding protein 1                                                        |
| <i>Acss3</i>                | acyl-CoA synthetase short-chain family member 3                                       |
| <i>Rasgef1b</i>             | RasGEF domain family, member 1B; hypothetical protein LOC100044232                    |
| <i>Cdkn3</i>                | cyclin-dependent kinase inhibitor 3                                                   |
| <i>A2m</i>                  | alpha-2-macroglobulin                                                                 |
| <i>Tmed5</i>                | transmembrane emp24 protein transport domain containing 5                             |
| <i>Rab31</i>                | RAB31, member RAS oncogene family                                                     |
| <i>Nkain3</i>               | Na <sup>+</sup> /K <sup>+</sup> transporting ATPase interacting 3                     |
| <i>Tram111</i>              | translocation associated membrane protein 1-like 1                                    |
| <i>Ppcdc</i>                | phosphopantothenoylcysteine decarboxylase                                             |
| <i>Arrdc4</i>               | arrestin domain containing 4                                                          |
| <i>Cog7</i>                 | component of oligomeric golgi complex 7                                               |
| <i>Arl6</i>                 | ADP-ribosylation factor-like 6                                                        |
| <i>Tph2</i>                 | tryptophan hydroxylase 2                                                              |
| <i>Rgmb</i>                 | RGM domain family, member B                                                           |
| <i>Prss48</i>               | predicted gene 1019                                                                   |
| <i>Itga11</i>               | integrin alpha 11                                                                     |
| <i>Cpm</i>                  | carboxypeptidase M                                                                    |
| <i>Gpx8</i>                 | glutathione peroxidase 8 (putative)                                                   |
| <i>Xylt1</i>                | xylosyltransferase 1                                                                  |
| <i>Rfx8</i>                 | RIKEN cDNA 4933400N17 gene                                                            |
| <i>Cux2</i>                 | cut-like homeobox 2                                                                   |
| <i>Cftr</i>                 | cystic fibrosis transmembrane conductance regulator homolog                           |
| <i>Qsox1</i>                | quiescin Q6 sulfhydryl oxidase 1                                                      |
| <i>Grhpr</i>                | glyoxylate reductase/hydroxypyruvate reductase                                        |
| <i>Arl4d</i>                | ADP-ribosylation factor-like 4D; hypothetical protein LOC100044157                    |

Supplementary Table S11

|                 |                                                                                                        |
|-----------------|--------------------------------------------------------------------------------------------------------|
| <i>Nr3c2</i>    | nuclear receptor subfamily 3, group C, member 2                                                        |
| <i>Dkk2</i>     | dickkopf homolog 2 ( <i>Xenopus laevis</i> )                                                           |
| <i>Fchs2</i>    | FCH and double SH3 domains 2                                                                           |
| <i>Med10</i>    | mediator of RNA polymerase II transcription, subunit 10 homolog ( <i>NUT2</i> , <i>S. cerevisiae</i> ) |
| <i>Tmem202</i>  | transmembrane protein 202                                                                              |
| <i>Hebp2</i>    | heme binding protein 2                                                                                 |
| <i>Tmco1</i>    | transmembrane and coiled-coil domains 1                                                                |
| <i>Evi5</i>     | ecotropic viral integration site 5                                                                     |
| <i>Slc25a4</i>  | solute carrier family 25 (mitochondrial carrier, adenine nucleotide translocator), member 4            |
| <i>Stk33</i>    | serine/threonine kinase 33                                                                             |
| <i>Gzma</i>     | granzyme A                                                                                             |
| <i>Nkain1</i>   | Na <sup>+</sup> /K <sup>+</sup> transporting ATPase interacting 1                                      |
| <i>Kank1</i>    | KN motif and ankyrin repeat domains 1                                                                  |
| <i>Fgl2</i>     | fibrinogen-like protein 2                                                                              |
| <i>Il1r2</i>    | interleukin 1 receptor, type II                                                                        |
| <i>Phf1</i>     | putative homeodomain transcription factor 1                                                            |
| <i>Oxr1</i>     | oxidation resistance 1                                                                                 |
| <i>Tmem200b</i> | transmembrane protein 200B                                                                             |
| <i>Abcc4</i>    | ATP-binding cassette, sub-family C (CFTR/MRP), member 4                                                |
| <i>Cgnl1</i>    | cingulin-like 1                                                                                        |
| <i>Ldhb</i>     | lactate dehydrogenase B; predicted gene 5514                                                           |
| <i>Epc2</i>     | enhancer of polycomb homolog 2                                                                         |
| <i>Ywhaq</i>    | tyrosine 3-monooxygenase/tryptophan 5-monooxygenase activation protein, theta polypeptide              |
| <i>Arhgap29</i> | Rho GTPase activating protein 29                                                                       |
| <i>Pla2g4a</i>  | phospholipase A2, group IVA (cytosolic, calcium-dependent)                                             |
| <i>Gpx5</i>     | glutathione peroxidase 5                                                                               |
| <i>Zfp361l1</i> | zinc finger protein 36, C3H type-like 1                                                                |
| <i>Als2cr12</i> | amyotrophic lateral sclerosis 2 (juvenile) chromosome region, candidate 12 (human)                     |
| <i>Veph1</i>    | ventricular zone expressed PH domain homolog 1 (zebrafish)                                             |
| <i>Cdc6</i>     | cell division cycle 6 homolog                                                                          |
| <i>Tnc</i>      | tenascin C                                                                                             |
| <i>Hmcn1</i>    | hemicentin 1                                                                                           |
| <i>Sox6</i>     | SRY-box containing gene 6                                                                              |



|                |                                                                         |
|----------------|-------------------------------------------------------------------------|
| <i>Slc24a3</i> | solute carrier family 24 (sodium/potassium/calcium exchanger), member 3 |
| <i>Myo3b</i>   | myosin IIIB                                                             |
| <i>Gtf2e1</i>  | general transcription factor II E, polypeptide 1 (alpha subunit)        |
| <i>Mdn1</i>    | midasin homolog (yeast)                                                 |
| <i>Slc38a9</i> | solute carrier family 38, member 9                                      |
| <i>Sgol1</i>   | shugoshin-like 1 (S. pombe)                                             |
| <i>Mapkbp1</i> | mitogen-activated protein kinase binding protein 1                      |
| <i>Pdzr3</i>   | PDZ domain containing RING finger 3                                     |
| <i>Col4a1</i>  | collagen, type IV, alpha 1                                              |
| <i>Tnks</i>    | tankyrase, TRF1-interacting ankyrin-related ADP-ribose polymerase       |
| <i>Lmo1</i>    | LIM domain only 1                                                       |
| <i>Fndc3a</i>  | fibronectin type III domain containing 3A                               |
| <i>Cpsf6</i>   | cleavage and polyadenylation specific factor 6                          |
| <i>Wnt11</i>   | wingless-related MMTV integration site 11                               |
| <i>Frmd4b</i>  | FERM domain containing 4B                                               |
| <i>Sgk1</i>    | serum/glucocorticoid regulated kinase 1                                 |
| <i>Fam109a</i> | family with sequence similarity 109, member A                           |
| <i>Abca9</i>   | ATP-binding cassette, sub-family A (ABC1), member 9                     |
| <i>Fscb</i>    | fibrous sheath CABYR binding protein                                    |
| <i>Mme</i>     | membrane metallo endopeptidase                                          |
| <i>Tnfai3</i>  | tumor necrosis factor, alpha-induced protein 8                          |
| <i>Nfe2l3</i>  | nuclear factor, erythroid derived 2, like 3                             |
| <i>Fam65b</i>  | family with sequence similarity 65, member B                            |
| <i>Zfat</i>    | zinc finger and AT hook domain containing                               |
| <i>Actr6</i>   | ARP6 actin-related protein 6 homolog (yeast)                            |
| <i>Mast4</i>   | microtubule associated serine/threonine kinase family member 4          |
| <i>Dynlrb2</i> | dynein light chain roadblock-type 2                                     |
| <i>Maf</i>     | avian musculoaponeurotic fibrosarcoma oncogene homolog                  |
| <i>Ergic1</i>  | endoplasmic reticulum-golgi intermediate compartment (ERGIC) 1          |
| <i>Nat8l</i>   | N-acetyltransferase 8-like                                              |
| <i>Lhfp12</i>  | lipoma HMGIC fusion partner-like 2                                      |
| <i>Phactr1</i> | phosphatase and actin regulator 1                                       |
| <i>Afap111</i> | actin filament associated protein 1-like 1                              |
| <i>Dicer1</i>  | Dicer1, Dcr-1 homolog (Drosophila)                                      |
| <i>Isca1</i>   | iron-sulfur cluster assembly 1 homolog (S. cerevisiae)                  |
| <i>Psm7</i>    | proteasome (prosome, macropain) 26S subunit, non-ATPase, 7              |
| <i>Tmem158</i> | transmembrane protein 158                                               |

|                |                                                                                                                                             |
|----------------|---------------------------------------------------------------------------------------------------------------------------------------------|
| <i>Rasef</i>   | RAS and EF hand domain containing                                                                                                           |
| <i>Tiam1</i>   | T-cell lymphoma invasion and metastasis 1                                                                                                   |
| <i>Zfp64</i>   | zinc finger protein 64                                                                                                                      |
| <i>Klkb1</i>   | kallikrein B, plasma 1                                                                                                                      |
| <i>Tgif1</i>   | TGFB-induced factor homeobox 1                                                                                                              |
| <i>Abra</i>    | actin-binding Rho activating protein                                                                                                        |
| <i>Tulp4</i>   | tubby like protein 4                                                                                                                        |
| <i>Txndc2</i>  | thioredoxin domain containing 2 (spermatzoa)                                                                                                |
| <i>Dir2</i>    | disrupted in renal carcinoma 2 (human)                                                                                                      |
| <i>Alcam</i>   | activated leukocyte cell adhesion molecule                                                                                                  |
| <i>Pdzrn4</i>  | PDZ domain containing RING finger 4                                                                                                         |
| <i>Galm</i>    | galactose mutarotase                                                                                                                        |
| <i>Sema5b</i>  | sema domain, seven thrombospondin repeats (type 1 and type 1-like), transmembrane domain (TM) and short cytoplasmic domain, (semaphorin) 5B |
| <i>Zc3h13</i>  | zinc finger CCCH type containing 13                                                                                                         |
| <i>Tmem144</i> | transmembrane protein 144                                                                                                                   |
| <i>Dlgap1</i>  | discs, large (Drosophila) homolog-associated protein 1                                                                                      |
| <i>Bcl2l14</i> | BCL2-like 14 (apoptosis facilitator)                                                                                                        |
| <i>Lphn3</i>   | latrophilin 3                                                                                                                               |
| <i>Mtif3</i>   | mitochondrial translational initiation factor 3                                                                                             |
| <i>Cd180</i>   | CD180 antigen                                                                                                                               |
| <i>Abca4</i>   | ATP-binding cassette, sub-family A (ABC1), member 4                                                                                         |
| <i>Cabin1</i>  | calcineurin binding protein 1                                                                                                               |
| <i>Fnip1</i>   | folliculin interacting protein 1                                                                                                            |
| <i>Spin1</i>   | spindlin 1                                                                                                                                  |
| <i>Slc26a3</i> | solute carrier family 26, member 3                                                                                                          |
| <i>Edn1</i>    | endothelin 1                                                                                                                                |
| <i>Mmadhc</i>  | methylmalonic aciduria (cobalamin deficiency) cblD type, with homocystinuria                                                                |
| <i>Mkl2</i>    | MKL/myocardin-like 2                                                                                                                        |
| <i>Siah3</i>   | seven in absentia homolog 3 (Drosophila)                                                                                                    |
| <i>Pdia4</i>   | protein disulfide isomerase associated 4                                                                                                    |
| <i>Barhl2</i>  | BarH-like 2 (Drosophila)                                                                                                                    |
| <i>Atp10a</i>  | ATPase, class V, type 10A                                                                                                                   |
| <i>Foxk1</i>   | forkhead box K1                                                                                                                             |
| <i>Cops8</i>   | COP9 (constitutive photomorphogenic) homolog, subunit 8 (Arabidopsis thaliana)                                                              |
| <i>Parn</i>    | poly(A)-specific ribonuclease (deadenylation nuclease)                                                                                      |
| <i>Kif21b</i>  | kinesin family member 21B                                                                                                                   |
| <i>Hrh4</i>    | histamine receptor H4                                                                                                                       |
| <i>Rnd3</i>    | Rho family GTPase 3                                                                                                                         |
| <i>Arrdc3</i>  | arrestin domain containing 3                                                                                                                |

|                |                                                                                                            |
|----------------|------------------------------------------------------------------------------------------------------------|
| <i>Lmbr1</i>   | limb region 1                                                                                              |
| <i>Lpin1</i>   | lipin 1                                                                                                    |
| <i>Galnt10</i> | UDP-N-acetyl-alpha-D-galactosamine:polypeptide N-acetylgalactosaminyltransferase 10                        |
| <i>Mak16</i>   | MAK16 homolog ( <i>S. cerevisiae</i> )                                                                     |
| <i>App</i>     | amyloid beta (A4) precursor protein                                                                        |
| <i>Vrk1</i>    | vaccinia related kinase 1                                                                                  |
| <i>Kcnj8</i>   | potassium inwardly-rectifying channel, subfamily J, member 8                                               |
| <i>Utp23</i>   | UTP23, small subunit (SSU) processome component, homolog (yeast)                                           |
| <i>Basp1</i>   | brain abundant, membrane attached signal protein 1                                                         |
| <i>Tram1</i>   | translocating chain-associating membrane protein 1                                                         |
| <i>Zhx2</i>    | zinc fingers and homeoboxes 2                                                                              |
| <i>Fam120a</i> | family with sequence similarity 120, member A                                                              |
| <i>Wdfy3</i>   | WD repeat and FYVE domain containing 3                                                                     |
| <i>Arid2</i>   | AT rich interactive domain 2 (ARID, RFX-like); RIKEN cDNA 1700124K17 gene                                  |
| <i>N6amt1</i>  | N-6 adenine-specific DNA methyltransferase 1 (putative)                                                    |
| <i>Ramp3</i>   | receptor (calcitonin) activity modifying protein 3                                                         |
| <i>Map3k7</i>  | mitogen-activated protein kinase kinase kinase 7; predicted gene 8188                                      |
| <i>Ylpm1</i>   | YLP motif containing 1                                                                                     |
| <i>Grid1</i>   | glutamate receptor, ionotropic, delta 1                                                                    |
| <i>Dcn</i>     | decorin                                                                                                    |
| <i>Sap30l</i>  | SAP30-like                                                                                                 |
| <i>Mapt</i>    | microtubule-associated protein tau                                                                         |
| <i>Myh4</i>    | myosin, heavy polypeptide 4, skeletal muscle                                                               |
| <i>Traf7d1</i> | TRAF type zinc finger domain containing 1                                                                  |
| <i>Cul1</i>    | cullin 1                                                                                                   |
| <i>Ptplad2</i> | protein tyrosine phosphatase-like A domain containing 2                                                    |
| <i>Ndst3</i>   | N-deacetylase/N-sulfotransferase (heparan glucosaminyl) 3                                                  |
| <i>Cstf2t</i>  | cleavage stimulation factor, 3' pre-RNA subunit 2, tau                                                     |
| <i>Pak6</i>    | p21 protein (Cdc42/Rac)-activated kinase 6                                                                 |
| <i>Dennd1b</i> | DENN/MADD domain containing 1B                                                                             |
| <i>Prkrir</i>  | protein-kinase, interferon-inducible double stranded RNA dependent inhibitor, repressor of (P58 repressor) |
| <i>Dmrt1</i>   | doublesex and mab-3 related transcription factor 1                                                         |

|                 |                                                                                           |
|-----------------|-------------------------------------------------------------------------------------------|
| <i>Spam1</i>    | sperm adhesion molecule 1                                                                 |
| <i>Crb1</i>     | crumbs homolog 1 ( <i>Drosophila</i> )                                                    |
| <i>Gxylt1</i>   | glycosyltransferase 8 domain containing 3                                                 |
| <i>Runx1</i>    | runt related transcription factor 1                                                       |
| <i>Wapal</i>    | wings apart-like homolog ( <i>Drosophila</i> )                                            |
| <i>Gpr98</i>    | G protein-coupled receptor 98                                                             |
| <i>Adcy1</i>    | adenylate cyclase 1                                                                       |
| <i>Cdca2</i>    | cell division cycle associated 2                                                          |
| <i>Asap2</i>    | development and differentiation enhancing factor 2                                        |
| <i>Ano6</i>     | anoctamin 6                                                                               |
| <i>Nek11</i>    | NIMA (never in mitosis gene a)-related expressed kinase 11                                |
| <i>Cdc7</i>     | cell division cycle 7 ( <i>S. cerevisiae</i> )                                            |
| <i>Shroom3</i>  | shroom family member 3                                                                    |
| <i>Spry1</i>    | sprouty homolog 1 ( <i>Drosophila</i> )                                                   |
| <i>Scamp1</i>   | secretory carrier membrane protein 1                                                      |
| <i>Ednra</i>    | endothelin receptor type A                                                                |
| <i>Ccdc39</i>   | coiled-coil domain containing 39                                                          |
| <i>Trhde</i>    | TRH-degrading enzyme                                                                      |
| <i>Phf2</i>     | PHD finger protein 2                                                                      |
| <i>Anks1b</i>   | ankyrin repeat and sterile alpha motif domain containing 1B                               |
| <i>Efna5</i>    | ephrin A5                                                                                 |
| <i>Stxbp5l</i>  | syntaxin binding protein 5-like                                                           |
| <i>Kif5c</i>    | kinesin family member 5C                                                                  |
| <i>Sall3</i>    | sal-like 3 ( <i>Drosophila</i> )                                                          |
| <i>Ptpn3</i>    | protein tyrosine phosphatase, non-receptor type 3                                         |
| <i>Bmpr2</i>    | bone morphogenic protein receptor, type II (serine/threonine kinase)                      |
| <i>Lzts1</i>    | leucine zipper, putative tumor suppressor 1                                               |
| <i>Rnf38</i>    | ring finger protein 38                                                                    |
| <i>Otud6b</i>   | OTU domain containing 6B; predicted gene 12444                                            |
| <i>F11</i>      | coagulation factor XI                                                                     |
| <i>Atp6v1g3</i> | ATPase, H <sup>+</sup> transporting, lysosomal V1 subunit G3                              |
| <i>Dgkh</i>     | diacylglycerol kinase, eta                                                                |
| <i>Lhx4</i>     | LIM homeobox protein 4                                                                    |
| <i>Rpl38</i>    | ribosomal protein L38                                                                     |
| <i>Ino80c</i>   | INO80 complex subunit C                                                                   |
| <i>Atp5j</i>    | ATP synthase, H <sup>+</sup> transporting, mitochondrial F0 complex, subunit F pseudogene |
| <i>Arid1b</i>   | AT rich interactive domain 1B (SWI-like)                                                  |
| <i>Kcnk2</i>    | potassium channel, subfamily K, member 2                                                  |
| <i>Galr1</i>    | galanin receptor 1                                                                        |

|                |                                                                            |
|----------------|----------------------------------------------------------------------------|
| <i>Trpc7</i>   | transient receptor potential cation channel, subfamily C, member 7         |
| <i>Pdia5</i>   | protein disulfide isomerase associated 5                                   |
| <i>Mctp2</i>   | multiple C2 domains, transmembrane 2                                       |
| <i>Dio3</i>    | deiodinase, iodothyronine type III                                         |
| <i>Exoc8</i>   | exocyst complex component 8                                                |
| <i>Rps29</i>   | ribosomal protein S29                                                      |
| <i>Sdk2</i>    | sidekick homolog 2 (chicken)                                               |
| <i>Zbtb40</i>  | zinc finger and BTB domain containing 40                                   |
| <i>Ppp4r2</i>  | protein phosphatase 4, regulatory subunit 2                                |
| <i>Nek7</i>    | NIMA (never in mitosis gene a)-related expressed kinase 7                  |
| <i>Bach2</i>   | BTB and CNC homology 2                                                     |
| <i>Sclt1</i>   | sodium channel and clathrin linker 1                                       |
| <i>Zfp2</i>    | zinc finger protein, multitype 2                                           |
| <i>Rad23b</i>  | RAD23b homolog (S. cerevisiae)                                             |
| <i>Anapc4</i>  | anaphase promoting complex subunit 4                                       |
| <i>Chchd2</i>  | coiled-coil-helix-coiled-coil-helix domain containing 2                    |
| <i>Chsy3</i>   | chondroitin sulfate synthase 3                                             |
| <i>Abca6</i>   | ATP-binding cassette, sub-family A (ABC1), member 6                        |
| <i>Zfx3</i>    | zinc finger homeobox 3                                                     |
| <i>Apaf1</i>   | apoptotic peptidase activating factor 1                                    |
| <i>Trim24</i>  | tripartite motif-containing 24                                             |
| <i>Znfm2</i>   | zinc finger, MYM-type 2                                                    |
| <i>Cep170</i>  | centrosomal protein 170                                                    |
| <i>Siah2</i>   | seven in absentia 2                                                        |
| <i>Sox14</i>   | SRY-box containing gene 14                                                 |
| <i>Fam198b</i> | RIKEN cDNA 1110032E23 gene                                                 |
| <i>Cdh10</i>   | cadherin 10                                                                |
| <i>Tnfrsf8</i> | tumor necrosis factor (ligand) superfamily, member 8                       |
| <i>Cbl1</i>    | Casitas B-lineage lymphoma-like 1                                          |
| <i>Kctd3</i>   | predicted gene 7553; potassium channel tetramerisation domain containing 3 |
| <i>Pgk2</i>    | phosphoglycerate kinase 2                                                  |
| <i>Magi3</i>   | membrane associated guanylate kinase, WW and PDZ domain containing 3       |
| <i>Scrn1</i>   | secernin 1                                                                 |
| <i>Dctd</i>    | dCMP deaminase                                                             |
| <i>Crocc</i>   | ciliary rootlet coiled-coil, rootletin                                     |
| <i>Clic6</i>   | chloride intracellular channel 6                                           |
| <i>Sp5</i>     | trans-acting transcription factor 5                                        |
| <i>Camta1</i>  | calmodulin binding transcription activator 1                               |
| <i>Muc5b</i>   | mucin 5, subtype B, tracheobronchial                                       |
| <i>Il20rb</i>  | interleukin 20 receptor beta                                               |

|                |                                                                                  |
|----------------|----------------------------------------------------------------------------------|
| <i>Gtf2h5</i>  | general transcription factor IIIH, polypeptide 5                                 |
| <i>Msrb2</i>   | methionine sulfoxide reductase B2                                                |
| <i>Smpd3a</i>  | sphingomyelin phosphodiesterase, acid-like 3A                                    |
| <i>Nmnat3</i>  | nicotinamide nucleotide adenylyltransferase 3                                    |
| <i>Cdk1</i>    | cell division cycle 2 homolog A (S. pombe)                                       |
| <i>Stk35</i>   | serine/threonine kinase 35                                                       |
| <i>Asxl2</i>   | additional sex combs like 2 (Drosophila)                                         |
| <i>Tollip</i>  | toll interacting protein                                                         |
| <i>Tmem66</i>  | transmembrane protein 66                                                         |
| <i>Arglu1</i>  | arginine and glutamate rich 1                                                    |
| <i>Akap9</i>   | A kinase (PRKA) anchor protein (yotiao) 9                                        |
| <i>Rnf32</i>   | ring finger protein 32                                                           |
| <i>Gpr149</i>  | G protein-coupled receptor 149                                                   |
| <i>Dscr3</i>   | Down syndrome critical region gene 3                                             |
| <i>Zbtb44</i>  | zinc finger and BTB domain containing 44                                         |
| <i>Adss</i>    | adenylosuccinate synthetase, non muscle                                          |
| <i>Rad21</i>   | RAD21 homolog (S. pombe)                                                         |
| <i>Rgma</i>    | RGM domain family, member A                                                      |
| <i>Agk</i>     | predicted gene 8546; acylglycerol kinase                                         |
| <i>Klf13</i>   | Kruppel-like factor 13                                                           |
| <i>Gdi2</i>    | predicted gene 4973; guanosine diphosphate (GDP) dissociation inhibitor 2        |
| <i>Nucb2</i>   | nucleobindin 2                                                                   |
| <i>Edil3</i>   | EGF-like repeats and discoidin I-like domains 3                                  |
| <i>Nup153</i>  | nucleoporin 153                                                                  |
| <i>Tshz3</i>   | teashirt zinc finger family member 3                                             |
| <i>Mtrf1</i>   | mitochondrial translational release factor 1                                     |
| <i>Atg16l2</i> | autophagy related 16 like 2 (S. cerevisiae)                                      |
| <i>Prex2</i>   | phosphatidylinositol-3,4,5-trisphosphate-dependent Rac exchange factor 2         |
| <i>Map2k6</i>  | mitogen-activated protein kinase kinase 6                                        |
| <i>Col6a3</i>  | collagen, type VI, alpha 3                                                       |
| <i>Trpm1</i>   | transient receptor potential cation channel, subfamily M, member 1               |
| <i>Uck2</i>    | uridine-cytidine kinase 2                                                        |
| <i>Vps52</i>   | vacuolar protein sorting 52 (yeast)                                              |
| <i>Clybl</i>   | citrate lyase beta like                                                          |
| <i>Sipa112</i> | hypothetical protein LOC676463; signal-induced proliferation-associated 1 like 2 |
| <i>Sod1</i>    | superoxide dismutase 1, soluble                                                  |
| <i>Ezh2</i>    | enhancer of zeste homolog 2 (Drosophila)                                         |
| <i>Ppm1l</i>   | protein phosphatase 1 (formerly 2C)-like                                         |
| <i>Cep290</i>  | centrosomal protein 290                                                          |
| <i>Tsc22d2</i> | TSC22 domain family, member 2                                                    |
| <i>Gpc6</i>    | glypican 6                                                                       |
| <i>Rbm26</i>   | RNA binding motif protein 26                                                     |

|                 |                                                                                                           |
|-----------------|-----------------------------------------------------------------------------------------------------------|
| <i>Spock1</i>   | sparc/osteonectin, cwcv and kazal-like domains proteoglycan 1                                             |
| <i>Il2</i>      | interleukin 2                                                                                             |
| <i>Pld5</i>     | phospholipase D family, member 5                                                                          |
| <i>Jmjd1c</i>   | jumonji domain containing 1C                                                                              |
| <i>Clcn3</i>    | chloride channel 3                                                                                        |
| <i>Shroom1</i>  | shroom family member 1                                                                                    |
| <i>Btg1</i>     | B-cell translocation gene 1, anti-proliferative                                                           |
| <i>Gabbr3</i>   | gamma-aminobutyric acid (GABA) A receptor, subunit beta 3                                                 |
| <i>Arih1</i>    | ariadne ubiquitin-conjugating enzyme E2 binding protein homolog 1 (Drosophila)                            |
| <i>Sema3c</i>   | sema domain, immunoglobulin domain (Ig), short basic domain, secreted, (semaphorin) 3C                    |
| <i>Shox2</i>    | short stature homeobox 2                                                                                  |
| <i>Lrrtm3</i>   | leucine rich repeat transmembrane neuronal 3                                                              |
| <i>Coro2b</i>   | coronin, actin binding protein, 2B                                                                        |
| <i>Wrn</i>      | Werner syndrome homolog                                                                                   |
| <i>Ivns1abp</i> | influenza virus NS1A binding protein                                                                      |
| <i>Tgfbr3</i>   | transforming growth factor, beta receptor III                                                             |
| <i>Asz1</i>     | ankyrin repeat, SAM and basic leucine zipper domain containing 1                                          |
| <i>Ccdc62</i>   | coiled-coil domain containing 62                                                                          |
| <i>Serp2</i>    | stress-associated endoplasmic reticulum protein family member 2                                           |
| <i>Kpna4</i>    | karyopherin (importin) alpha 4                                                                            |
| <i>Hs3st5</i>   | heparan sulfate (glucosamine) 3-O-sulfotransferase 5                                                      |
| <i>Arhgap24</i> | Rho GTPase activating protein 24                                                                          |
| <i>Fat1</i>     | FAT tumor suppressor homolog 1 (Drosophila)                                                               |
| <i>Ggh</i>      | gamma-glutamyl hydrolase                                                                                  |
| <i>Ppfi2</i>    | protein tyrosine phosphatase, receptor type, f polypeptide (PTPRF), interacting protein (liprin), alpha 2 |
| <i>Ube2e2</i>   | ubiquitin-conjugating enzyme E2E 2 (UBC4/5 homolog, yeast)                                                |
| <i>Srbd1</i>    | S1 RNA binding domain 1                                                                                   |
| <i>Pfn2</i>     | profilin 2                                                                                                |
| <i>Zcchc9</i>   | zinc finger, CCHC domain containing 9                                                                     |
| <i>Sdc3</i>     | syndecan 3                                                                                                |
| <i>Lmod3</i>    | leiomodin 3 (fetal)                                                                                       |
| <i>Kansl1</i>   | KAT8 regulatory NSL complex subunit 1                                                                     |
| <i>Map10</i>    | microtubule-associated protein 10                                                                         |
| <i>Asic2</i>    | acid-sensing (proton-gated) ion channel 2                                                                 |
| <i>Cers6</i>    | ceramide synthase 6                                                                                       |
| <i>Vwa8</i>     | von Willebrand factor A domain containing 8                                                               |

|                 |                                                              |
|-----------------|--------------------------------------------------------------|
| <i>Tmem178b</i> | transmembrane protein 178                                    |
| <i>Caap1</i>    | caspase activity and apoptosis inhibitor 1                   |
| <i>Tenn3</i>    | teneurin transmembrane protein 3                             |
| <i>Focad</i>    | focadhesin                                                   |
| <i>Saysd1</i>   | SAYSVFN motif domain containing 1                            |
| <i>Scp2d1</i>   | SCP2 sterol-binding domain containing 1                      |
| <i>Tmem242</i>  | transmembrane protein 242                                    |
| <i>Gsap</i>     | gamma-secretase activating protein                           |
| <i>Ldlrad4</i>  | low density lipoprotein receptor class A domain containing 4 |
| <i>Uri1</i>     | URI1, prefoldin-like chaperone                               |

## Common regions affected in vinclozolin transgenerational and this studies

| <b>Official symbol</b> | <b>Official Full Name</b>                            | <b>Function of the protein</b>                                                                                                                                                                                                           | <b>FC, in our data</b> |
|------------------------|------------------------------------------------------|------------------------------------------------------------------------------------------------------------------------------------------------------------------------------------------------------------------------------------------|------------------------|
| <i>Cwc22</i>           | CWC22 spliceosome-associated protein                 | Plays role in mRNA splicing                                                                                                                                                                                                              | 3.21                   |
| <i>Slmo2</i>           | slowmo homolog 2 (Drosophila)                        | The protein has the phosphatidic acid transporter activity                                                                                                                                                                               | 2.34                   |
| <i>Lrrc61</i>          | leucine rich repeat containing 61                    | ND                                                                                                                                                                                                                                       | 2.16                   |
| <i>Etv1</i>            | Ets variant 1                                        | The ETS proteins regulate genes that modulate the cell growth, angiogenesis, migration, proliferation and differentiation                                                                                                                | 1.68                   |
| <i>1700123k08Rik</i>   | RIKEN cDNA 1700123K08 gene                           | ND                                                                                                                                                                                                                                       | 1.51                   |
| <i>Dcxr</i>            | dicarbonyl L-xylulose reductase                      | Protein plays role oxidation-reduction process                                                                                                                                                                                           | 1.47                   |
| <i>Sepw1</i>           | selenoprotein W, muscle 1                            | Protein is highly expressed in proliferating myoblasts and suggested to be involved in muscle growth and differentiation by protecting the developing myoblasts from oxidative stress.                                                   | 1.38                   |
| <i>Pibf1</i>           | progesterone immunomodulatory binding factor 1       | Mediator of progesterone that by acting on the phospholipase A2 enzyme interferes with arachidonic acid metabolism, induces a Th2 biased immune response, and by controlling NK activity exerts an anti-abortive effect                  | 1.37                   |
| <i>Skap1</i>           | src family associated phosphoprotein 1               | The encoded protein plays a critical role in inside-out signaling by coupling T-cell antigen receptor stimulation to the activation of integrins                                                                                         | 1.33                   |
| <i>Sepn1</i>           | selenoprotein N, 1                                   | The function of this gene in mouse is not known, however, mutations in the homologous gene in human are associated with multiminicore disease and rigid spine muscular dystrophy                                                         | 1.31                   |
| <i>Bop1</i>            | block of proliferation 1                             | Block of proliferation 1 (BOP1) protein plays an oncogenic role in hepatocellular carcinoma by promoting epithelial-to-mesenchymal transition.                                                                                           | 1.28                   |
| <i>Itgb3</i>           | integrin beta 3                                      | Integrins are known to participate in cell adhesion as well as cell-surface mediated signalling                                                                                                                                          | 1.26                   |
| <i>Arl6ip4</i>         | ADP-ribosylation factor-like 6 interacting protein 4 | Involved in modulating alternative pre-mRNA splicing with either 5 distal site activation or preferential use of 3 proximal site. In case of infection by Herpes simplex virus (HSV1), may act as a splicing inhibitor of HSV1 pre-mRNA. | 1.22                   |

Supplementary Table S13  
The primers used for QPCR analysis

| Gene              | 5'→3', forward                | 5'→3', reverse                          |
|-------------------|-------------------------------|-----------------------------------------|
| <u>Poteg</u>      | CACTTATCCACCACCCAAACC         | GTCGTCCCAAAGTCTAOCCTCAG                 |
| <u>Specc1</u>     | ATGCTOCATCAACGACTAACC         | TAGTCCAGAACCTOOGTTCTC                   |
| <u>Xkr7</u>       | CCACTTAOCACAGAAACAGAAACC      | ATAGTOGOCCTTCTTTCAACC                   |
| <u>Rfx8</u>       | T TAAATCCTOCACCTTCTOCAGTTCTTG | GGCTCAOCTGTGTCTOCAT                     |
| <u>Cwc22</u>      | GAGAAOCTOCAOCCAAGTGAA         | TCAAGGAACAGTAOCGACACCAT                 |
| <u>Cit</u>        | AAACTTCTAOCCTGTCCAAAACAACCTC  | GCCTOCATCGTTGCTTCT                      |
| <u>AurkC</u>      | CAGCAOCTCAOCCAGAAGCATT        | T CCTTGAGOOAGACCAAGTA                   |
| <u>Lgals3bp</u>   | AAAGGTTCCAGAGGTTGTCCAC        | CCAGGGACTCAAGTACAGAAGA                  |
| <u>Npb</u>        | GTAAGGAGOCCTTGTGOCAG          | T CAGGTGCTCTGGCAATCAGT                  |
| <u>Ifi27</u>      | GCTTCAOCCOCTCAGGAAT           | GTCOAGCAGCTCAGCAGACT                    |
| <u>Cyp21a1</u>    | CAGTTCOCCAAOCCATCTCATOC       | TCAOCCOCTGAATOCAGAAG                    |
| <u>Ifi272a</u>    | GAGTCCAAGGAOCCCTGCTGATT       | ACTOCCTAAGTTCTTCTATGCTCT                |
| <u>Phytip</u>     | AGCATGOCAGAOCCACTGT           | GATGGCATAGTGGTAGGCTGTGT                 |
| <u>Aars2</u>      | CCAOCCAGOOCTACTAOCOA          | CCCAATGATCAOCCAAGTCTOCC                 |
| <u>Spir2d</u>     | CTOCAAGGCTTTCTGGTGT           | CAGGAAOCCATCAOCCGGTCCAC                 |
| <u>Crtam</u>      | GAAAGGAGTCATAACACGGTCA        | ACCAGCTTCTTCAOCCATTCCAG                 |
| <u>Cdk1</u>       | CCAGAGCTTGAAGATOCCTGAAGA      | GTACCGATCTOCAGAAGTGTG                   |
| <u>Ctc1</u>       | CTGCTCAGATACAGAAAGAAATOC      | GGGCTAATTCAOCCAAGTGTC                   |
| <u>Rif1</u>       | AGCAACAGTGAATCTOCTGG          | GOGAACCTTCTTTCATCOGT                    |
| <u>Irwd1</u>      | CAACACAGATOCCTGAAGTGCC        | AGTGAGGTAGGTGAAGGCTG                    |
| <u>Mis18</u>      | CGTTGAAAGTTACACCTTAGGGTC      | GGCTGTCAGGACTTCTTCCA                    |
| <u>Nbn</u>        | GCCAAGCAGACAAGAACTCAG         | GTTATTOCTACATCAACAAGCAG                 |
| <u>Mus81</u>      | GCATCATAAGCAGOCAGGA           | CTGTCAAGAACAAGOOCCAGT                   |
| <u>F box6</u>     | GTTGTCCAGGAAAGCTTGTGOCA       | GAACCCGTGTGCTGAAAGAAOC                  |
| <u>Chd1</u>       | ACCAAGATAGOCCTGTTTCTG         | GCATOCCAACTTACAATACTACTTTC              |
| <u>Morf42</u>     | GCTOCTCTCATCTTACTTCTCTG       | GAAAGAAGGAACATTGTGGTTGG                 |
| <u>Ssrp1</u>      | CAGCATTGAAAGGAGGAGTATGG       | TCTTCATCAGAGTCCAGCATAATOGT              |
| <u>Dnmt3a</u>     | GCAGGAGAGGGCAAAGAACAG         | CAGCCACTCATCOOGTTTTC                    |
| <u>Dnmt3b</u>     | T TTAAGTAACCCGTGCTOCA         | GGAAATGCTACAAGAOCACAG                   |
| <u>Dnmt3l</u>     | GCCCTTCTTCTGGATATTCATGGAC     | ACTCTTCTTCTTGGGGTCCAG                   |
| <u>Retro- B1</u>  | TGGTGGTGCATGOCCTTAAT          | CCTGGTGTGCTGGAACCTACT <sup>(a)</sup>    |
| <u>Retro- B2</u>  | GGCTGGTGGAGATGGCTCAGT         | TACACTGTAGCTGTCTTCAGACA <sup>(a)</sup>  |
| <u>Retro- BM1</u> | CTAGAGCATTGGAAGGAGGTGC        | ACCACTATAGAATCACAGTACCAC <sup>(b)</sup> |
| <u>Retro- L1</u>  | GTGGGCGAAGAGGACGATGG          | CTTGGCAGTCTAGGGGGC <sup>(c)</sup>       |
| <u>Retro-MT</u>   | ATGTCTTGGGGAGGACTGTG          | AGCCCCAGCTAACAGAACT <sup>(d)</sup>      |
| <u>Retro-V30</u>  | CTTCATGAOCCAAOCCCTTCA         | GTATGAGTTTCTTCTGCOA <sup>(b)</sup>      |

(a) A Allen T, et al 2004

(b) Willard J. Costain et al 2006

(c) Fransen E et al, 1998

(d) Peaston A. et al, 2004

Supplementary Table S13  
**The primers used for QPCR analysis**

| chr regions   | forward 5'-->3'                             | reverse 5'-->3'                             |
|---------------|---------------------------------------------|---------------------------------------------|
| chr1-Adss     | GTTAGTGGTGCTCAACGTCTACGA                    | TGAGAACTAAGCTGGAGGCGG                       |
| chr2-Stk35    | TGAAGCAGACAACCACATCCA                       | TGTTAGTAGATGTAGGAAGACCCA                    |
| chr5-Rpl6     | GTCAGCCATATCATCACCGAG                       | ACTACATGCCTTCTCCTTCCA                       |
| chr5-Anapc4   | AAGTTCCCAAGACGTAATCCTTCC                    | GTGTTCTATGTTCTGATCCAGTC                     |
| chr6-Ldhd     | ATACTGCATTAATCCATCCCATCC                    | CTCAGAATCCGAATCCGAATCAC                     |
| chr7-Klf13    | GACTTCCATATGCTGACCCAC                       | CTTCCTTGCCTCATCTTCTGTC                      |
| chr7-Zfp619   | TCACCAGCATTACAGAAACCA                       | GGGACAAAGTTAGCAAAGAAAGG                     |
| chr7-Lmo1     | CCTGACTCTGCCATTTCTTCC                       | ATCCTGCTTTGCCCTCTGAC                        |
| chr11-Ilf1r2  | TTTGCTTTGGGACTTCGGTG                        | TGCTGAATATGAATGAGAGGCGG                     |
| chr12-Vrk1    | GAACCCACCTCTGTCTCCTTCC                      | GTCCACATAGAGCAACATCCGT                      |
| chr12-Cox16   | ACCAATACGCCACTCAGCCAA                       | GCCAATCGTTTCCGTTTGCCT                       |
| chr13-Gm13498 | TAGACTGCAAAGGACCCACTG                       | AAACGATCATCAGGAACGGG                        |
| chr13-Scamp1  | AGAGTTTCCATCCCAAGCCA                        | TCTTAACCATTCTGCCTTCTTCC                     |
| chr17-Fndc1   | ATCTTCTTCAATGTCCTCATCCTC                    | CTGCTGGAATGGAGTTGTATAGG                     |
| chrX-Par      | GCGCTCTTCATTTATTGATTCGT                     | ACACAGGGACGGACAGACAG                        |
|               |                                             |                                             |
| Tel_length    | CGGTTTGTTTGGGTTTGGGTTTGGGT<br>TTGGGTTTGGGTT | GGCTTGCCTTACCCTTACCCTTACC<br>CTTACCCTTACCCT |
| 36B4_F        | ACTGGTCTAGGACCCGAGAAG                       | TCAATGGTGCCTCTGGAGATT                       |

## Supplemental References

- Allen TA, Von Kaenel S, Goodrich JA, Kugel JF. 2004. The SINE-encoded mouse B2 RNA represses mRNA transcription in response to heat shock. *Nature structural & molecular biology* **11**(9): 816-821.
- Barr JA, Jones J, Glenister PH, Cattanach BM. 1995. Ubiquitous expression and imprinting of *Snrpn* in the mouse. *Mammalian genome : official journal of the International Mammalian Genome Society* **6**(6): 405-407.
- Bellve AR. 1993. Purification, culture, and fractionation of spermatogenic cells. *Methods in enzymology* **225**: 84-113.
- Choufani S, Shapiro JS, Susiarjo M, Butcher DT, Grafodatskaya D, Lou Y, Ferreira JC, Pinto D, Scherer SW, Shaffer LG et al. 2011. A novel approach identifies new differentially methylated regions (DMRs) associated with imprinted genes. *Genome research* **21**(3): 465-476.
- Constancia M, Hemberger M, Hughes J, Dean W, Ferguson-Smith A, Fundele R, Stewart F, Kelsey G, Fowden A, Sibley C et al. 2002. Placental-specific IGF-II is a major modulator of placental and fetal growth. *Nature* **417**(6892): 945-948.
- Costain WJ, Rasquinha I, Graber T, Luebbert C, Preston E, Slinn J, Xie X, MacManus JP. 2006. Cerebral ischemia induces neuronal expression of novel VL30 mouse retrotransposons bound to polyribosomes. *Brain research* **1094**(1): 24-37.
- Dockery L, Gerfen J, Harview C, Rahn-Lee C, Horton R, Park Y, Davis TL. 2009. Differential methylation persists at the mouse *Rasgrf1* DMR in tissues displaying monoallelic and biallelic expression. *Epigenetics* **4**(4): 241-247.
- Erkek S, Hisano M, Liang CY, Gill M, Murr R, Dieker J, Schubeler D, van der Vlag J, Stadler MB, Peters AH. 2013. Molecular determinants of nucleosome retention at CpG-rich sequences in mouse spermatozoa. *Nature structural & molecular biology* **20**(7): 868-875.
- Fransen E, D'Hooge R, Van Camp G, Verhoye M, Sijbers J, Reyniers E, Soriano P, Kamiguchi H, Willemsen R, Koekkoek SK et al. 1998. L1 knockout mice show dilated ventricles, vermis hypoplasia and impaired exploration patterns. *Human molecular genetics* **7**(6): 999-1009.
- Gan H, Wen L, Liao S, Lin X, Ma T, Liu J, Song CX, Wang M, He C, Han C et al. 2013. Dynamics of 5-hydroxymethylcytosine during mouse spermatogenesis. *Nature communications* **4**: 1995.
- Getun IV, Torres B, Bois PR. 2011. Flow cytometry purification of mouse meiotic cells. *Journal of visualized experiments : JoVE*(50).
- Joseph R, Dou D, Tsang W. 1994. Molecular cloning of a novel mRNA (neuronatin) that is highly expressed in neonatal mammalian brain. *Biochemical and biophysical research communications* **201**(3): 1227-1234.
- Mahadevaiah SK, Turner JM, Baudat F, Rogakou EP, de Boer P, Blanco-Rodriguez J, Jasin M, Keeney S, Bonner WM, Burgoyne PS. 2001. Recombinational DNA double-strand breaks in mice precede synapsis. *Nature genetics* **27**(3): 271-276.
- Page J, de la Fuente R, Manterola M, Parra MT, Viera A, Berrios S, Fernandez-Donoso R, Rufas JS. 2012. Inactivation or non-reactivation: what accounts better for the silence of sex chromosomes during mammalian male meiosis? *Chromosoma* **121**(3): 307-326.
- Peaston AE, Evsikov AV, Graber JH, de Vries WN, Holbrook AE, Solter D, Knowles BB. 2004. Retrotransposons regulate host genes in mouse oocytes and preimplantation embryos. *Developmental cell* **7**(4): 597-606.
- Peters AH, Plug AW, van Vugt MJ, de Boer P. 1997. A drying-down technique for the spreading of mammalian meiocytes from the male and female germline. *Chromosome research : an international journal on the molecular, supramolecular and evolutionary aspects of chromosome biology* **5**(1): 66-68.



- Plass C, Shibata H, Kalcheva I, Mullins L, Kotelevtseva N, Mullins J, Kato R, Sasaki H, Hirotsune S, Okazaki Y et al. 1996. Identification of Grf1 on mouse chromosome 9 as an imprinted gene by RLGS-M. *Nature genetics* **14**(1): 106-109.
- Russell LD. 1990. *Histological and histopathological evaluation of the testis*. Clearwater, FL, Cache River Press.
- Szabo PE, Mann JR. 1995. Allele-specific expression and total expression levels of imprinted genes during early mouse development: implications for imprinting mechanisms. *Genes & development* **9**(24): 3097-3108.
- Vallet-Erdtmann V, Tavernier G, Contreras JA, Mairal A, Rieu C, Touzalin AM, Holm C, Jegou B, Langin D. 2004. The testicular form of hormone-sensitive lipase HSLtes confers rescue of male infertility in HSL-deficient mice. *The Journal of biological chemistry* **279**(41): 42875-42880.
